# Supplementary material for: Mechanistic study on the regioselective Ni-catalyzed dicarboxylation of 1,3-dienes with CO2
Source: Royal Society of Chemistry journal article supplement (doi:10.1039/d0qo01173h), 2020-01-01
Supplement: d0qo01173h1.pdf [file d0qo01173h1.pdf]

## *Supporting Information*

# **Mechanistic Study on the Regioselective Ni-Catalyzed Dicarboxylation of 1,3-Dienes with CO<sub>2</sub>**

Wan Nie,<sup>a</sup> Yifan Shao,<sup>b</sup> Mårten S. G. Ahlquist,<sup>\*c</sup> Haizhu Yu<sup>\*b</sup> and Yao Fu<sup>\*a</sup>

<sup>a</sup>Hefei National Laboratory for Physical Sciences at the Microscale, iChEM, CAS Key Laboratory of Urban Pollutant Conversion, Anhui Province Key Laboratory of Biomass Clean Energy, Department of Chemistry, University of Science and Technology of China, Hefei, 230026, China.

<sup>b</sup>Department of Chemistry, Center for Atomic Engineering of Advanced Materials, Anhui Province Key Laboratory of Chemistry for Inorganic/Organic Hybrid Functionalized Materials, Anhui University, Hefei, 230601, China.

<sup>c</sup>Department of Theoretical Chemistry & Biology, School of Engineering Sciences in Chemistry Biotechnology and Health, KTH Royal Institute of Technology, Stockholm, 10691, Sweden.

[\\*cahlqui@kth.se](mailto:*cahlqui@kth.se)

[\\*byuhaizhu@ahu.edu.cn](mailto:*byuhaizhu@ahu.edu.cn)

[\\*afuyao@ustc.edu.cn](mailto:*afuyao@ustc.edu.cn)

## Table of Contents:

|                                                                                                                          |     |
|--------------------------------------------------------------------------------------------------------------------------|-----|
| Reduction of the Ni(II) species and ligand exchange on [Ni](DMA).....                                                    | S2  |
| Relative Gibbs free energies of <b>S-d1</b> and <b>T-d1</b> at different level of theory .....                           | S2  |
| MECPs in the transformation of <b>S-d1/d2</b> to <b>T-d1/d2</b> .....                                                    | S3  |
| The typical CO <sub>2</sub> coordination-alkene insertion pathway .....                                                  | S4  |
| Analysis on the preference of <b>T-TS3</b> over <b>T-TS2</b> .....                                                       | S5  |
| Relative Gibbs free energies of <b>S-TS3</b> and <b>T-TS3</b> with the full ligand at different level of theory<br>..... | S6  |
| Direct carboxylation of Ni(II) species .....                                                                             | S6  |
| One-electron reduction of Ni(I) species and carboxylation of Ni(0) species .....                                         | S7  |
| 1,2 and 3,4-dicarboxylation of Ni(I) species.....                                                                        | S8  |
| Effect of the Mn(II) cation on the carboxylate group .....                                                               | S9  |
| Frontier molecular orbital of Ni(I) species .....                                                                        | S10 |
| Destruction of the $\pi$ - $\pi$ conjugation in <b>T-TS4</b> .....                                                       | S11 |
| Relative Gibbs free energies of the key intermediates and transition states with the full ligand<br>.....                | S12 |
| Cartesian coordinates of all intermediates and transition states .....                                                   | S13 |

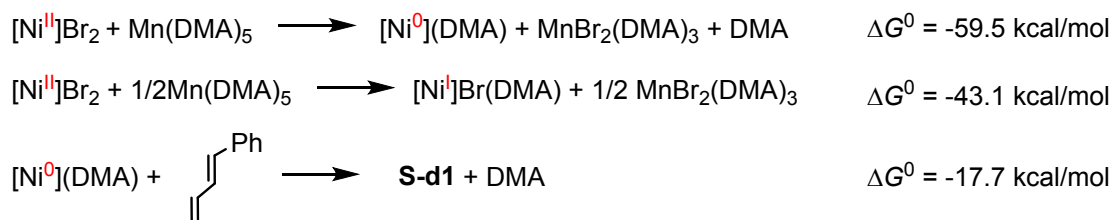

**Fig. S1** Reduction of Ni(II) species to Ni(0) and Ni(I) species and the corresponding free energy changes. (L1)Ni is abbreviated to [Ni]. **S-d1** is the singlet C1,C2-coordinated [Ni]-diene intermediate.

The computation of [Ni]Br<sub>2</sub> (triplet) was based on the single crystal structure of the paramagnetic [Ni]Br<sub>2</sub> species reported by Martin et al. (*Angew. Chem. Int. Ed.* **2016**, 55, 11207). And the structure of [MnBr<sub>2</sub>(DMA)<sub>3</sub>] (sextet) was based on the single crystal structure of the high-spin MnBr<sub>2</sub>(DMU)<sub>3</sub> species (DMU = N,N'-Dimethylurea) reported by Hugel et al. (*Inorg. Chem.* **1986**, 25, 22, 3957). The possibility of [Ni](DMA)<sub>2</sub> with the 18-electron structure was also examined, but was excluded due to the automatic dissociation of one DMA during geometry optimization.

**Table S1** Gibbs free energies gap between **S-d1** and **T-d1** calculated at the M(sp)-IEFPCM/SDD+f-6-311G(d,p)//B3LYP-D3-IEFPCM/SDD+f-6-311G(d,p) level of theory.

| M(sp)                                                         | B3LYP-D3 | M06 | M06L | B3PW91 | mPW-B95 | PBE1PBE |
|---------------------------------------------------------------|----------|-----|------|--------|---------|---------|
| $\Delta G(\text{T-d1}) - \Delta G(\text{S-d1})$<br>(kcal/mol) | 4.2      | 9.5 | 11.2 | 3.3    | 18.4    | 1.0     |

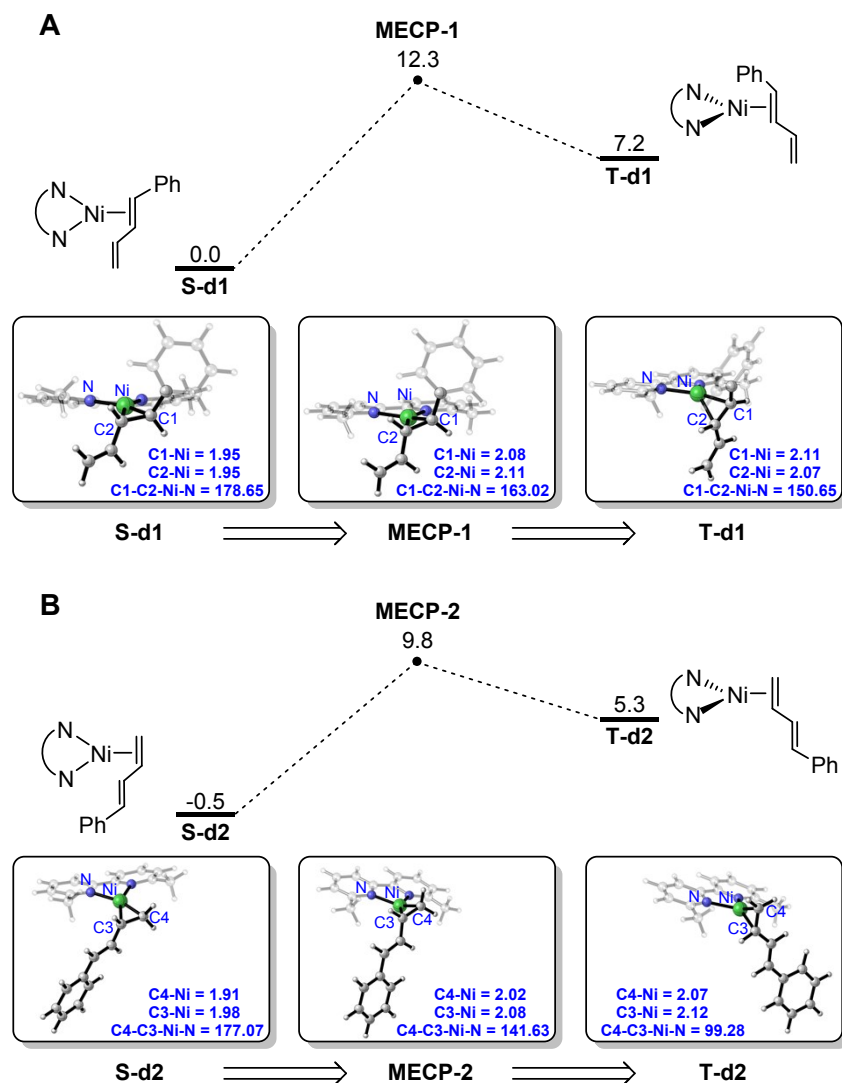

**Fig. S2** Electronic energy profiles of the spin inversion progress of (A) S-d1 and (B) S-d2 (in kcal/mol). Bond lengths and angles are given in angstroms and degrees, respectively.

This progress is discussed with electronic energies because minimum energy crossing points (MECPs) are not stationary points and cannot be analyzed with frequency calculations.

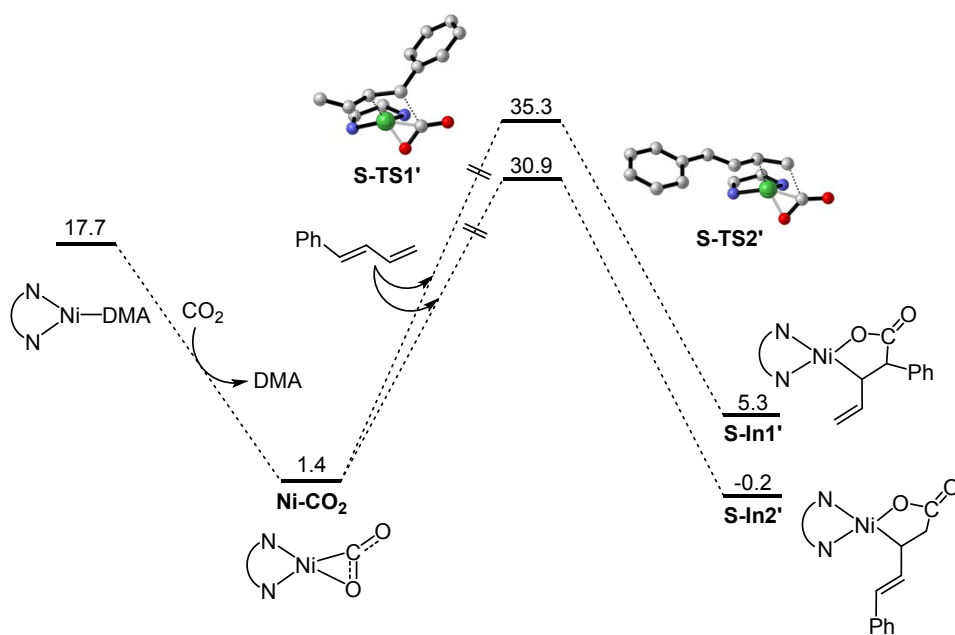

**Fig. S3** Gibbs free energy profile of the typical CO<sub>2</sub> coordination-alkene insertion pathway starting from [Ni](DMA) (in kcal/mol).

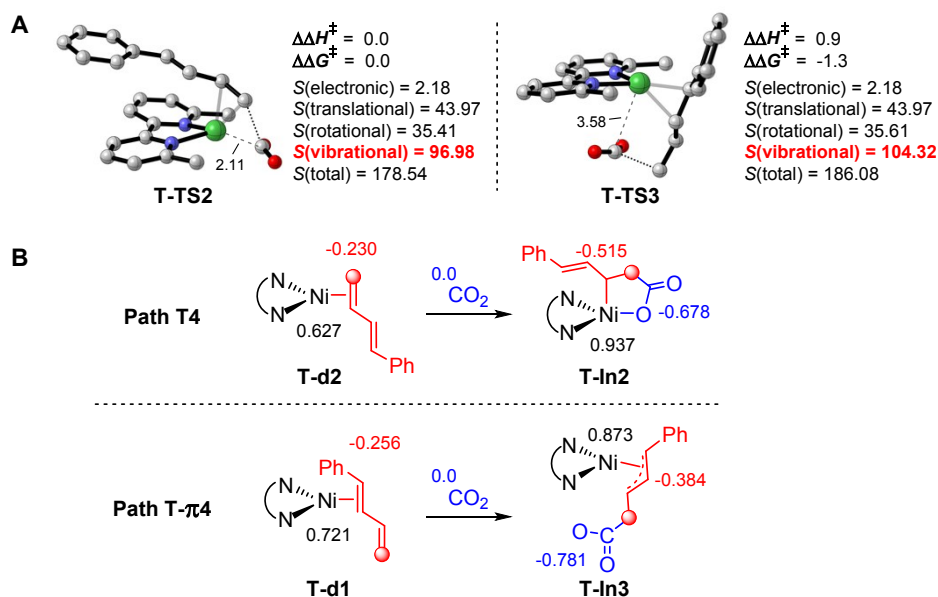

**Fig. S4** (A) Optimized structures, relative Gibbs free energies/enthalpies, and entropies of **T-TS2** and **T-TS3**. Distances are given in angstroms. Energies and entropies are given in kcal/mol and  $\text{cal}\cdot\text{mol}^{-1}\cdot\text{K}^{-1}$ . (B) NBO charge distribution in the intermediates of Path T4/Path T- $\pi$ 4.

The relative enthalpy of **T-TS3** is slightly higher than **T-TS2**, but Gibbs free energy of **T-TS3** is relatively lower (Fig. S4A). In other words, the entropic effect is mainly responsible for the relatively lower free energy of **T-TS3** than **T-TS2**. From the calculation results in Fig. S4, the electronic, translational, and rotational entropy of **T-TS2** are very close to the related ones of **T-TS3**, and the two species are mainly differentiated on the vibrational entropy. After a careful analysis on the vibrational modes and the optimized geometries of **T-TS2** and **T-TS3**, we noticed that the higher confusion degree (and thus higher vibrational entropy) of  $\text{CO}_2$  moiety in **T-TS3** than that in **T-TS2** accounts for the larger entropic effect in the former case (the C-Ni bond distance in **T-TS2** and **T-TS3** is 2.11 and 3.58 Å).

In the precursor of **T-TS2** (i.e. **T-d2** in Fig. S4B), the two coordinated C atoms (i.e. C3 and C4) feature some  $\text{sp}^3$  characteristics due to a degree of Ni-C covalent bonding character. By contrast, in the precursor of **T-TS3** (i.e. **T-d1** in Fig. S4B), the terminal, uncoordinated atom is a typical  $\text{C}(\text{sp}^2)$ . To this end, the electron transfer from the free alkene group in **T-d1** is more efficient than that of the coordinated alkene in **T-d2**, resulting in the necessity of the Ni-C bond assisted carboxylation in **T-TS2**. The C-C bond formation in **T-TS3** satisfies the electronic demand of  $\text{CO}_2$  insertion and the vibrational motion of the  $\text{CO}_2$  moiety is easier than that in **T-TS2**. In this context, the carboxylation occurring on the uncoordinated alkene group is more favored.

**Table S2** Gibbs free energies gap between **S-TS3** and **T-TS3** with the full ligand calculated at the M(sp)-IEFPCM/SDD+f-6-311G(d,p)//B3LYP-D3-IEFPCM/SDD+f-6-311G(d,p) level of theory.

| M(sp)                                           | B3LYP-D3 | B3LYP* |
|-------------------------------------------------|----------|--------|
| $\Delta G(\text{S-TS3})-\Delta G(\text{T-TS3})$ | 5.1      | 8.1    |
| (kcal/mol)                                      |          |        |

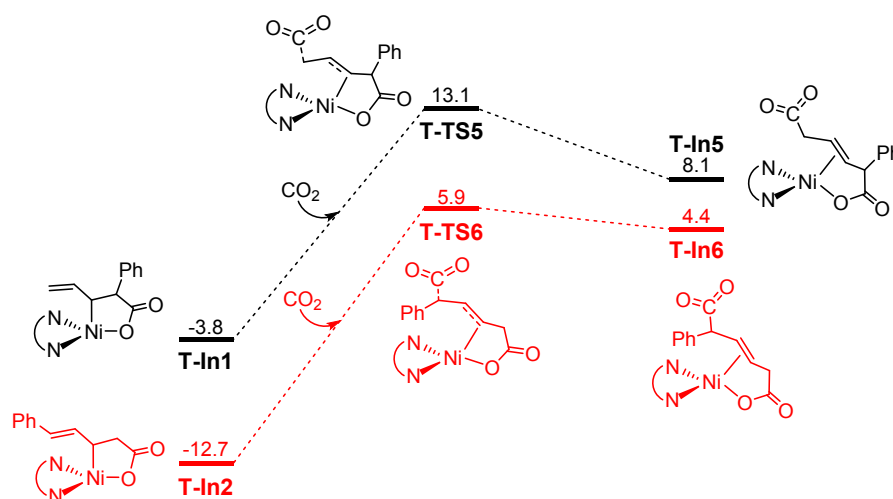

**Fig. S5** Gibbs free energy profile of the direct carboxylation of Ni(II) species (in kcal/mol).

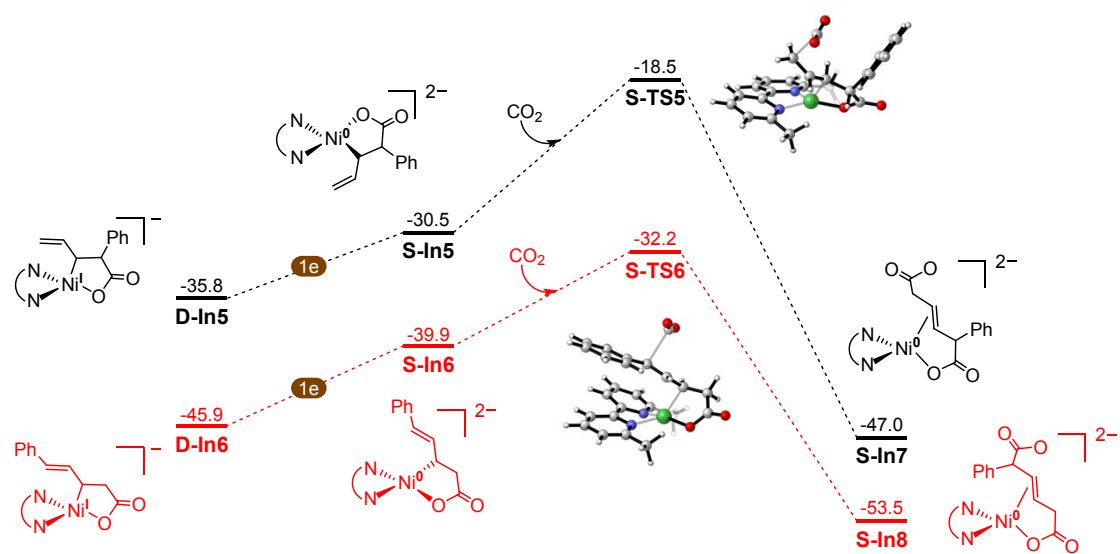

**Fig. S6** Gibbs free energy profiles of one-electron reduction of Ni(I) species and carboxylation of Ni(0) species (in kcal/mol).



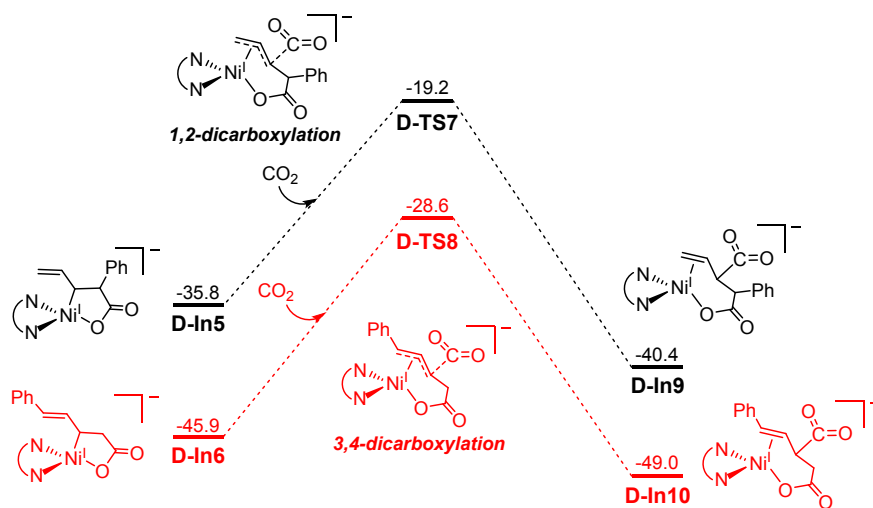

**Fig. S7** Gibbs free energy profiles of 1,2 and 3,4-dicarboxylation (in kcal/mol).

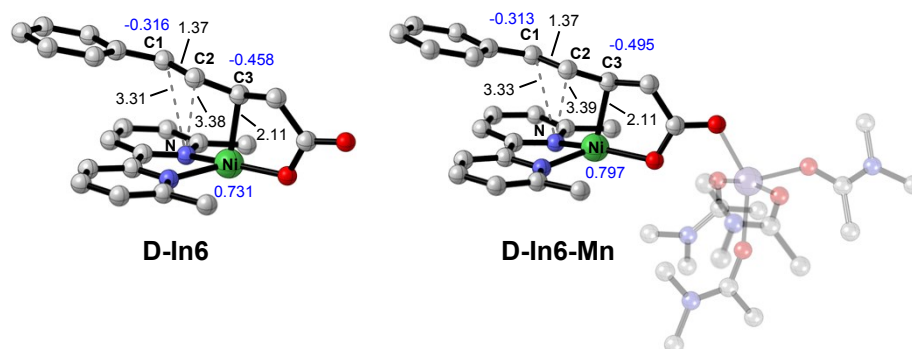

**Fig. S8** Optimized structures and NBO charge distribution (blue color) of **D-In6** and **D-In6-Mn**. Bond distances are given in angstroms (black color).

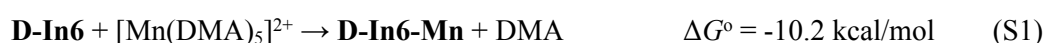

After reduction of the alkyl-Ni(II) intermediate, no bromide is available and thus  $[\text{Mn}(\text{DMA})_5]^{2+}$  was used as the Mn(II) product to keep consistency on the number of ligands with  $\text{MnBr}_2(\text{DMA})_3$ . The reaction of **D-In6** with  $[\text{Mn}(\text{DMA})_5]^{2+}$  is exergonic by 10.2 kcal/mol (eq. S1). Albeit the thermodynamic feasibility, the binding of  $[\text{Mn}(\text{DMA})_5]^{2+}$  makes little influence on the electronic and steric effect on the reaction center of **D-In6**. For example, the C1-C2 and C3-Ni bond lengths, and NBO charges on C1, C3, Ni of **D-In6-Mn** are all quite close to the related ones of **D-In6** (Fig. S8). Meanwhile, the C1/C2-N bond lengths in **D-In6** are also close to the related ones in **D-In6-Mn**, verifying the similar chemical environment of the C1=C2 double bond. In view of the great similarity of the Mn-absent and Mn-present systems, and the especially time-consuming calculations on the Mn-present molecules, the subsequent transformations from **D-In6** was conducted.

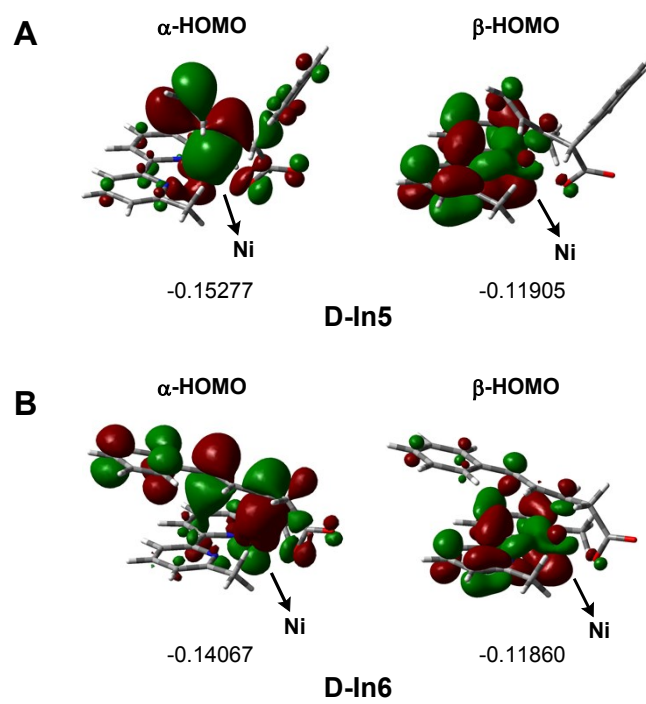

**Fig. S9** The frontier molecular orbital of (A) **D-In5** and (B) **D-In6**.

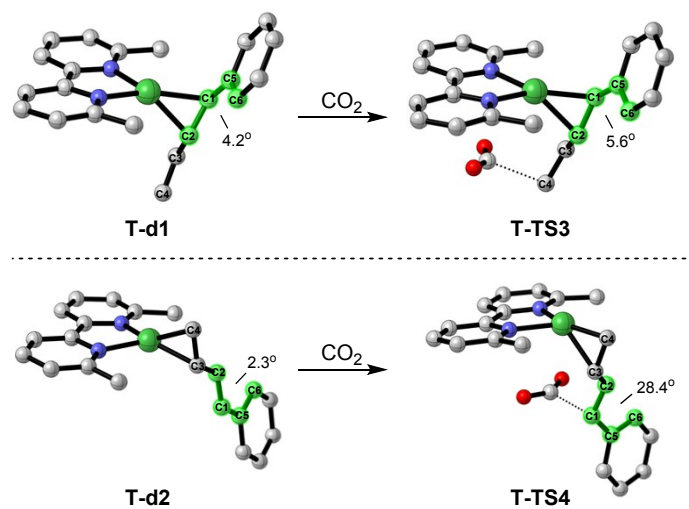

**Fig. S10** Optimized structures of **T-d1**, **T-d2**, **T-TS3** and **T-TS4**.

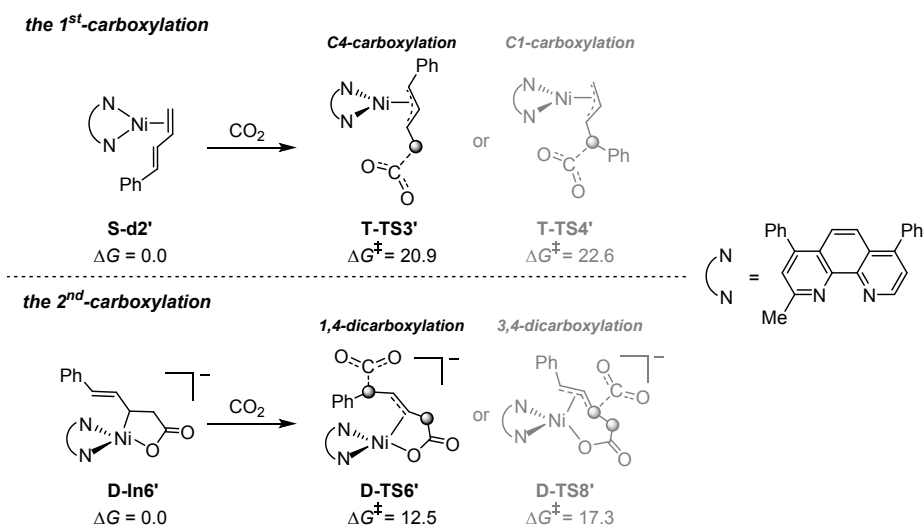

**Fig. S11** Relative Gibbs free energies of the key intermediates and transition states with the full ligand (in kcal/mol).

Similar to the modeling reaction system, the calculation results indicate that the first carboxylation occurs favorably on the C4-position (over the C1-position); and the second carboxylation selectivity on the C1-position (instead of the C3-position). In this context, the 1,4-dicarboxylation is the predicted product of the reaction system with 2-methyl-4,7-diphenyl-1,10-phenanthroline, and the first carboxylation step is the rate-determining step.

### Cartesian coordinates of all intermediates and transition states

#### [Ni]Br<sub>2</sub> (triplet)

Thermal Correction to Free Energy: 0.168464 Hartree

SCF energy: -5893.647546 Hartree

Gibbs free energy: -5893.479082 Hartree

Coordinates:

|    |             |             |             |
|----|-------------|-------------|-------------|
| C  | -2.66210200 | 0.57469600  | -0.11861400 |
| C  | -0.74191700 | 1.92073700  | -0.03246500 |
| C  | -1.50996100 | 3.08187500  | -0.05762600 |
| C  | -2.89424100 | 2.96762100  | -0.11336900 |
| C  | -3.47659700 | 1.70777300  | -0.14362700 |
| H  | -1.04674400 | 4.05713700  | -0.03397300 |
| H  | -3.51149400 | 3.85725600  | -0.13243700 |
| H  | -4.55133700 | 1.59125200  | -0.18612500 |
| C  | 0.73968600  | 1.92149000  | 0.03160300  |
| C  | 1.50650600  | 3.08345000  | 0.05607300  |
| C  | 2.89090000  | 2.97068500  | 0.11194000  |
| H  | 1.04227600  | 4.05822100  | 0.03181500  |
| C  | 2.66125100  | 0.57749400  | 0.11867400  |
| C  | 3.47454700  | 1.71146400  | 0.14299000  |
| H  | 3.50722600  | 3.86097600  | 0.13047800  |
| H  | 4.54940900  | 1.59610000  | 0.18559400  |
| N  | -1.32468500 | 0.70196100  | -0.06420700 |
| N  | 1.32368900  | 0.70330300  | 0.06414300  |
| C  | -3.21574500 | -0.81722400 | -0.15006100 |
| H  | -2.82761300 | -1.34992800 | -1.02304500 |
| H  | -2.88684000 | -1.36710700 | 0.73636500  |
| H  | -4.30400500 | -0.81346700 | -0.18732800 |
| C  | 3.21657200  | -0.81377100 | 0.15092200  |
| H  | 2.82880200  | -1.34657600 | 1.02399800  |
| H  | 2.88863600  | -1.36443200 | -0.73538700 |
| H  | 4.30481100  | -0.80862000 | 0.18853000  |
| Ni | 0.00012400  | -0.83118600 | 0.00036200  |
| Br | -0.15563700 | -1.59611000 | 2.28907200  |
| Br | 0.15677000  | -1.59648300 | -2.28822900 |

#### Mn(DMA)<sub>5</sub> (quartet)

Thermal Correction to Free Energy: 0.570196 Hartree

SCF energy: -1544.045526 Hartree

Gibbs free energy: -1543.475330 Hartree

Coordinates:

|    |            |            |             |
|----|------------|------------|-------------|
| Mn | 0.07403700 | 0.31165400 | 0.38508000  |
| N  | 3.75018200 | 1.05641700 | -1.72980400 |

|   |             |             |             |
|---|-------------|-------------|-------------|
| C | 5.01160700  | 0.46338100  | -2.15392100 |
| H | 5.75745800  | 0.55789600  | -1.35781500 |
| H | 4.89783700  | -0.58763000 | -2.39804400 |
| H | 5.38685300  | 0.98655200  | -3.03817100 |
| C | 3.82025900  | 2.48121300  | -1.42019300 |
| H | 2.84316200  | 2.82971500  | -1.10123300 |
| H | 4.54525800  | 2.65201400  | -0.61867200 |
| H | 4.13937900  | 3.03864500  | -2.30558900 |
| C | 2.60730400  | 0.36482000  | -1.52492300 |
| C | 2.57540800  | -1.11480100 | -1.83774500 |
| H | 2.81881200  | -1.29788000 | -2.88809700 |
| H | 3.27095800  | -1.66853300 | -1.20635300 |
| H | 1.56589000  | -1.46187200 | -1.63795100 |
| O | 1.56786200  | 0.95696500  | -1.15647200 |
| N | -1.94784200 | 3.24148200  | -0.61591400 |
| C | -3.29657700 | 3.78572800  | -0.74084800 |
| H | -3.92383800 | 3.07108100  | -1.28027200 |
| H | -3.74696700 | 3.96627200  | 0.22950400  |
| H | -3.27465500 | 4.72400900  | -1.30270700 |
| C | -1.33058700 | 2.83937600  | -1.88001000 |
| H | -0.31115800 | 2.50728900  | -1.70397800 |
| H | -1.90188700 | 2.02177400  | -2.32954600 |
| H | -1.33164200 | 3.68743400  | -2.56990700 |
| C | -1.28820800 | 3.08201000  | 0.54821800  |
| C | -1.93989000 | 3.53908100  | 1.83189800  |
| H | -2.30238700 | 4.56687900  | 1.77667600  |
| H | -2.77846700 | 2.88091000  | 2.07145700  |
| H | -1.20183600 | 3.45563800  | 2.62599700  |
| O | -0.15535500 | 2.55555800  | 0.58218400  |
| N | 3.62684600  | -1.67412500 | 1.56444200  |
| C | 5.05778000  | -1.53677000 | 1.35532000  |
| H | 5.52082200  | -2.52754800 | 1.31112900  |
| H | 5.24390300  | -1.03123000 | 0.40573200  |
| H | 5.57014800  | -0.96689400 | 2.15149400  |
| C | 3.31902100  | -2.38072900 | 2.81236200  |
| H | 2.23699800  | -2.44961500 | 2.92171900  |
| H | 3.73502500  | -3.39287700 | 2.78504200  |
| H | 3.72959700  | -1.86921800 | 3.70216700  |
| C | 2.84618700  | -0.49003700 | 1.32904700  |
| C | 3.34018000  | 0.85123000  | 1.82479600  |
| H | 4.40236600  | 1.01759900  | 1.63019500  |
| H | 2.77692200  | 1.64387100  | 1.32743800  |
| H | 3.17802200  | 0.97054900  | 2.91360000  |
| O | 1.53664600  | -0.68585100 | 1.35513500  |

|   |             |             |             |
|---|-------------|-------------|-------------|
| N | -3.33485300 | -0.95539000 | 0.59914000  |
| C | -4.40052600 | -1.92021400 | 0.78264800  |
| H | -4.66791900 | -2.35909200 | -0.18399100 |
| H | -4.05751300 | -2.72422900 | 1.43919300  |
| H | -5.32177600 | -1.49458400 | 1.21987700  |
| C | -3.70356700 | 0.12590500  | -0.31137200 |
| H | -2.83666100 | 0.76399000  | -0.46854200 |
| H | -4.00801700 | -0.28548000 | -1.27750700 |
| H | -4.53309300 | 0.74747600  | 0.07169600  |
| C | -2.63389900 | -0.54644400 | 1.78822400  |
| C | -3.45007300 | -0.15268800 | 3.00319600  |
| H | -4.21741200 | -0.88818700 | 3.25830100  |
| H | -2.79122600 | -0.03132000 | 3.86630900  |
| H | -3.96424400 | 0.81613900  | 2.84978100  |
| O | -1.54233100 | 0.16862700  | 1.58408900  |
| N | -2.08673200 | -2.68720300 | -1.88972000 |
| C | -2.69710900 | -4.00511400 | -1.72978000 |
| C | -2.43450600 | -1.96469900 | -3.10990400 |
| C | -1.21342900 | -2.16596700 | -1.00819400 |
| H | -2.09112000 | -4.78774400 | -2.19784000 |
| H | -2.84597900 | -4.24355800 | -0.67956700 |
| H | -3.67599600 | -3.99403600 | -2.21029800 |
| H | -1.93935300 | -0.99863500 | -3.10834100 |
| H | -2.11739200 | -2.53653400 | -3.98745600 |
| H | -3.51642200 | -1.81807700 | -3.16138800 |
| C | -0.79494700 | -2.98414500 | 0.18751200  |
| O | -0.71435400 | -1.03181000 | -1.19467600 |
| H | -0.67554800 | -4.04316500 | -0.04116900 |
| H | 0.14707500  | -2.57920000 | 0.55746000  |
| H | -1.54443500 | -2.86295600 | 0.97560600  |

### [Ni](DMA)

Thermal Correction to Free Energy: 0.296325 Hartree

SCF energy: -1033.111195 Hartree

Gibbs free energy: -1032.814870 Hartree

Coordinates:

|   |             |             |             |
|---|-------------|-------------|-------------|
| C | 0.67994700  | -2.53180900 | -0.42765800 |
| C | -1.37359800 | -1.56542900 | 0.13338900  |
| C | -1.93463400 | -2.81406800 | 0.39182500  |
| C | -1.15022600 | -3.94989200 | 0.24681000  |
| C | 0.16342900  | -3.80376600 | -0.18072900 |
| H | -2.97339200 | -2.90011900 | 0.67718300  |
| H | -1.56325500 | -4.93215600 | 0.44066600  |
| H | 0.79583200  | -4.66917500 | -0.33141400 |



|    |             |             |             |
|----|-------------|-------------|-------------|
| C  | -2.15516600 | -0.31281000 | 0.18351800  |
| C  | -3.41816600 | -0.21547800 | 0.76603200  |
| C  | -4.07856200 | 1.00612400  | 0.72481200  |
| H  | -3.87235400 | -1.06655400 | 1.25366100  |
| C  | -2.19271900 | 1.93480900  | -0.45344700 |
| C  | -3.46558100 | 2.08631800  | 0.10011300  |
| H  | -5.05921300 | 1.11284600  | 1.17251700  |
| H  | -3.96314700 | 3.04585700  | 0.03887200  |
| N  | -0.07198800 | -1.42095900 | -0.24138900 |
| N  | -1.54755800 | 0.75090200  | -0.39395100 |
| C  | 2.08484700  | -2.35221100 | -0.91459200 |
| H  | 2.10473800  | -1.66360000 | -1.75974600 |
| H  | 2.69999800  | -1.91017200 | -0.13053300 |
| H  | 2.52125900  | -3.30650100 | -1.21131200 |
| C  | -1.48865700 | 3.06740000  | -1.13908500 |
| H  | -0.52403900 | 3.24978100  | -0.66188300 |
| H  | -1.27463500 | 2.79869100  | -2.17750400 |
| H  | -2.09271300 | 3.97484300  | -1.12554000 |
| Ni | 0.46776200  | 0.42507600  | -0.48363800 |
| N  | 2.77692500  | 1.26420500  | 1.14054000  |
| C  | 1.82548100  | 1.88175400  | 2.05907300  |
| H  | 2.32307100  | 2.07655700  | 3.01235000  |
| H  | 1.46322400  | 2.82009500  | 1.64471000  |
| H  | 0.94790700  | 1.23589200  | 2.24733300  |
| C  | 3.32984300  | 0.04684700  | 1.72311800  |
| H  | 4.09650900  | -0.38403300 | 1.07936900  |
| H  | 3.79943300  | 0.28139300  | 2.68187900  |
| H  | 2.55456200  | -0.71961800 | 1.90206000  |
| C  | 2.27183400  | 1.11100500  | -0.21991100 |
| C  | 3.37737300  | 0.82113200  | -1.22959100 |
| H  | 3.94770900  | -0.08091900 | -1.00876300 |
| H  | 2.93022300  | 0.70483900  | -2.21738900 |
| H  | 4.07966300  | 1.66458600  | -1.25851000 |
| O  | 1.37587200  | 2.01834700  | -0.60557500 |

**[Ni]Br(DMA)**

Thermal Correction to Free Energy: 0.285849 Hartree

SCF energy: -3607.370680 Hartree

Gibbs free energy: -3607.084831 Hartree

Coordinates:

|   |             |             |            |
|---|-------------|-------------|------------|
| C | 1.11173600  | -1.34189900 | 1.79459100 |
| C | -0.96307400 | -1.85904600 | 0.83490400 |
| C | -0.92351400 | -3.15067600 | 1.36396700 |
| C | 0.17203200  | -3.53326400 | 2.12439500 |

|    |             |             |             |
|----|-------------|-------------|-------------|
| C  | 1.19967300  | -2.61942400 | 2.34334400  |
| H  | -1.73108300 | -3.84654600 | 1.18691600  |
| H  | 0.22415400  | -4.53053200 | 2.54406800  |
| H  | 2.06509300  | -2.88849000 | 2.93534200  |
| C  | -2.06938800 | -1.34981700 | 0.00335600  |
| C  | -3.18909900 | -2.10761800 | -0.34512500 |
| C  | -4.16570800 | -1.53897300 | -1.14996700 |
| H  | -3.29791500 | -3.12536700 | 0.00226200  |
| C  | -2.86387700 | 0.48489300  | -1.22205600 |
| C  | -3.99799900 | -0.22794500 | -1.59504900 |
| H  | -5.04335500 | -2.10800800 | -1.43106000 |
| H  | -4.73938700 | 0.24164700  | -2.22901800 |
| N  | 0.04458400  | -0.97572900 | 1.05213900  |
| N  | -1.91958400 | -0.06778000 | -0.42417600 |
| C  | 2.19858500  | -0.32285700 | 1.98297600  |
| H  | 2.79621800  | -0.23985200 | 1.07203900  |
| H  | 1.76828000  | 0.66265000  | 2.17505800  |
| H  | 2.86037600  | -0.59965300 | 2.80401500  |
| C  | -2.60686400 | 1.88961700  | -1.68087800 |
| H  | -2.41579000 | 2.53690000  | -0.82034900 |
| H  | -1.70565600 | 1.91931900  | -2.30131100 |
| H  | -3.44370400 | 2.28486200  | -2.25656800 |
| Ni | -0.24094700 | 0.81804400  | 0.17308300  |
| N  | 3.31211200  | -0.40624900 | -1.65006600 |
| C  | 3.94303500  | -1.59265400 | -2.22387600 |
| H  | 4.78998500  | -1.87900000 | -1.59733900 |
| H  | 3.25369800  | -2.43067600 | -2.26105600 |
| H  | 4.31221000  | -1.38711900 | -3.23387400 |
| C  | 4.23616200  | 0.64854400  | -1.23478900 |
| H  | 4.80042000  | 1.01328500  | -2.09840900 |
| H  | 3.67520300  | 1.46840300  | -0.79709200 |
| H  | 4.94039100  | 0.25187100  | -0.49934600 |
| C  | 1.97867100  | -0.19707400 | -1.61960500 |
| C  | 1.06108200  | -1.28239600 | -2.14057800 |
| H  | 1.31741800  | -1.57375000 | -3.16071000 |
| H  | 1.10969700  | -2.17169200 | -1.50764600 |
| H  | 0.04475700  | -0.89705600 | -2.11458400 |
| O  | 1.50529100  | 0.86242700  | -1.15976700 |
| Br | -0.04758000 | 3.03559900  | 1.19318700  |

**MnBr<sub>2</sub>(DMA)<sub>3</sub> (sextet)**

Thermal Correction to Free Energy: 0.325294 Hartree

SCF energy: -6116.726477 Hartree

Gibbs free energy: -6116.401184 Hartree

Coordinates:

|    |             |             |             |
|----|-------------|-------------|-------------|
| Mn | -0.27191100 | -0.64911500 | -0.08634300 |
| N  | -3.96411000 | 1.63105900  | 0.36513700  |
| C  | -3.38201900 | 2.96101800  | 0.17761800  |
| H  | -3.97842900 | 3.68692300  | 0.73247800  |
| H  | -2.36112700 | 2.96901900  | 0.54748900  |
| H  | -3.38297800 | 3.23725800  | -0.88084000 |
| C  | -5.42611800 | 1.57963600  | 0.36814600  |
| H  | -5.78869500 | 0.57232700  | 0.18723000  |
| H  | -5.82395800 | 1.94252800  | 1.32032300  |
| H  | -5.79917500 | 2.22046600  | -0.43302600 |
| C  | -3.16797200 | 0.55958000  | 0.49183200  |
| C  | -3.78027400 | -0.79022300 | 0.77559400  |
| H  | -4.17378700 | -1.21909300 | -0.14918800 |
| H  | -2.99659900 | -1.44490500 | 1.15131000  |
| H  | -4.58550500 | -0.73398300 | 1.50828600  |
| O  | -1.92457800 | 0.68669200  | 0.38424100  |
| N  | 2.29462300  | 2.87146300  | 0.45508700  |
| C  | 3.21460100  | 2.24137900  | 1.40440300  |
| H  | 3.10302700  | 2.69377900  | 2.39382700  |
| H  | 3.00236700  | 1.17875800  | 1.46614400  |
| H  | 4.24016100  | 2.39230600  | 1.06206200  |
| C  | 2.60101700  | 4.26207700  | 0.12526400  |
| H  | 1.95879900  | 4.63478400  | -0.66574800 |
| H  | 2.47789900  | 4.89356300  | 1.00992000  |
| H  | 3.63772000  | 4.33060800  | -0.21091200 |
| C  | 1.20207500  | 2.21516900  | 0.03433800  |
| C  | 0.24891100  | 2.88314700  | -0.92728100 |
| H  | 0.74381300  | 3.10087600  | -1.87638700 |
| H  | -0.58491000 | 2.20706500  | -1.09571400 |
| H  | -0.13527700 | 3.82105100  | -0.52214200 |
| O  | 0.98779200  | 1.04282300  | 0.41984400  |
| N  | 3.78633600  | -1.03165600 | -0.24560000 |
| C  | 5.10899100  | -0.48125800 | -0.53324100 |
| H  | 5.82658300  | -1.29871800 | -0.64008900 |
| H  | 5.10900100  | 0.09846300  | -1.45047600 |
| H  | 5.43149600  | 0.16052400  | 0.29057600  |
| C  | 3.71573500  | -1.92942000 | 0.90993300  |
| H  | 2.68301900  | -2.02592700 | 1.23581300  |
| H  | 4.11164800  | -2.91631000 | 0.65245200  |
| H  | 4.31867400  | -1.50848500 | 1.71631200  |
| C  | 2.69698500  | -0.83274200 | -0.99922400 |
| C  | 2.74804500  | 0.14790000  | -2.14803000 |
| H  | 3.36426900  | -0.24091700 | -2.96240400 |

|    |             |             |             |
|----|-------------|-------------|-------------|
| H  | 1.73284200  | 0.28311400  | -2.51439700 |
| H  | 3.15553100  | 1.11345100  | -1.84489400 |
| O  | 1.63433400  | -1.45258400 | -0.75717600 |
| Br | -0.25617100 | -1.93036200 | 2.20066800  |
| Br | -1.56002500 | -1.53620200 | -2.21047400 |

### DMA

Thermal Correction to Free Energy: 0.096379 Hartree

SCF energy: -287.929558 Hartree

Gibbs free energy: -287.833179 Hartree

Coordinates:

|   |             |             |             |
|---|-------------|-------------|-------------|
| N | -0.58805500 | 0.07820500  | -0.03779500 |
| C | -1.63225000 | -0.93942100 | 0.00546300  |
| H | -2.31146000 | -0.81746600 | -0.84368400 |
| H | -1.17217500 | -1.92238800 | -0.03609300 |
| H | -2.21407600 | -0.85019500 | 0.92928800  |
| C | -1.06986700 | 1.45322200  | 0.01063100  |
| H | -0.27186300 | 2.16557800  | -0.17444900 |
| H | -1.83713900 | 1.59818400  | -0.75528800 |
| H | -1.51612600 | 1.67412200  | 0.98701800  |
| C | 0.72404300  | -0.29365300 | -0.00633900 |
| C | 1.77064600  | 0.81033500  | 0.00232500  |
| H | 1.66362100  | 1.46129500  | 0.87331400  |
| H | 2.74831200  | 0.33413300  | 0.03235500  |
| H | 1.70667600  | 1.43363500  | -0.89291900 |
| O | 1.07064700  | -1.47590300 | 0.00906700  |

### 1-Phenyl-1,3-butadiene

Thermal Correction to Free Energy: 0.131537 Hartree

SCF energy: -387.169928 Hartree

Gibbs free energy: -387.038392 Hartree

Coordinates:

|   |             |             |             |
|---|-------------|-------------|-------------|
| C | 1.97702600  | 0.13842400  | -0.00004400 |
| H | 1.85608800  | 1.21923400  | -0.00008600 |
| C | 0.89673800  | -0.66754600 | -0.00001200 |
| H | 1.06883200  | -1.74249400 | 0.00007000  |
| C | 3.34195000  | -0.35231000 | 0.00000000  |
| H | 3.46905100  | -1.43355400 | 0.00000900  |
| C | 4.42716600  | 0.43488500  | 0.00002800  |
| H | 4.34063300  | 1.51730100  | 0.00001900  |
| H | 5.42835800  | 0.02080800  | 0.00005800  |
| C | -0.51277700 | -0.26845800 | -0.00002400 |
| C | -1.50032000 | -1.26997100 | -0.00000500 |
| C | -0.93762900 | 1.07404900  | 0.00000700  |

|   |             |             |            |
|---|-------------|-------------|------------|
| C | -2.85504200 | -0.94882500 | 0.00001500 |
| H | -1.19608100 | -2.31162900 | 0.00000700 |
| C | -2.28982700 | 1.39407700  | 0.00000800 |
| H | -0.20821700 | 1.87529300  | 0.00002300 |
| C | -3.25703900 | 0.38573600  | 0.00000300 |
| H | -3.59578500 | -1.74056600 | 0.00002300 |
| H | -2.59365800 | 2.43501000  | 0.00001000 |
| H | -4.31069900 | 0.64023500  | 0.00000600 |

## CO<sub>2</sub>

Thermal Correction to Free Energy: -0.009077 Hartree

SCF energy: -188.643855 Hartree

Gibbs free energy: -188.652931 Hartree

Coordinates:

|   |            |            |             |
|---|------------|------------|-------------|
| C | 0.00000000 | 0.00000000 | 0.00000000  |
| O | 0.00000000 | 0.00000000 | 1.16036900  |
| O | 0.00000000 | 0.00000000 | -1.16036900 |

## S-d1

Thermal Correction to Free Energy: 0.329444 Hartree

SCF energy: -1132.377800 Hartree

Gibbs free energy: -1132.048356 Hartree

Coordinates:

|   |             |             |             |
|---|-------------|-------------|-------------|
| C | -2.34708300 | -1.91265800 | 0.84047100  |
| C | -2.70156000 | 0.34294200  | 0.34803100  |
| C | -4.06377700 | 0.22959400  | 0.62169400  |
| C | -4.57150000 | -1.00334100 | 1.00918200  |
| C | -3.70246900 | -2.07834700 | 1.13411900  |
| H | -4.71855400 | 1.08560900  | 0.54931100  |
| H | -5.62643100 | -1.11706600 | 1.22709300  |
| H | -4.06123700 | -3.04663900 | 1.45864100  |
| C | -2.05397600 | 1.63096700  | 0.00786800  |
| C | -2.77178400 | 2.81464800  | -0.15470400 |
| C | -2.08078600 | 3.99332900  | -0.40233900 |
| H | -3.84996500 | 2.82357900  | -0.08871500 |
| C | -0.02498500 | 2.74024400  | -0.31322000 |
| C | -0.69508000 | 3.95636200  | -0.46545600 |
| H | -2.61634200 | 4.92582000  | -0.53250000 |
| H | -0.12306900 | 4.85965500  | -0.63446100 |
| N | -1.86395400 | -0.72130200 | 0.42620700  |
| N | -0.70036900 | 1.58936600  | -0.10023900 |
| C | -1.38666100 | -3.05533700 | 0.97125700  |
| H | -1.09549700 | -3.40895000 | -0.01944300 |
| H | -0.47719200 | -2.72867300 | 1.47657900  |

|    |             |             |             |
|----|-------------|-------------|-------------|
| H  | -1.83569900 | -3.88129200 | 1.52381700  |
| C  | 1.46914600  | 2.67429100  | -0.38406800 |
| H  | 1.86391700  | 2.06537500  | 0.42888100  |
| H  | 1.78154800  | 2.19055100  | -1.31166200 |
| H  | 1.90853200  | 3.67140900  | -0.34199200 |
| Ni | -0.02786700 | -0.30878500 | -0.26175200 |
| C  | 0.97366200  | -1.81565100 | -0.97969800 |
| H  | 1.27483400  | -2.58413900 | -0.26613400 |
| C  | 1.74712100  | -0.58631300 | -1.02549800 |
| H  | 1.88587700  | -0.13174900 | -2.00954300 |
| C  | 0.34788100  | -2.32700300 | -2.19699300 |
| H  | 0.13845900  | -1.57634300 | -2.95959500 |
| C  | -0.00327700 | -3.59944700 | -2.45196700 |
| H  | 0.19285700  | -4.39636800 | -1.74001000 |
| H  | -0.49275400 | -3.87934900 | -3.37814200 |
| C  | 2.89128800  | -0.36481000 | -0.11933300 |
| C  | 2.91772800  | -0.86505300 | 1.19905800  |
| C  | 4.00391900  | 0.38780500  | -0.53923300 |
| C  | 3.99527400  | -0.62397600 | 2.04555900  |
| H  | 2.06707600  | -1.43009700 | 1.56391700  |
| C  | 5.08157900  | 0.63465400  | 0.30839800  |
| H  | 4.01629200  | 0.78776400  | -1.54838500 |
| C  | 5.08718600  | 0.13019400  | 1.60897600  |
| H  | 3.98081500  | -1.02032100 | 3.05572500  |
| H  | 5.92163500  | 1.22104500  | -0.04955100 |
| H  | 5.92436400  | 0.32115900  | 2.27083200  |

### T-d1

Thermal Correction to Free Energy: 0.324632 Hartree

SCF energy: -1132.366318 Hartree

Gibbs free energy: -1132.041686 Hartree

Coordinates:

|   |             |             |            |
|---|-------------|-------------|------------|
| C | -0.64220400 | -2.76255000 | 0.05347800 |
| C | -2.32976300 | -1.14425600 | 0.43706800 |
| C | -3.28233000 | -2.17570500 | 0.60448600 |
| C | -2.89665700 | -3.49092600 | 0.50088400 |
| C | -1.54432100 | -3.79538600 | 0.22276100 |
| H | -4.31547700 | -1.93141700 | 0.81147500 |
| H | -3.62121400 | -4.28652600 | 0.62967300 |
| H | -1.21013200 | -4.82150300 | 0.13974500 |
| C | -2.62531000 | 0.25764200  | 0.55254900 |
| C | -3.89342700 | 0.75971400  | 0.92263000 |
| C | -4.08619700 | 2.11340300  | 1.05669900 |
| H | -4.71032000 | 0.07663300  | 1.11245500 |

|    |             |             |             |
|----|-------------|-------------|-------------|
| C  | -1.77146000 | 2.46238500  | 0.46837400  |
| C  | -2.99763200 | 2.98585300  | 0.83444600  |
| H  | -5.05520400 | 2.50573500  | 1.34225700  |
| H  | -3.11128500 | 4.05606600  | 0.94938800  |
| N  | -1.01184400 | -1.45894300 | 0.15843600  |
| N  | -1.57150900 | 1.12668500  | 0.30651600  |
| C  | 0.80296200  | -3.02714900 | -0.26159300 |
| H  | 1.04395500  | -2.66148500 | -1.26409700 |
| H  | 1.45323100  | -2.49671800 | 0.43974600  |
| H  | 1.03400400  | -4.09165400 | -0.21965800 |
| C  | -0.59376100 | 3.36630300  | 0.23759300  |
| H  | 0.25948400  | 3.03756800  | 0.83580100  |
| H  | -0.28735100 | 3.34270700  | -0.81108100 |
| H  | -0.83183800 | 4.39744200  | 0.49915700  |
| Ni | 0.10365300  | 0.13202100  | -0.20401700 |
| C  | 1.25040400  | 0.42641200  | -1.89989300 |
| H  | 1.59863000  | -0.56835400 | -2.17148400 |
| C  | 1.86188200  | 1.10295900  | -0.83683600 |
| H  | 1.68237800  | 2.16910700  | -0.75086900 |
| C  | 0.40760200  | 1.08308600  | -2.89149000 |
| H  | 0.13459200  | 2.11461500  | -2.68445000 |
| C  | -0.03761900 | 0.50104800  | -4.01443000 |
| H  | 0.21070500  | -0.52834900 | -4.25386300 |
| H  | -0.66307200 | 1.03614000  | -4.71856900 |
| C  | 2.95767700  | 0.59542000  | 0.00309700  |
| C  | 3.59955200  | -0.63789300 | -0.21867000 |
| C  | 3.39142900  | 1.37375200  | 1.09389400  |
| C  | 4.61503800  | -1.07692100 | 0.62478700  |
| H  | 3.30834900  | -1.25709100 | -1.05804300 |
| C  | 4.40842900  | 0.93459200  | 1.93378000  |
| H  | 2.91480400  | 2.33051600  | 1.28085100  |
| C  | 5.02480000  | -0.29765700 | 1.70785400  |
| H  | 5.09336800  | -2.03087000 | 0.43195400  |
| H  | 4.72165200  | 1.55420000  | 2.76682400  |
| H  | 5.81737700  | -0.64229400 | 2.36178900  |

### S-d2

Thermal Correction to Free Energy: 0.327172 Hartree

SCF energy: -1132.378639 Hartree

Gibbs free energy: -1132.051468 Hartree

Coordinates:

|   |            |            |             |
|---|------------|------------|-------------|
| C | 0.10042100 | 2.04604800 | 1.32812900  |
| C | 1.84066100 | 1.69755600 | -0.19124400 |
| C | 1.84781000 | 3.04323400 | -0.55398000 |

|    |             |             |             |
|----|-------------|-------------|-------------|
| C  | 0.93793400  | 3.90485100  | 0.04540100  |
| C  | 0.06828300  | 3.40463100  | 1.00489300  |
| H  | 2.55420600  | 3.42064200  | -1.27907400 |
| H  | 0.92195200  | 4.95477800  | -0.22064700 |
| H  | -0.63468200 | 4.05496100  | 1.50946500  |
| C  | 2.82060500  | 0.71540700  | -0.71057600 |
| C  | 3.78374100  | 1.03902800  | -1.66399600 |
| C  | 4.71470400  | 0.07703900  | -2.03363300 |
| H  | 3.81412200  | 2.02240900  | -2.11026900 |
| C  | 3.66910200  | -1.45063100 | -0.49007400 |
| C  | 4.66697400  | -1.17022100 | -1.42688300 |
| H  | 5.47342800  | 0.30381700  | -2.77265200 |
| H  | 5.39418300  | -1.93356600 | -1.67206400 |
| N  | 0.95759000  | 1.20409300  | 0.71280200  |
| N  | 2.74342000  | -0.52410300 | -0.15831700 |
| C  | -0.81700700 | 1.47403700  | 2.36514300  |
| H  | -1.60630100 | 0.89437900  | 1.88236900  |
| H  | -0.27036000 | 0.79027600  | 3.01595000  |
| H  | -1.27392600 | 2.26355500  | 2.96278100  |
| C  | 3.60168800  | -2.79503500 | 0.17230000  |
| H  | 3.36799400  | -2.68440400 | 1.23107300  |
| H  | 2.80192400  | -3.39487200 | -0.26785000 |
| H  | 4.54436500  | -3.33147300 | 0.05624000  |
| Ni | 1.00975700  | -0.79580300 | 0.79564600  |
| C  | -1.70019600 | -1.48568600 | 0.44911200  |
| H  | -1.47450300 | -1.67506500 | -0.59953400 |
| C  | -2.92160400 | -0.99447400 | 0.77466000  |
| H  | -3.14896300 | -0.85712100 | 1.83066400  |
| C  | -0.61661500 | -1.77557500 | 1.36487900  |
| H  | -0.85363300 | -1.66455900 | 2.42411400  |
| C  | 0.49008000  | -2.62297900 | 0.98223700  |
| H  | 0.41993900  | -3.18236600 | 0.04542200  |
| H  | 0.99740700  | -3.18713600 | 1.76578200  |
| C  | -3.99577800 | -0.62617200 | -0.14441600 |
| C  | -5.25150100 | -0.25121200 | 0.37604800  |
| C  | -3.85314600 | -0.61406600 | -1.54873700 |
| C  | -6.30966200 | 0.10443400  | -0.45544700 |
| H  | -5.39210400 | -0.24367200 | 1.45258100  |
| C  | -4.91160200 | -0.26206100 | -2.37813100 |
| H  | -2.90105900 | -0.87557600 | -1.99609500 |
| C  | -6.15011500 | 0.09974800  | -1.84115500 |
| H  | -7.26228900 | 0.38642100  | -0.01944800 |
| H  | -4.76895500 | -0.26316400 | -3.45375100 |
| H  | -6.97168000 | 0.37690800  | -2.49172100 |



**T-d2**

Thermal Correction to Free Energy: 0.323991 Hartree

SCF energy: -1132.369275 Hartree

Gibbs free energy: -1132.045283 Hartree

Coordinates:

|    |             |             |             |
|----|-------------|-------------|-------------|
| C  | 0.41566800  | 2.50426700  | -0.55882600 |
| C  | 2.39788400  | 1.54668900  | 0.31499900  |
| C  | 2.86279400  | 2.82899500  | 0.67564800  |
| C  | 2.09155400  | 3.93837600  | 0.41475300  |
| C  | 0.83503500  | 3.77273800  | -0.20948200 |
| H  | 3.82150800  | 2.94175300  | 1.16356100  |
| H  | 2.44008200  | 4.92646900  | 0.69108500  |
| H  | 0.19984300  | 4.62472400  | -0.41527600 |
| C  | 3.11244700  | 0.32239200  | 0.57251900  |
| C  | 4.38005400  | 0.27390600  | 1.19086000  |
| C  | 4.98205000  | -0.93956800 | 1.42891100  |
| H  | 4.87800700  | 1.18978000  | 1.47901200  |
| C  | 3.07258900  | -2.03514100 | 0.44061100  |
| C  | 4.30893000  | -2.12131800 | 1.05573400  |
| H  | 5.95547700  | -0.98763600 | 1.90264200  |
| H  | 4.74619900  | -3.09297500 | 1.24640800  |
| N  | 1.17774100  | 1.40219200  | -0.31769400 |
| N  | 2.47610200  | -0.84145600 | 0.17846900  |
| C  | -0.91271300 | 2.26581100  | -1.21714400 |
| H  | -1.45778000 | 3.19700200  | -1.37195500 |
| H  | -0.77533200 | 1.77697100  | -2.18689300 |
| H  | -1.52390100 | 1.59821800  | -0.60248200 |
| C  | 2.32308800  | -3.27740600 | 0.05048300  |
| H  | 1.36061400  | -3.31458700 | 0.56685300  |
| H  | 2.12073100  | -3.28754400 | -1.02225500 |
| H  | 2.88792200  | -4.17420400 | 0.30518600  |
| Ni | 0.76369200  | -0.45590100 | -0.82021500 |
| C  | -1.92308500 | -1.24312900 | -0.97522500 |
| H  | -2.18297700 | -0.48407600 | -1.70753200 |
| C  | -0.68193500 | -1.94791700 | -1.21681900 |
| H  | -0.46744300 | -2.78749400 | -0.56202400 |
| C  | 0.13042700  | -1.72120800 | -2.32881300 |
| H  | -0.21437900 | -1.06834600 | -3.12799800 |
| H  | 0.90953500  | -2.42203600 | -2.60103000 |
| C  | -2.74020700 | -1.47119100 | 0.08117300  |
| H  | -2.44815400 | -2.24553200 | 0.78770700  |
| C  | -3.98218400 | -0.77301700 | 0.39267400  |
| C  | -4.72729000 | -1.16984800 | 1.52056800  |

|   |             |             |             |
|---|-------------|-------------|-------------|
| C | -4.48175200 | 0.29944700  | -0.37615100 |
| C | -5.91553300 | -0.53203900 | 1.86366200  |
| H | -4.36334400 | -1.99029200 | 2.13055000  |
| C | -5.66812600 | 0.93461600  | -0.03210000 |
| H | -3.93865000 | 0.64131800  | -1.24898100 |
| C | -6.39478200 | 0.52426100  | 1.08904000  |
| H | -6.46813300 | -0.85982600 | 2.73722300  |
| H | -6.02978000 | 1.75693100  | -0.63962800 |
| H | -7.31978900 | 1.02316700  | 1.35397800  |

### S-TS1

Thermal Correction to Free Energy: 0.339283 Hartree

SCF energy: -1320.985834 Hartree

Gibbs free energy: -1320.646551 Hartree

Coordinates:

|    |             |             |             |
|----|-------------|-------------|-------------|
| C  | -2.38485000 | -1.96917400 | 0.99170800  |
| C  | -2.80840800 | 0.21606500  | 0.25420800  |
| C  | -4.17806200 | -0.01501100 | 0.21978400  |
| C  | -4.65467300 | -1.27492000 | 0.56584400  |
| C  | -3.75616600 | -2.24132500 | 0.99034900  |
| H  | -4.86475000 | 0.77508800  | -0.04702700 |
| H  | -5.71735200 | -1.48216400 | 0.54304000  |
| H  | -4.10069200 | -3.20917200 | 1.33094000  |
| C  | -2.20140500 | 1.55715800  | 0.09291800  |
| C  | -2.92623600 | 2.71586200  | -0.15571400 |
| C  | -2.25748600 | 3.93724600  | -0.11577900 |
| H  | -3.98633700 | 2.68033300  | -0.36151600 |
| C  | -0.22260100 | 2.76387600  | 0.42368800  |
| C  | -0.91008000 | 3.96454500  | 0.20676000  |
| H  | -2.79567600 | 4.85747300  | -0.30742100 |
| H  | -0.37762800 | 4.90304000  | 0.29508100  |
| N  | -1.92621500 | -0.77597300 | 0.56416600  |
| N  | -0.86414900 | 1.58928900  | 0.31774000  |
| C  | -1.40860400 | -2.98076000 | 1.50919300  |
| H  | -0.53094300 | -2.48382300 | 1.91964600  |
| H  | -1.87677500 | -3.58846000 | 2.28468600  |
| H  | -1.08388200 | -3.64626000 | 0.70886000  |
| C  | 1.22561200  | 2.76997500  | 0.81745700  |
| H  | 1.57435100  | 1.76775600  | 1.05858300  |
| H  | 1.84170000  | 3.14817000  | 0.00189300  |
| H  | 1.36266000  | 3.41641200  | 1.68853500  |
| Ni | -0.18474700 | -0.25772900 | -0.07974900 |
| C  | 0.04393800  | -2.54544600 | -1.76357700 |
| H  | -0.23547200 | -1.91234000 | -2.60136300 |

|   |             |             |             |
|---|-------------|-------------|-------------|
| C | 0.70572500  | -1.84243500 | -0.65322400 |
| H | 0.99301200  | -2.50327000 | 0.16466800  |
| C | 1.77400400  | -0.84453400 | -1.03147900 |
| C | 1.18820900  | 0.63128800  | -1.81890600 |
| O | 2.02161500  | 1.52653900  | -1.83268400 |
| O | 0.09322700  | 0.48005800  | -2.39216600 |
| C | -0.23324300 | -3.85489500 | -1.80984200 |
| H | -0.74674900 | -4.29499600 | -2.65755100 |
| H | 0.05355600  | -4.53005300 | -1.00878600 |
| H | 2.20370800  | -1.13977700 | -1.99318600 |
| C | 2.88749700  | -0.60029700 | -0.05301000 |
| C | 4.15808300  | -0.24773900 | -0.52688300 |
| C | 2.70735600  | -0.68953500 | 1.33432400  |
| C | 5.20901000  | 0.01042400  | 0.34953400  |
| H | 4.31580000  | -0.16266600 | -1.59579200 |
| C | 3.75642100  | -0.43433400 | 2.21578100  |
| H | 1.73365100  | -0.95027600 | 1.73557900  |
| C | 5.01358200  | -0.08060400 | 1.72789800  |
| H | 6.18221700  | 0.28312800  | -0.04408600 |
| H | 3.58815000  | -0.50859700 | 3.28456900  |
| H | 5.83022000  | 0.12051600  | 2.41200100  |

### S-TS2

Thermal Correction to Free Energy: 0.336902 Hartree

SCF energy: -1320.992750 Hartree

Gibbs free energy: -1320.655848 Hartree

Coordinates:

|   |             |             |             |
|---|-------------|-------------|-------------|
| C | -0.54728800 | 1.82078900  | 1.28576000  |
| C | 1.29483500  | 1.90527300  | -0.15924300 |
| C | 0.86147100  | 3.10088000  | -0.71540500 |
| C | -0.33548700 | 3.65356500  | -0.26674000 |
| C | -1.02066000 | 3.02972600  | 0.76244200  |
| H | 1.44316800  | 3.59698600  | -1.47903300 |
| H | -0.70499400 | 4.57702900  | -0.69521000 |
| H | -1.91957600 | 3.46667500  | 1.17833800  |
| C | 2.61776100  | 1.29905700  | -0.43678400 |
| C | 3.63164000  | 1.92669000  | -1.15358000 |
| C | 4.88360200  | 1.32074500  | -1.19398200 |
| H | 3.46474400  | 2.87334700  | -1.64739500 |
| C | 4.03626500  | -0.45701400 | 0.19275100  |
| C | 5.09675500  | 0.14002800  | -0.49380600 |
| H | 5.69366700  | 1.78538100  | -1.74282700 |
| H | 6.07471900  | -0.32286900 | -0.47120900 |
| N | 0.55332000  | 1.23892700  | 0.77349100  |

|    |             |             |             |
|----|-------------|-------------|-------------|
| N  | 2.81664700  | 0.10817000  | 0.17131300  |
| C  | -1.21158400 | 1.20868300  | 2.48168100  |
| H  | -0.76233000 | 0.25133200  | 2.72838000  |
| H  | -1.08735300 | 1.88393100  | 3.33384900  |
| H  | -2.28079900 | 1.07728900  | 2.31602000  |
| C  | 4.20025300  | -1.71546800 | 0.99152400  |
| H  | 3.68846000  | -2.53507600 | 0.48409100  |
| H  | 5.25351500  | -1.96771600 | 1.11501900  |
| H  | 3.74237200  | -1.59037100 | 1.97580800  |
| Ni | 1.04671100  | -0.64393800 | 0.65797500  |
| C  | -1.68351700 | -1.39103900 | 0.24037900  |
| H  | -1.52353600 | -1.34478400 | -0.83260900 |
| C  | -0.49770100 | -1.73204500 | 1.01403300  |
| H  | -0.65967200 | -1.83604300 | 2.08870400  |
| C  | 0.49778400  | -2.66851000 | 0.42508600  |
| C  | 1.35210400  | -2.18237200 | -1.09832300 |
| O  | 2.35853300  | -2.86233800 | -1.25339300 |
| O  | 0.69663900  | -1.42189600 | -1.81380600 |
| C  | -2.89313500 | -1.09834600 | 0.75940400  |
| H  | -3.02380600 | -1.19035900 | 1.83573900  |
| H  | 0.03564200  | -3.44141000 | -0.19039500 |
| H  | 1.17220000  | -3.15641300 | 1.12847500  |
| C  | -4.07923000 | -0.65296300 | 0.02605700  |
| C  | -5.30105300 | -0.52244300 | 0.71229200  |
| C  | -4.06412000 | -0.33013100 | -1.34577200 |
| C  | -6.45774400 | -0.10239600 | 0.06049300  |
| H  | -5.33780700 | -0.75804000 | 1.77121700  |
| C  | -5.21929500 | 0.08678900  | -1.99617500 |
| H  | -3.13863800 | -0.39685800 | -1.90556800 |
| C  | -6.42514800 | 0.20286900  | -1.29941000 |
| H  | -7.38506100 | -0.01300800 | 0.61579800  |
| H  | -5.17998400 | 0.32966500  | -3.05256400 |
| H  | -7.32303300 | 0.53156200  | -1.81005800 |

### S-In1

Thermal Correction to Free Energy: 0.342635 Hartree

SCF energy: -1321.038539 Hartree

Gibbs free energy: -1320.695903 Hartree

Coordinates:

|   |            |             |             |
|---|------------|-------------|-------------|
| C | 0.38967300 | -2.58623200 | -0.54599400 |
| C | 2.37467500 | -1.39420600 | -0.18433700 |
| C | 3.11448300 | -2.56656900 | -0.10073300 |
| C | 2.45409800 | -3.78654200 | -0.21154100 |
| C | 1.09362300 | -3.79299400 | -0.46987500 |

|    |             |             |             |
|----|-------------|-------------|-------------|
| H  | 4.18764700  | -2.53612600 | 0.01908700  |
| H  | 3.00685000  | -4.71514000 | -0.14057600 |
| H  | 0.56148000  | -4.72190700 | -0.63033700 |
| C  | 2.99237800  | -0.04800100 | -0.25092300 |
| C  | 4.34598300  | 0.18773600  | -0.02709000 |
| C  | 4.83978600  | 1.47017200  | -0.23921900 |
| H  | 5.00239100  | -0.60332600 | 0.30587800  |
| C  | 2.62578200  | 2.17455200  | -0.88137600 |
| C  | 3.98165300  | 2.46232300  | -0.69260400 |
| H  | 5.88745700  | 1.68563000  | -0.06803800 |
| H  | 4.34812600  | 3.45899300  | -0.90169400 |
| N  | 1.02046600  | -1.41495600 | -0.33020900 |
| N  | 2.14689300  | 0.94272900  | -0.62568200 |
| C  | -1.06099500 | -2.59551100 | -0.93897300 |
| H  | -1.43847400 | -1.58926600 | -1.10344900 |
| H  | -1.17214900 | -3.17129500 | -1.86150300 |
| H  | -1.67547500 | -3.08245100 | -0.17792300 |
| C  | 1.66887000  | 3.20364300  | -1.40513000 |
| H  | 1.25494100  | 2.86521700  | -2.35973600 |
| H  | 0.83172500  | 3.31910000  | -0.71624200 |
| H  | 2.16788100  | 4.16018600  | -1.55982400 |
| Ni | 0.24065100  | 0.33453300  | 0.05733800  |
| C  | -0.30524200 | -0.23265300 | 2.62166200  |
| H  | -0.11395700 | 0.76196800  | 3.02434500  |
| C  | -1.09434800 | -0.28287300 | 1.37084400  |
| H  | -1.44995900 | -1.29353700 | 1.17878700  |
| C  | -2.24182300 | 0.74417200  | 1.29590000  |
| C  | -1.61371000 | 2.11932000  | 1.04061000  |
| O  | -2.15262300 | 3.17247300  | 1.35598900  |
| O  | -0.45554200 | 2.04767000  | 0.43549400  |
| C  | 0.21404600  | -1.28991800 | 3.26234000  |
| H  | 0.81698300  | -1.17572500 | 4.15627000  |
| H  | 0.05844900  | -2.30127800 | 2.89702000  |
| H  | -2.79930500 | 0.79733700  | 2.23780700  |
| C  | -3.22537700 | 0.37810500  | 0.19488500  |
| C  | -4.37538500 | -0.35426900 | 0.50636100  |
| C  | -2.97801400 | 0.69007100  | -1.14797700 |
| C  | -5.25221500 | -0.77278200 | -0.49429100 |
| H  | -4.58204900 | -0.60410800 | 1.54205900  |
| C  | -3.85366800 | 0.27692200  | -2.15044500 |
| H  | -2.08787200 | 1.25192600  | -1.40818400 |
| C  | -4.99327100 | -0.45998700 | -1.82825000 |
| H  | -6.13735900 | -1.34153200 | -0.23109800 |
| H  | -3.64389400 | 0.52952900  | -3.18410400 |

|   |             |             |             |
|---|-------------|-------------|-------------|
| H | -5.67386200 | -0.78355400 | -2.60769200 |
|---|-------------|-------------|-------------|

### S-In2

Thermal Correction to Free Energy: 0.340738 Hartree

SCF energy: -1321.047341 Hartree

Gibbs free energy: -1320.706604 Hartree

Coordinates:

|    |             |             |             |
|----|-------------|-------------|-------------|
| C  | 1.08593000  | -2.94646000 | 0.38300700  |
| C  | -0.48481200 | -1.41428100 | 1.20715400  |
| C  | -1.42465100 | -2.41592900 | 1.41190100  |
| C  | -1.09284000 | -3.72206800 | 1.06355900  |
| C  | 0.17357700  | -3.99042700 | 0.56684100  |
| H  | -2.38507000 | -2.18970200 | 1.85178100  |
| H  | -1.80837300 | -4.52262900 | 1.20539500  |
| H  | 0.47285600  | -5.00131300 | 0.32132600  |
| C  | -0.67749100 | -0.00897100 | 1.61821800  |
| C  | -1.92491900 | 0.53952900  | 1.89642600  |
| C  | -1.98480100 | 1.85437500  | 2.34271500  |
| H  | -2.82759500 | -0.03396400 | 1.74014100  |
| C  | 0.42093300  | 1.96884100  | 2.19942700  |
| C  | -0.80379800 | 2.56263200  | 2.52141900  |
| H  | -2.94127100 | 2.31619500  | 2.55493600  |
| H  | -0.81841100 | 3.57580500  | 2.90213100  |
| N  | 0.72962500  | -1.67998900 | 0.66280700  |
| N  | 0.46983000  | 0.71045000  | 1.71858200  |
| C  | 2.47736000  | -3.22514900 | -0.10994000 |
| H  | 3.09331000  | -2.32813500 | -0.06890900 |
| H  | 2.93556600  | -4.00315900 | 0.50542100  |
| H  | 2.45873800  | -3.59057600 | -1.14002500 |
| C  | 1.72065100  | 2.69094700  | 2.39484400  |
| H  | 2.25682200  | 2.75220200  | 1.44689500  |
| H  | 1.55793300  | 3.68941200  | 2.80078400  |
| H  | 2.35379300  | 2.12851600  | 3.08735900  |
| Ni | 1.66129000  | -0.05728900 | 0.19377400  |
| C  | 0.32126000  | 0.19642900  | -1.88321900 |
| H  | 0.30896000  | 1.28491700  | -1.90393600 |
| C  | 1.64378800  | -0.41834500 | -1.74262800 |
| H  | 1.64746400  | -1.48080400 | -1.98192000 |
| C  | 2.82739900  | 0.34736000  | -2.31978000 |
| C  | 3.14090600  | 1.55777600  | -1.44549600 |
| O  | 3.79057100  | 2.51949500  | -1.83776500 |
| O  | 2.66649500  | 1.45528200  | -0.22868400 |
| C  | -0.85891600 | -0.46903200 | -1.85562800 |
| H  | -0.82181800 | -1.55608300 | -1.81629600 |

|   |             |             |             |
|---|-------------|-------------|-------------|
| H | 2.68788800  | 0.66758600  | -3.35834000 |
| H | 3.72003400  | -0.28695500 | -2.30195500 |
| C | -2.19092900 | 0.11043300  | -1.71191800 |
| C | -3.28247700 | -0.74443400 | -1.46348600 |
| C | -2.44660700 | 1.49651300  | -1.74607800 |
| C | -4.56274500 | -0.24272900 | -1.24473200 |
| H | -3.11245100 | -1.81559300 | -1.42495900 |
| C | -3.72492900 | 1.99590700  | -1.53090400 |
| H | -1.63577100 | 2.19055300  | -1.93399300 |
| C | -4.79369000 | 1.13201800  | -1.27493200 |
| H | -5.38085500 | -0.92719500 | -1.04790200 |
| H | -3.89115800 | 3.06743800  | -1.55882200 |
| H | -5.78862200 | 1.52652300  | -1.10355200 |

### Ni-CO<sub>2</sub>

Thermal Correction to Free Energy: 0.182684 Hartree

SCF energy: -933.843409 Hartree

Gibbs free energy: -933.660726 Hartree

Coordinates:

|   |             |             |             |
|---|-------------|-------------|-------------|
| C | -2.65809600 | -0.69348800 | 0.09402700  |
| C | -1.30326000 | 1.20811700  | -0.03952800 |
| C | -2.41250300 | 2.04648000  | -0.12167200 |
| C | -3.68061400 | 1.47775200  | -0.09202900 |
| C | -3.80575900 | 0.09963100  | 0.02012500  |
| H | -2.29985600 | 3.11745400  | -0.20605200 |
| H | -4.56054800 | 2.10629000  | -0.15379600 |
| H | -4.78090400 | -0.36869400 | 0.05020700  |
| C | 0.09531600  | 1.69253400  | -0.03715400 |
| C | 0.42614500  | 3.04259800  | -0.09279900 |
| C | 1.76440100  | 3.41111200  | -0.05416600 |
| H | -0.34357500 | 3.79723700  | -0.16065300 |
| C | 2.35262000  | 1.07751500  | 0.10616000  |
| C | 2.72962400  | 2.42176500  | 0.05352300  |
| H | 2.04633700  | 4.45584300  | -0.09846100 |
| H | 3.78013800  | 2.67631100  | 0.10012400  |
| N | -1.43394600 | -0.13310800 | 0.06061200  |
| N | 1.04817700  | 0.72349500  | 0.04463500  |
| C | -2.73239100 | -2.18633100 | 0.21234800  |
| H | -2.22839100 | -2.65727600 | -0.63387100 |
| H | -2.20161800 | -2.51994600 | 1.10667800  |
| H | -3.76652200 | -2.52661300 | 0.25623800  |
| C | 3.38342900  | 0.00018400  | 0.24518300  |
| H | 3.17260900  | -0.61059000 | 1.12480800  |
| H | 3.35431700  | -0.68304900 | -0.60367100 |

|    |            |             |             |
|----|------------|-------------|-------------|
| H  | 4.38056200 | 0.43134000  | 0.33341800  |
| Ni | 0.35083700 | -1.07299200 | 0.00979500  |
| C  | 1.46943700 | -2.50610400 | -0.15322600 |
| O  | 2.55858700 | -3.03306000 | -0.27499200 |
| O  | 0.26070000 | -2.94916800 | -0.09634900 |

### S-TS1'

Thermal Correction to Free Energy: 0.337981 Hartree

SCF energy: -1320.983054 Hartree

Gibbs free energy: -1320.645073 Hartree

Coordinates:

|    |             |             |             |
|----|-------------|-------------|-------------|
| C  | -1.19422800 | 1.95929100  | 1.33573800  |
| C  | 0.75285100  | 2.16961400  | 0.06339000  |
| C  | 0.34351100  | 3.39646300  | -0.44682500 |
| C  | -0.88257200 | 3.91357900  | -0.03947100 |
| C  | -1.64488000 | 3.19948300  | 0.87154400  |
| H  | 0.95863700  | 3.93414000  | -1.15449800 |
| H  | -1.23012800 | 4.86414100  | -0.42508800 |
| H  | -2.59210500 | 3.58552600  | 1.22549100  |
| C  | 2.06266400  | 1.56045300  | -0.24836700 |
| C  | 3.13532100  | 2.26243600  | -0.78480400 |
| C  | 4.35931600  | 1.61361000  | -0.91939300 |
| H  | 3.03054200  | 3.30043200  | -1.06631500 |
| C  | 3.38529600  | -0.34887200 | 0.08883200  |
| C  | 4.48991700  | 0.31363800  | -0.45533500 |
| H  | 5.20861000  | 2.13436000  | -1.34422100 |
| H  | 5.44364600  | -0.19731400 | -0.49118800 |
| N  | -0.02128200 | 1.44554900  | 0.91725100  |
| N  | 2.18225700  | 0.25776900  | 0.11781500  |
| C  | -2.00810600 | 1.15082700  | 2.29655000  |
| H  | -2.68113400 | 1.78868300  | 2.87072200  |
| H  | -2.60260000 | 0.40962400  | 1.75753700  |
| H  | -1.35853600 | 0.59836800  | 2.97597700  |
| C  | 3.54199900  | -1.70015100 | 0.72308400  |
| H  | 2.58848600  | -2.07974700 | 1.08427000  |
| H  | 3.96739000  | -2.41843700 | 0.02215700  |
| H  | 4.22820700  | -1.60830400 | 1.57059900  |
| Ni | 0.50345800  | -0.53022000 | 0.57697900  |
| C  | 1.11453600  | -2.94516800 | -0.99976100 |
| H  | 1.00538600  | -3.66023800 | -0.18729700 |
| C  | 1.99067100  | -3.19396100 | -1.98159400 |
| H  | 2.13183400  | -2.49736100 | -2.80301400 |
| C  | 0.28386600  | -1.74497200 | -0.90421000 |
| H  | 0.35091900  | -1.11500900 | -1.79334500 |



|   |             |             |             |
|---|-------------|-------------|-------------|
| C | -1.06373400 | -1.97709300 | 1.50454100  |
| O | -2.18916000 | -1.92974700 | 1.97277000  |
| O | 0.05077000  | -2.27829600 | 1.97809100  |
| C | -1.07573000 | -1.88328500 | -0.30723500 |
| H | -1.36860400 | -2.93633300 | -0.30493700 |
| H | 2.59977200  | -4.09071900 | -1.98624900 |
| C | -2.20556900 | -1.04704300 | -0.83320800 |
| C | -2.00945700 | 0.20373500  | -1.43525200 |
| C | -3.52235500 | -1.51178100 | -0.70454000 |
| C | -3.08633100 | 0.96474400  | -1.88415700 |
| H | -1.00792700 | 0.59943000  | -1.54676300 |
| C | -4.60190600 | -0.75367300 | -1.15081800 |
| H | -3.69639300 | -2.47095500 | -0.23213800 |
| C | -4.39005400 | 0.49245200  | -1.74150500 |
| H | -2.90304500 | 1.93211700  | -2.33844400 |
| H | -5.61037600 | -1.13646300 | -1.03694200 |
| H | -5.22927600 | 1.08538100  | -2.08730000 |

### S-TS2'

Thermal Correction to Free Energy: 0.337319 Hartree

SCF energy: -1320.989297 Hartree

Gibbs free energy: -1320.651978 Hartree

Coordinates:

|   |             |             |             |
|---|-------------|-------------|-------------|
| C | 4.11702400  | -0.11754100 | 0.16762500  |
| C | 2.53694700  | 1.60294700  | 0.20764100  |
| C | 3.40780000  | 2.44821700  | 0.88919200  |
| C | 4.67430000  | 1.97908000  | 1.21864300  |
| C | 5.03590100  | 0.69329800  | 0.84018100  |
| H | 3.10481700  | 3.44800900  | 1.16644300  |
| H | 5.37096700  | 2.61354200  | 1.75269400  |
| H | 6.02544700  | 0.31034600  | 1.05459100  |
| C | 1.19518200  | 2.02552100  | -0.24752800 |
| C | 0.77687400  | 3.34992900  | -0.30978500 |
| C | -0.47148400 | 3.63296200  | -0.85626200 |
| H | 1.41566000  | 4.14872100  | 0.03866200  |
| C | -0.76704100 | 1.28254400  | -1.30340400 |
| C | -1.23420300 | 2.59790300  | -1.37613800 |
| H | -0.82546500 | 4.65538500  | -0.90522000 |
| H | -2.18654500 | 2.79184800  | -1.85281400 |
| N | 2.87548400  | 0.32637000  | -0.11742400 |
| N | 0.40183200  | 1.01560900  | -0.68735900 |
| C | 4.47436800  | -1.50338800 | -0.27488800 |
| H | 5.54700500  | -1.67828500 | -0.18805900 |
| H | 3.94266400  | -2.25349000 | 0.31387200  |

|    |             |             |             |
|----|-------------|-------------|-------------|
| H  | 4.16766400  | -1.65532400 | -1.31208100 |
| C  | -1.51283000 | 0.16893100  | -1.97988400 |
| H  | -1.07526300 | -0.80047600 | -1.75017300 |
| H  | -2.56603700 | 0.17069100  | -1.69595000 |
| H  | -1.45858900 | 0.32307300  | -3.06243000 |
| Ni | 1.08346200  | -0.71397800 | -0.24161700 |
| C  | -1.54656500 | -1.23531500 | 0.87912700  |
| H  | -1.85084200 | -2.08270300 | 0.27027800  |
| C  | -2.44591300 | -0.28736000 | 1.22415000  |
| H  | -2.09112000 | 0.54503600  | 1.82923400  |
| C  | -0.13778800 | -1.16072100 | 1.20189100  |
| H  | 0.11351100  | -0.41091600 | 1.95450000  |
| C  | -3.85285200 | -0.22072000 | 0.83953500  |
| C  | -4.64275100 | 0.84307700  | 1.31643100  |
| C  | -4.46923000 | -1.15902500 | -0.01339400 |
| C  | -5.98470600 | 0.96276800  | 0.96730900  |
| H  | -4.19024800 | 1.58302900  | 1.96878100  |
| C  | -5.80975400 | -1.03918100 | -0.36035500 |
| H  | -3.89488700 | -1.98700900 | -0.41153400 |
| C  | -6.57802600 | 0.02114800  | 0.12691700  |
| H  | -6.56766900 | 1.79293100  | 1.35085700  |
| H  | -6.25929500 | -1.77522400 | -1.01791800 |
| H  | -7.62263400 | 0.11165400  | -0.14773600 |
| C  | 1.33385800  | -2.94183600 | -0.42919300 |
| O  | 2.24957100  | -3.73596600 | -0.25618500 |
| O  | 0.61928400  | -2.65566000 | -1.41015200 |
| C  | 0.72570100  | -2.35498700 | 1.15278600  |
| H  | 1.56406900  | -2.36695000 | 1.84358500  |
| H  | 0.15893700  | -3.28285300 | 1.24626800  |

### S-In1'

Thermal Correction to Free Energy: 0.342594 Hartree

SCF energy: -1321.035359 Hartree

Gibbs free energy: -1320.692765 Hartree

Coordinates:

|   |            |             |             |
|---|------------|-------------|-------------|
| C | 2.43983900 | 2.32937400  | -0.07166100 |
| C | 2.42787700 | 0.11540200  | -0.83143100 |
| C | 3.30537100 | 0.41487800  | -1.86868200 |
| C | 3.75414400 | 1.72541400  | -1.99921900 |
| C | 3.34141400 | 2.68088000  | -1.08232700 |
| H | 3.64810100 | -0.34893800 | -2.55134200 |
| H | 4.43924400 | 1.98831600  | -2.79591900 |
| H | 3.71012300 | 3.69721000  | -1.13576800 |
| C | 1.98804600 | -1.25756900 | -0.49153600 |

|    |             |             |             |
|----|-------------|-------------|-------------|
| C  | 2.40349800  | -2.38171000 | -1.19277300 |
| C  | 2.06600900  | -3.64183900 | -0.70833200 |
| H  | 2.99317400  | -2.28457100 | -2.09255600 |
| C  | 0.97217300  | -2.57309400 | 1.15510800  |
| C  | 1.38310800  | -3.73493600 | 0.49172900  |
| H  | 2.36929500  | -4.53297200 | -1.24368400 |
| H  | 1.16327800  | -4.69742700 | 0.93570400  |
| N  | 1.97829500  | 1.07023400  | 0.01578200  |
| N  | 1.20948000  | -1.35605300 | 0.62676900  |
| C  | 1.97992400  | 3.33458800  | 0.94258200  |
| H  | 2.75276200  | 4.08575300  | 1.11251300  |
| H  | 1.07075300  | 3.82753800  | 0.59566700  |
| H  | 1.73334600  | 2.83876700  | 1.88140500  |
| C  | 0.30787900  | -2.67586900 | 2.49373200  |
| H  | 0.24341000  | -1.70386100 | 2.97369100  |
| H  | -0.69915100 | -3.08986500 | 2.40481300  |
| H  | 0.88255300  | -3.35417000 | 3.12909100  |
| Ni | 0.25958200  | 0.38392700  | 0.90673200  |
| C  | -1.69213700 | 0.24890000  | 2.89476600  |
| H  | -1.60913800 | 1.32688700  | 3.03164800  |
| C  | -1.92496900 | -0.50014500 | 3.98040500  |
| H  | -2.03455600 | -1.57812000 | 3.91995800  |
| C  | -1.53814000 | -0.21477600 | 1.49360000  |
| H  | -1.69557000 | -1.29175400 | 1.40975300  |
| C  | -1.91051000 | 1.98067600  | 0.40970800  |
| O  | -2.59524400 | 2.95020600  | 0.10571200  |
| O  | -0.62684400 | 2.03697300  | 0.63480900  |
| C  | -2.48435200 | 0.55781100  | 0.55297400  |
| H  | -3.48337000 | 0.65842500  | 0.99478500  |
| H  | -2.01268600 | -0.05461800 | 4.96558000  |
| C  | -2.67199400 | -0.03349900 | -0.83866800 |
| C  | -1.83990800 | -1.02692700 | -1.36533500 |
| C  | -3.71136500 | 0.45511700  | -1.64384600 |
| C  | -2.03811000 | -1.51732600 | -2.65752200 |
| H  | -1.02907200 | -1.42318800 | -0.76958100 |
| C  | -3.91165200 | -0.03147100 | -2.93242500 |
| H  | -4.35311600 | 1.23615900  | -1.25213200 |
| C  | -3.07342000 | -1.02285100 | -3.44687200 |
| H  | -1.37992700 | -2.28878400 | -3.04243200 |
| H  | -4.72273000 | 0.36134100  | -3.53601800 |
| H  | -3.22909100 | -1.40497400 | -4.44954200 |

**S-In2'**

Thermal Correction to Free Energy: 0.340671 Hartree

SCF energy: -1321.042215 Hartree

Gibbs free energy: -1320.701543 Hartree

Coordinates:

|    |             |             |             |
|----|-------------|-------------|-------------|
| C  | -4.01136400 | 0.85693700  | 0.09907000  |
| C  | -1.95851500 | 1.91812700  | -0.25417300 |
| C  | -2.55021100 | 2.92316300  | -1.01272100 |
| C  | -3.92449000 | 2.87520700  | -1.21942100 |
| C  | -4.66128900 | 1.85180000  | -0.63952600 |
| H  | -1.95768200 | 3.72249900  | -1.43486900 |
| H  | -4.41454800 | 3.63900900  | -1.81084400 |
| H  | -5.73738800 | 1.81392600  | -0.74928700 |
| C  | -0.53430300 | 1.92454200  | 0.14725600  |
| C  | 0.28878100  | 3.03987200  | 0.05971300  |
| C  | 1.54915500  | 2.98764000  | 0.65005900  |
| H  | -0.05246200 | 3.94225000  | -0.42695000 |
| C  | 1.05487100  | 0.75506500  | 1.40793800  |
| C  | 1.91533200  | 1.85633700  | 1.35981300  |
| H  | 2.21616100  | 3.83860800  | 0.58852800  |
| H  | 2.86203300  | 1.80749800  | 1.88145300  |
| N  | -2.67260300 | 0.87898600  | 0.24885800  |
| N  | -0.11434800 | 0.77675500  | 0.74119000  |
| C  | -4.77561700 | -0.23880800 | 0.77995500  |
| H  | -5.84258500 | -0.16077000 | 0.57133700  |
| H  | -4.39519200 | -1.20967400 | 0.46172200  |
| H  | -4.62421900 | -0.17154900 | 1.86158000  |
| C  | 1.38718900  | -0.42489100 | 2.27161300  |
| H  | 0.70214900  | -1.25175700 | 2.09463500  |
| H  | 2.41446600  | -0.75322600 | 2.10501600  |
| H  | 1.29863000  | -0.12512600 | 3.32069900  |
| Ni | -1.29210800 | -0.70096000 | 0.32969800  |
| C  | 1.42017900  | -1.69813100 | -0.48561600 |
| H  | 1.88273800  | -2.36601200 | 0.23789200  |
| C  | 2.17540800  | -0.74175900 | -1.06439400 |
| H  | 1.68352900  | -0.06414300 | -1.76047200 |
| C  | -0.01712600 | -1.87139800 | -0.68108800 |
| H  | -0.32496600 | -1.48020800 | -1.66090000 |
| C  | 3.57584300  | -0.43249800 | -0.78285300 |
| C  | 4.14044200  | 0.73391300  | -1.33326700 |
| C  | 4.39560500  | -1.22078400 | 0.04962400  |
| C  | 5.45349200  | 1.10448600  | -1.05860600 |
| H  | 3.52922700  | 1.36129000  | -1.97394600 |
| C  | 5.70730700  | -0.85012000 | 0.32409500  |
| H  | 4.00693400  | -2.13550500 | 0.48178300  |
| C  | 6.24623100  | 0.31599500  | -0.22498100 |

|   |             |             |             |
|---|-------------|-------------|-------------|
| H | 5.85764200  | 2.01204300  | -1.49377100 |
| H | 6.31527500  | -1.47538800 | 0.96897700  |
| H | 7.26895200  | 0.60194600  | -0.00776100 |
| C | -2.05472400 | -3.25719300 | -0.33890800 |
| O | -2.77735600 | -4.22687600 | -0.53966300 |
| O | -2.50714200 | -2.08777100 | 0.03768800  |
| C | -0.54227000 | -3.29062000 | -0.48183500 |
| H | -0.25902200 | -3.98330900 | -1.28256900 |
| H | -0.14554600 | -3.70981300 | 0.45118400  |

### S-TS3

Thermal Correction to Free Energy: 0.335227 Hartree

SCF energy: -1321.001756 Hartree

Gibbs free energy: -1320.666529 Hartree

Coordinates:

|    |             |             |             |
|----|-------------|-------------|-------------|
| C  | -0.34114200 | 2.97098800  | 0.09222900  |
| C  | 1.15825900  | 1.47599700  | 1.08969800  |
| C  | 2.01598700  | 2.52004400  | 1.43757000  |
| C  | 1.67780400  | 3.81970400  | 1.08590500  |
| C  | 0.48539900  | 4.04788900  | 0.40759300  |
| H  | 2.92223900  | 2.32000300  | 1.99216400  |
| H  | 2.32920800  | 4.64499700  | 1.34700600  |
| H  | 0.19049800  | 5.04952000  | 0.12239700  |
| C  | 1.44544000  | 0.06326800  | 1.44338500  |
| C  | 2.73998800  | -0.40270200 | 1.67317400  |
| C  | 2.91516000  | -1.74657100 | 1.98396400  |
| H  | 3.59396800  | 0.25295500  | 1.57442800  |
| C  | 0.53672300  | -2.04432300 | 1.79844100  |
| C  | 1.80431300  | -2.57838600 | 2.05003900  |
| H  | 3.90969500  | -2.14246900 | 2.15122300  |
| H  | 1.91044000  | -3.63092400 | 2.28325000  |
| N  | 0.00070700  | 1.70709900  | 0.42400800  |
| N  | 0.37099700  | -0.74761200 | 1.50261500  |
| C  | -1.64093400 | 3.15137500  | -0.63635500 |
| H  | -2.45962900 | 2.71665800  | -0.05697400 |
| H  | -1.85336000 | 4.20476600  | -0.82125600 |
| H  | -1.60977000 | 2.61678000  | -1.58970400 |
| C  | -0.70887600 | -2.88595000 | 1.86507300  |
| H  | -1.10166400 | -2.90069900 | 2.88727300  |
| H  | -1.47655300 | -2.45910500 | 1.21982700  |
| H  | -0.50961400 | -3.91805200 | 1.57027300  |
| Ni | -1.04200400 | 0.14650100  | -0.17376000 |
| C  | -1.42401800 | -1.23223300 | -1.55428500 |
| H  | -1.18562600 | -2.23022200 | -1.19461700 |

|   |             |             |             |
|---|-------------|-------------|-------------|
| C | -2.79454600 | -0.92084200 | -1.77123000 |
| H | -2.99769300 | -0.02141800 | -2.35182100 |
| C | -3.87558500 | -1.56465500 | -1.20572700 |
| H | -3.74093600 | -2.52499400 | -0.71501400 |
| H | -4.88050600 | -1.31583300 | -1.51960500 |
| C | -4.00006800 | -0.38367700 | 0.75052200  |
| O | -5.16070700 | -0.32347200 | 0.95531000  |
| O | -2.86025500 | -0.15880200 | 1.03699000  |
| C | -0.38471800 | -0.30792400 | -1.93402800 |
| H | -0.66024400 | 0.47724800  | -2.64143400 |
| C | 1.05689800  | -0.61830100 | -1.92861800 |
| C | 1.58236200  | -1.86646000 | -1.55212900 |
| C | 1.97233800  | 0.39881100  | -2.26015100 |
| C | 2.95619900  | -2.08251800 | -1.50358900 |
| H | 0.91329600  | -2.67382600 | -1.28140300 |
| C | 3.34502100  | 0.18366900  | -2.21042300 |
| H | 1.58980500  | 1.37493700  | -2.54160800 |
| C | 3.84850700  | -1.06184000 | -1.82979800 |
| H | 3.33220700  | -3.05281900 | -1.19775500 |
| H | 4.02490500  | 0.98974400  | -2.46546700 |
| H | 4.91821000  | -1.23231500 | -1.78553100 |

#### S-TS4

Thermal Correction to Free Energy: 0.333662 Hartree

SCF energy: -1320.994755 Hartree

Gibbs free energy: -1320.661093 Hartree

Coordinates:

|   |             |             |             |
|---|-------------|-------------|-------------|
| C | -1.69503600 | 2.73648100  | -0.11083000 |
| C | -3.23306400 | 0.97724300  | -0.21983700 |
| C | -4.27300200 | 1.86181500  | -0.50637700 |
| C | -4.00245300 | 3.22151300  | -0.58570000 |
| C | -2.69967500 | 3.66292800  | -0.38740300 |
| H | -5.27138700 | 1.48877500  | -0.68820100 |
| H | -4.79436900 | 3.92551100  | -0.81094700 |
| H | -2.45391300 | 4.71519000  | -0.44762700 |
| C | -3.44936300 | -0.49113600 | -0.14317700 |
| C | -4.68172700 | -1.05136700 | 0.19425600  |
| C | -4.78432500 | -2.43960800 | 0.24931400  |
| H | -5.53368300 | -0.42824000 | 0.43106300  |
| C | -2.46006300 | -2.58231300 | -0.35026600 |
| C | -3.66680500 | -3.21595100 | -0.02867700 |
| H | -5.72586300 | -2.90603000 | 0.51400300  |
| H | -3.71797300 | -4.29770200 | 0.00321100  |
| N | -1.96669500 | 1.41603800  | -0.02157600 |

|    |             |             |             |
|----|-------------|-------------|-------------|
| N  | -2.36713800 | -1.24841200 | -0.40231700 |
| C  | -0.26799100 | 3.15310600  | 0.09892000  |
| H  | 0.37653100  | 2.66643500  | -0.63803400 |
| H  | -0.15080900 | 4.23380400  | 0.01497800  |
| H  | 0.07583200  | 2.82762100  | 1.08449200  |
| C  | -1.20888900 | -3.36586800 | -0.64358400 |
| H  | -0.87998700 | -3.91221100 | 0.24563800  |
| H  | -1.38294700 | -4.10269800 | -1.43221100 |
| H  | -0.41393700 | -2.68678300 | -0.94969300 |
| Ni | -0.52955300 | 0.11065700  | 0.41185800  |
| C  | 1.77878100  | -0.36981900 | 1.30706700  |
| H  | 1.95502000  | 0.63465700  | 1.68656700  |
| C  | 0.55749300  | -0.96653700 | 1.68830800  |
| H  | 0.42327400  | -2.03146400 | 1.50904800  |
| C  | -0.48737200 | -0.19506900 | 2.31237500  |
| H  | -0.21129800 | 0.69729500  | 2.87693700  |
| H  | -1.33581200 | -0.72932400 | 2.73684900  |
| C  | 1.83512100  | -0.34589700 | -1.56536000 |
| O  | 2.73991500  | -0.37431800 | -2.32323600 |
| O  | 0.66353500  | -0.16916400 | -1.35264300 |
| C  | 2.73207600  | -0.92058400 | 0.44338600  |
| H  | 2.61651900  | -1.97868700 | 0.21271700  |
| C  | 4.09646300  | -0.39672900 | 0.29283500  |
| C  | 5.10541300  | -1.23542400 | -0.21386500 |
| C  | 4.45230600  | 0.93293700  | 0.59233100  |
| C  | 6.40694600  | -0.77759600 | -0.40133400 |
| H  | 4.85867100  | -2.26222500 | -0.46425800 |
| C  | 5.75281000  | 1.39008600  | 0.40717300  |
| H  | 3.70276600  | 1.62383500  | 0.96170900  |
| C  | 6.74313500  | 0.53970500  | -0.09022600 |
| H  | 7.16110800  | -1.45282300 | -0.79184000 |
| H  | 5.99494300  | 2.42009000  | 0.64752200  |
| H  | 7.75543000  | 0.89950800  | -0.23477800 |

### S-In3

Thermal Correction to Free Energy: 0.341963 Hartree

SCF energy: -1321.052295 Hartree

Gibbs free energy: -1320.710332 Hartree

Coordinates:

|   |             |            |             |
|---|-------------|------------|-------------|
| C | -1.28416600 | 2.90213100 | -0.13640700 |
| C | 0.58022000  | 1.91527000 | 0.84338900  |
| C | 1.31468500  | 3.09683900 | 0.74791500  |
| C | 0.70450000  | 4.21470600 | 0.18723500  |
| C | -0.61116000 | 4.12454200 | -0.24583100 |

|    |             |             |             |
|----|-------------|-------------|-------------|
| H  | 2.34074100  | 3.14649600  | 1.08412400  |
| H  | 1.25163000  | 5.14524700  | 0.09519200  |
| H  | -1.11898200 | 4.98301600  | -0.66792400 |
| C  | 1.12737600  | 0.67562100  | 1.45198600  |
| C  | 2.25223700  | 0.67969300  | 2.27570500  |
| C  | 2.68737900  | -0.51919100 | 2.82527300  |
| H  | 2.76955400  | 1.60172200  | 2.49889300  |
| C  | 0.85880600  | -1.63045400 | 1.72663400  |
| C  | 1.98301100  | -1.68417500 | 2.55203600  |
| H  | 3.55970000  | -0.54106600 | 3.46718800  |
| H  | 2.29339000  | -2.63318200 | 2.96948500  |
| N  | -0.68302500 | 1.82312100  | 0.38318600  |
| N  | 0.45310000  | -0.46425900 | 1.18835200  |
| C  | -2.70520900 | 2.74847000  | -0.60406300 |
| H  | -3.15128000 | 1.85807000  | -0.16255600 |
| H  | -3.29956100 | 3.62520700  | -0.33906600 |
| H  | -2.74058800 | 2.64728400  | -1.69352900 |
| C  | 0.06812600  | -2.86108300 | 1.39152500  |
| H  | 0.39010600  | -3.71194300 | 1.99185500  |
| H  | -0.99584100 | -2.67627500 | 1.54604600  |
| H  | 0.20157800  | -3.10988900 | 0.33594900  |
| Ni | -1.07271300 | -0.36261700 | -0.11933000 |
| C  | -1.03873200 | -1.22614900 | -1.88055900 |
| H  | -0.86340300 | -2.29813400 | -1.85965800 |
| C  | -2.32587600 | -0.69907800 | -1.61817900 |
| H  | -2.58304000 | 0.27633000  | -2.02374100 |
| C  | -3.45867300 | -1.54333400 | -1.09352800 |
| H  | -3.27236800 | -2.60818000 | -1.27177800 |
| H  | -4.41864400 | -1.30146100 | -1.55267300 |
| C  | -3.59349000 | -1.37869300 | 0.44184500  |
| O  | -4.61676700 | -1.73350200 | 1.01788700  |
| O  | -2.54966800 | -0.87712400 | 1.03626900  |
| C  | 0.02474200  | -0.28732400 | -1.85850900 |
| H  | -0.20218700 | 0.72352700  | -2.19295600 |
| C  | 1.45940700  | -0.60058500 | -1.80584800 |
| C  | 2.37877300  | 0.46214100  | -1.78691600 |
| C  | 1.96305300  | -1.90795900 | -1.70050400 |
| C  | 3.74409000  | 0.23170900  | -1.64854600 |
| H  | 2.00981800  | 1.47958800  | -1.86062700 |
| C  | 3.32825800  | -2.13911800 | -1.56591600 |
| H  | 1.28657700  | -2.75361600 | -1.72235900 |
| C  | 4.22706200  | -1.07154400 | -1.53255300 |
| H  | 4.43092900  | 1.07055800  | -1.62700000 |
| H  | 3.69270600  | -3.15710100 | -1.48348100 |



H 5.28956700 -1.25456700 -1.42126100

### S-In4

Thermal Correction to Free Energy: 0.340461 Hartree

SCF energy: -1321.039699 Hartree

Gibbs free energy: -1320.699239 Hartree

Coordinates:

|    |             |             |             |
|----|-------------|-------------|-------------|
| C  | -1.04111000 | 2.76531400  | -0.20882100 |
| C  | -2.85162900 | 1.31597000  | -0.05689000 |
| C  | -3.74240400 | 2.37284200  | 0.13343200  |
| C  | -3.23996600 | 3.67036800  | 0.14642700  |
| C  | -1.87990600 | 3.87328800  | -0.04253100 |
| H  | -4.79894400 | 2.19635600  | 0.27882900  |
| H  | -3.90652400 | 4.51143100  | 0.29501100  |
| H  | -1.46262500 | 4.87246800  | -0.06081600 |
| C  | -3.29244100 | -0.10097800 | -0.13918700 |
| C  | -4.61819700 | -0.45903900 | -0.38324100 |
| C  | -4.94457700 | -1.80524300 | -0.48520800 |
| H  | -5.37851300 | 0.29726400  | -0.51564500 |
| C  | -2.63063900 | -2.34437800 | -0.11221600 |
| C  | -3.94263900 | -2.75714500 | -0.35051600 |
| H  | -5.96715800 | -2.10590900 | -0.67861900 |
| H  | -4.16366700 | -3.81348600 | -0.43126700 |
| N  | -1.52733500 | 1.51699100  | -0.19437900 |
| N  | -2.32657600 | -1.03597000 | -0.00717300 |
| C  | 0.44004900  | 2.92789400  | -0.40850300 |
| H  | 0.83979400  | 2.05887300  | -0.92946000 |
| H  | 0.66340500  | 3.83123300  | -0.97864200 |
| H  | 0.95022300  | 3.01220300  | 0.55609300  |
| C  | -1.50915100 | -3.32952000 | 0.04836700  |
| H  | -0.67742600 | -3.05870600 | -0.60486800 |
| H  | -1.13469100 | -3.30318600 | 1.07533300  |
| H  | -1.83963100 | -4.34356000 | -0.17664100 |
| Ni | -0.45135500 | -0.42830400 | 0.35632000  |
| C  | 1.40903000  | -0.21889300 | 0.99236800  |
| H  | 1.57791000  | 0.84805100  | 1.11393100  |
| C  | 0.60699300  | -0.90312700 | 1.93594700  |
| H  | 0.72791300  | -1.97204300 | 2.09507000  |
| C  | -0.56024900 | -0.22997900 | 2.36529400  |
| H  | -0.54495500 | 0.84506900  | 2.52953300  |
| H  | -1.31521600 | -0.77627700 | 2.92014800  |
| C  | 1.65633900  | -0.98699300 | -1.37868100 |
| O  | 2.32815500  | -1.15229700 | -2.39043000 |
| O  | 0.36268900  | -0.88381300 | -1.35776600 |

|   |            |             |             |
|---|------------|-------------|-------------|
| C | 2.33035200 | -0.94606900 | 0.03354000  |
| H | 2.36789500 | -2.00096100 | 0.33007600  |
| C | 3.73781400 | -0.39585800 | 0.02140600  |
| C | 4.00672700 | 0.86323000  | -0.53056800 |
| C | 4.79159300 | -1.10773800 | 0.60047900  |
| C | 5.29255100 | 1.39562200  | -0.50216900 |
| H | 3.20452400 | 1.42426200  | -0.99696600 |
| C | 6.08330000 | -0.57998100 | 0.62898400  |
| H | 4.60046600 | -2.08501700 | 1.03203000  |
| C | 6.33750400 | 0.67488600  | 0.07938800  |
| H | 5.48170500 | 2.37122600  | -0.93638000 |
| H | 6.88828900 | -1.14972500 | 1.08005900  |
| H | 7.33973100 | 1.08784000  | 0.10006500  |

### T-d1-CO<sub>2</sub>

Thermal Correction to Free Energy: 0.331305 Hartree

SCF energy: -1321.012351 Hartree

Gibbs free energy: -1320.681045 Hartree

Coordinates:

|   |             |             |             |
|---|-------------|-------------|-------------|
| C | -0.76995700 | 2.75399400  | -0.32668300 |
| C | -2.46318100 | 1.13866200  | -0.26598100 |
| C | -3.45116700 | 2.12360600  | -0.27761200 |
| C | -3.07088800 | 3.45778000  | -0.32439900 |
| C | -1.71889900 | 3.77601800  | -0.35236800 |
| H | -4.49866800 | 1.86195700  | -0.24734700 |
| H | -3.82118900 | 4.23884800  | -0.33683900 |
| H | -1.39051700 | 4.80670800  | -0.38803100 |
| C | -2.77009900 | -0.31034700 | -0.23809500 |
| C | -4.07142000 | -0.80490500 | -0.32179800 |
| C | -4.27096600 | -2.17854000 | -0.31371700 |
| H | -4.91608600 | -0.13679600 | -0.40302200 |
| C | -1.88728900 | -2.47369900 | -0.15033000 |
| C | -3.16970600 | -3.01960600 | -0.22997700 |
| H | -5.27246800 | -2.58569400 | -0.37978300 |
| H | -3.29079900 | -4.09512900 | -0.22812000 |
| N | -1.14873900 | 1.45971900  | -0.28903600 |
| N | -1.70221800 | -1.13813800 | -0.15109900 |
| C | 0.70093100  | 3.04717200  | -0.31569300 |
| H | 1.22283400  | 2.39304700  | -1.01623000 |
| H | 0.89655500  | 4.08946700  | -0.56732500 |
| H | 1.10883700  | 2.85668800  | 0.68126400  |
| C | -0.67794500 | -3.35677600 | -0.04816800 |
| H | 0.12633700  | -2.96251900 | -0.66920900 |
| H | -0.32918100 | -3.40471800 | 0.98747300  |

|    |             |             |             |
|----|-------------|-------------|-------------|
| H  | -0.91507400 | -4.37337300 | -0.36316400 |
| Ni | 0.09392400  | -0.13595400 | -0.12486800 |
| C  | -0.40326800 | -0.62021300 | 2.68272300  |
| H  | -0.60013700 | -1.68310300 | 2.57353200  |
| C  | 0.72908800  | -0.09319100 | 1.94310400  |
| H  | 0.97202000  | 0.94805100  | 2.13975900  |
| C  | 1.61401500  | -0.87379800 | 1.20133200  |
| C  | 0.99548600  | -0.45111600 | -1.97204800 |
| O  | 0.84416400  | -1.60225400 | -2.37871100 |
| O  | 1.54184700  | 0.57530700  | -2.37438300 |
| C  | -1.20627300 | 0.11728600  | 3.46595900  |
| H  | -2.03980900 | -0.32603700 | 3.99667700  |
| H  | -1.04866900 | 1.18413800  | 3.58966100  |
| H  | 1.44182800  | -1.94618600 | 1.18463100  |
| C  | 2.95073400  | -0.46701200 | 0.73111200  |
| C  | 3.71154200  | -1.38279400 | -0.01664800 |
| C  | 3.50929400  | 0.79556300  | 0.99104300  |
| C  | 4.97061600  | -1.04578500 | -0.50029800 |
| H  | 3.29634400  | -2.36167300 | -0.23096100 |
| C  | 4.76726700  | 1.13453000  | 0.50225700  |
| H  | 2.96302200  | 1.52013300  | 1.58201300  |
| C  | 5.50493800  | 0.21905000  | -0.24907000 |
| H  | 5.53556500  | -1.76941100 | -1.07746700 |
| H  | 5.17569900  | 2.11651300  | 0.71408700  |
| H  | 6.48516600  | 0.48503500  | -0.62746500 |

### T-d2-CO<sub>2</sub>

Thermal Correction to Free Energy: 0.333370 Hartree

SCF energy: -1321.018771 Hartree

Gibbs free energy: -1320.685401 Hartree

Coordinates:

|   |             |             |             |
|---|-------------|-------------|-------------|
| C | 1.48395600  | 2.64472700  | -0.38074000 |
| C | -0.09645900 | 1.12061800  | -1.19082500 |
| C | -0.90893800 | 2.15457500  | -1.65593900 |
| C | -0.49337700 | 3.46674400  | -1.47907500 |
| C | 0.71771700  | 3.71447100  | -0.84407300 |
| H | -1.85576100 | 1.94513600  | -2.13119000 |
| H | -1.10903600 | 4.28607700  | -1.82962100 |
| H | 1.07009100  | 4.72677500  | -0.69397100 |
| C | -0.44986700 | -0.30811800 | -1.34562400 |
| C | -1.52480200 | -0.73956000 | -2.12106100 |
| C | -1.78438300 | -2.10005100 | -2.21095500 |
| H | -2.14669500 | -0.03295200 | -2.65035100 |
| C | 0.10116400  | -2.50623100 | -0.77162300 |

|    |             |             |             |
|----|-------------|-------------|-------------|
| C  | -0.96377000 | -2.99118700 | -1.53286200 |
| H  | -2.61601100 | -2.45877400 | -2.80487500 |
| H  | -1.13937700 | -4.05798600 | -1.58275700 |
| N  | 1.07315100  | 1.37187800  | -0.55625000 |
| N  | 0.34433600  | -1.18397400 | -0.68759800 |
| C  | 2.77175200  | 2.86242400  | 0.35840200  |
| H  | 3.51720400  | 2.12408300  | 0.06060700  |
| H  | 3.15540800  | 3.86926100  | 0.19319600  |
| H  | 2.60803800  | 2.73375800  | 1.43372200  |
| C  | 0.98814000  | -3.43491500 | 0.00505200  |
| H  | 0.91084400  | -4.45394600 | -0.37531800 |
| H  | 2.02409000  | -3.10099000 | -0.05027900 |
| H  | 0.68620200  | -3.44831900 | 1.05686000  |
| Ni | 1.84490300  | -0.26632600 | 0.38874800  |
| C  | -0.39221700 | -0.32531100 | 2.08118100  |
| H  | -0.60626500 | -1.38258400 | 1.96089500  |
| C  | 0.97939700  | 0.01043200  | 2.36445900  |
| H  | 1.18699300  | 1.05266400  | 2.59911100  |
| C  | 2.03119600  | -0.90222900 | 2.40080400  |
| H  | 1.83805500  | -1.96944900 | 2.40340300  |
| H  | 2.99903200  | -0.59427400 | 2.77795200  |
| C  | 3.72489000  | -0.77741000 | -0.29533800 |
| O  | 3.71480700  | -1.76921900 | -1.02041000 |
| O  | 4.56073300  | 0.02985500  | 0.11166300  |
| C  | -1.35849500 | 0.59204000  | 1.83190900  |
| H  | -1.09005800 | 1.64302600  | 1.91482200  |
| C  | -2.70291700 | 0.32402100  | 1.33758000  |
| C  | -3.49837600 | 1.40411400  | 0.90828400  |
| C  | -3.23787100 | -0.97412400 | 1.21265000  |
| C  | -4.76485300 | 1.19929800  | 0.36966800  |
| H  | -3.10358000 | 2.41169300  | 0.98574000  |
| C  | -4.50373800 | -1.17653900 | 0.67869300  |
| H  | -2.65817600 | -1.83272700 | 1.52954500  |
| C  | -5.27620800 | -0.09299700 | 0.25127100  |
| H  | -5.35265800 | 2.04902300  | 0.04053600  |
| H  | -4.89152800 | -2.18539400 | 0.59050500  |
| H  | -6.26247000 | -0.25614000 | -0.16760900 |

### T-TS1

Thermal Correction to Free Energy: 0.334861 Hartree

SCF energy: -1320.990392 Hartree

Gibbs free energy: -1320.655531 Hartree

Coordinates:

|   |            |            |            |
|---|------------|------------|------------|
| C | 1.42858200 | 2.71958400 | 0.59070000 |
|---|------------|------------|------------|

|    |             |             |             |
|----|-------------|-------------|-------------|
| C  | 2.77385700  | 0.87573400  | 0.06493100  |
| C  | 3.81759900  | 1.70885200  | -0.34008300 |
| C  | 3.65053200  | 3.08369500  | -0.25735000 |
| C  | 2.44763800  | 3.59437400  | 0.22018200  |
| H  | 4.73865700  | 1.29646000  | -0.72520300 |
| H  | 4.44741800  | 3.74973700  | -0.56475000 |
| H  | 2.29087700  | 4.66203100  | 0.30261800  |
| C  | 2.86983900  | -0.60127100 | 0.04426600  |
| C  | 4.07970100  | -1.26723300 | -0.14749500 |
| C  | 4.09269700  | -2.65517400 | -0.14203500 |
| H  | 4.99965000  | -0.71721100 | -0.28188600 |
| C  | 1.71718700  | -2.62630800 | 0.24864400  |
| C  | 2.90166000  | -3.33995600 | 0.05654400  |
| H  | 5.02166100  | -3.19378000 | -0.28404100 |
| H  | 2.87717400  | -4.42188900 | 0.06631000  |
| N  | 1.60155000  | 1.38273100  | 0.51192200  |
| N  | 1.71198100  | -1.27786300 | 0.24632600  |
| C  | 0.09772800  | 3.21535000  | 1.07311300  |
| H  | -0.20973300 | 2.68049400  | 1.97196100  |
| H  | 0.12357300  | 4.28679200  | 1.26985000  |
| H  | -0.66688700 | 3.01951700  | 0.31572700  |
| C  | 0.41404900  | -3.34946500 | 0.42035700  |
| H  | -0.26091100 | -2.81622300 | 1.08668400  |
| H  | -0.08628400 | -3.44535800 | -0.54873400 |
| H  | 0.57982700  | -4.35634700 | 0.80477300  |
| Ni | 0.11515300  | 0.00452800  | 0.53334500  |
| C  | 0.23468000  | -0.42028300 | -2.23787900 |
| H  | 0.32021500  | -1.50518900 | -2.21806500 |
| C  | -0.74388500 | 0.15169800  | -1.34365400 |
| H  | -0.98469000 | 1.19712900  | -1.52004300 |
| C  | -1.71766400 | -0.65094800 | -0.62458700 |
| C  | -1.67397800 | -0.63521700 | 1.55156200  |
| O  | -2.13844300 | -1.66356500 | 1.98569200  |
| O  | -1.44180900 | 0.51796200  | 1.96469300  |
| C  | 1.06153800  | 0.26937700  | -3.05167500 |
| H  | 1.78097400  | -0.23585100 | -3.68438100 |
| H  | 1.03536300  | 1.35398500  | -3.09489600 |
| H  | -1.62526700 | -1.72319500 | -0.76509300 |
| C  | -3.13707500 | -0.20519500 | -0.56063800 |
| C  | -4.16064700 | -1.16590900 | -0.54167400 |
| C  | -3.50407800 | 1.14958400  | -0.52382000 |
| C  | -5.50004800 | -0.78967400 | -0.49430200 |
| H  | -3.89689500 | -2.21768800 | -0.55921700 |
| C  | -4.84279000 | 1.52645700  | -0.47203800 |

|   |             |             |             |
|---|-------------|-------------|-------------|
| H | -2.73907300 | 1.91586200  | -0.51651300 |
| C | -5.85003100 | 0.56040500  | -0.45825600 |
| H | -6.27174700 | -1.55181600 | -0.48655600 |
| H | -5.10115300 | 2.57945700  | -0.44087400 |
| H | -6.89228900 | 0.85620900  | -0.42100600 |

### T-TS2

Thermal Correction to Free Energy: 0.335553 Hartree

SCF energy: -1321.005236 Hartree

Gibbs free energy: -1320.669683 Hartree

Coordinates:

|    |             |             |             |
|----|-------------|-------------|-------------|
| C  | 0.89989200  | 2.80662200  | -0.70648500 |
| C  | -0.44278400 | 0.97261700  | -1.26558100 |
| C  | -1.53182000 | 1.80455600  | -1.53186100 |
| C  | -1.38119400 | 3.17412300  | -1.38202000 |
| C  | -0.15123200 | 3.68176100  | -0.97182700 |
| H  | -2.48769700 | 1.39072600  | -1.81637800 |
| H  | -2.21447700 | 3.83913200  | -1.57330900 |
| H  | -0.00247200 | 4.74695500  | -0.85105300 |
| C  | -0.50975800 | -0.49824000 | -1.39954600 |
| C  | -1.56589800 | -1.14514100 | -2.03768400 |
| C  | -1.55490200 | -2.53074200 | -2.12144800 |
| H  | -2.37849100 | -0.58194600 | -2.47216300 |
| C  | 0.54571800  | -2.53704000 | -0.94599500 |
| C  | -0.48930600 | -3.23242300 | -1.57543000 |
| H  | -2.36641800 | -3.05411100 | -2.61199000 |
| H  | -0.44872100 | -4.31275200 | -1.62731000 |
| N  | 0.74673900  | 1.47350000  | -0.85564100 |
| N  | 0.52463100  | -1.19285100 | -0.86237000 |
| C  | 2.23729100  | 3.29613600  | -0.23488000 |
| H  | 3.03319500  | 2.90362400  | -0.86992700 |
| H  | 2.27842800  | 4.38504500  | -0.22839300 |
| H  | 2.43969200  | 2.92630700  | 0.77363900  |
| C  | 1.68583700  | -3.27771400 | -0.30963200 |
| H  | 1.85955800  | -4.22727400 | -0.81755300 |
| H  | 2.60213700  | -2.69021600 | -0.31585400 |
| H  | 1.44530500  | -3.50276400 | 0.73449300  |
| Ni | 1.91104300  | 0.05543400  | 0.04212700  |
| C  | -0.13751000 | -0.26613800 | 1.89033900  |
| H  | -0.25481100 | -1.33870700 | 1.76287700  |
| C  | 1.20252100  | 0.19561400  | 2.03670800  |
| H  | 1.34176400  | 1.23681100  | 2.32081100  |
| C  | 2.36127900  | -0.66211100 | 2.04037700  |
| H  | 2.20765900  | -1.73484100 | 2.09093600  |

|   |             |             |            |
|---|-------------|-------------|------------|
| H | 3.19132900  | -0.32379300 | 2.65156600 |
| C | 3.88155000  | -0.49309400 | 0.54002400 |
| O | 4.55911600  | -1.49481000 | 0.55850100 |
| O | 4.00228000  | 0.69889900  | 0.19767200 |
| C | -1.23621900 | 0.53882400  | 1.78393000 |
| H | -1.08196800 | 1.61194600  | 1.87754500 |
| C | -2.58641400 | 0.12843600  | 1.44872200 |
| C | -3.58745500 | 1.11319600  | 1.29644800 |
| C | -2.95914700 | -1.21297200 | 1.20478000 |
| C | -4.88407100 | 0.78031800  | 0.92013800 |
| H | -3.32888000 | 2.15334400  | 1.46680800 |
| C | -4.25531100 | -1.54232800 | 0.83149000 |
| H | -2.22323800 | -2.00327000 | 1.29234300 |
| C | -5.23054900 | -0.55126200 | 0.68424200 |
| H | -5.62714500 | 1.56267200  | 0.80774000 |
| H | -4.50800400 | -2.58072400 | 0.64485400 |
| H | -6.23983100 | -0.81357500 | 0.38858600 |

### T-In1

Thermal Correction to Free Energy: 0.337356 Hartree

SCF energy: -1321.044681 Hartree

Gibbs free energy: -1320.707325 Hartree

Coordinates:

|   |            |             |             |
|---|------------|-------------|-------------|
| C | 1.40676400 | 2.75926700  | 0.31568200  |
| C | 2.72124200 | 0.99446700  | -0.49156600 |
| C | 3.45441800 | 1.86077800  | -1.30087600 |
| C | 3.14464600 | 3.21488700  | -1.28370300 |
| C | 2.11589500 | 3.67040200  | -0.46734900 |
| H | 4.24942600 | 1.49353800  | -1.93334800 |
| H | 3.70224400 | 3.90818800  | -1.90144300 |
| H | 1.85675100 | 4.72057700  | -0.43275700 |
| C | 2.96490400 | -0.46533200 | -0.42266100 |
| C | 3.97002200 | -1.11225700 | -1.14033300 |
| C | 4.10550800 | -2.48792800 | -1.01060300 |
| H | 4.63421500 | -0.56000700 | -1.78895500 |
| C | 2.25309100 | -2.48675100 | 0.52132600  |
| C | 3.23828500 | -3.18426600 | -0.17540600 |
| H | 4.87910200 | -3.01255700 | -1.55784000 |
| H | 3.31979300 | -4.25692800 | -0.05827000 |
| N | 1.71999200 | 1.45019400  | 0.29471000  |
| N | 2.13732500 | -1.15129900 | 0.39566100  |
| C | 0.26022800 | 3.18219000  | 1.18706100  |
| H | 0.28028100 | 2.65212700  | 2.14002400  |
| H | 0.27541900 | 4.25762700  | 1.36302100  |

|    |             |             |             |
|----|-------------|-------------|-------------|
| H  | -0.68702400 | 2.92412400  | 0.70457600  |
| C  | 1.26786300  | -3.17565300 | 1.42000400  |
| H  | 1.50309200  | -4.23302500 | 1.53483800  |
| H  | 1.25476000  | -2.70447700 | 2.40609200  |
| H  | 0.25987400  | -3.08586200 | 1.00341700  |
| Ni | 0.60136000  | -0.03525000 | 1.12340800  |
| C  | -0.41588500 | -0.92931400 | -1.43357300 |
| H  | -0.52375200 | -2.00474300 | -1.27979500 |
| C  | -0.86556000 | -0.09423100 | -0.33405100 |
| H  | -0.97553700 | 0.95563000  | -0.62337400 |
| C  | -2.06821000 | -0.57528700 | 0.49028500  |
| C  | -2.04450600 | 0.04371500  | 1.91356800  |
| O  | -3.07731600 | 0.26494100  | 2.53739000  |
| O  | -0.84949600 | 0.25320900  | 2.39258900  |
| C  | 0.19139400  | -0.51784400 | -2.56466200 |
| H  | 0.57497100  | -1.22271100 | -3.29334300 |
| H  | 0.33395600  | 0.53847000  | -2.77426700 |
| H  | -1.92980000 | -1.64969100 | 0.67380500  |
| C  | -3.38473900 | -0.39109000 | -0.23367600 |
| C  | -4.04344500 | -1.47842800 | -0.81537800 |
| C  | -3.93496500 | 0.88650100  | -0.40551200 |
| C  | -5.21861400 | -1.30102900 | -1.54783100 |
| H  | -3.63162200 | -2.47557300 | -0.69488400 |
| C  | -5.10658200 | 1.06956400  | -1.13386500 |
| H  | -3.44248200 | 1.74096300  | 0.04538700  |
| C  | -5.75490600 | -0.02556100 | -1.71055700 |
| H  | -5.71347400 | -2.15957400 | -1.98919500 |
| H  | -5.51822000 | 2.06636100  | -1.25140200 |
| H  | -6.66786400 | 0.11628400  | -2.27808500 |

## T-In2

Thermal Correction to Free Energy: 0.338354 Hartree

SCF energy: -1321.059947 Hartree

Gibbs free energy: -1320.721594 Hartree

Coordinates:

|   |             |             |             |
|---|-------------|-------------|-------------|
| C | 2.56291300  | -1.51457700 | -0.91488200 |
| C | 0.42477400  | -1.74316100 | 0.01867700  |
| C | 0.15281600  | -2.85237400 | -0.78321500 |
| C | 1.12448600  | -3.28694200 | -1.67299700 |
| C | 2.34329200  | -2.61693600 | -1.73843600 |
| H | -0.80141300 | -3.35518100 | -0.72993900 |
| H | 0.93412800  | -4.14079800 | -2.31173100 |
| H | 3.12029100  | -2.94057900 | -2.41850700 |
| C | -0.53297200 | -1.19002300 | 1.00000700  |



|    |             |             |             |
|----|-------------|-------------|-------------|
| C  | -1.78566300 | -1.74661200 | 1.24954600  |
| C  | -2.61119700 | -1.14176700 | 2.18674700  |
| H  | -2.12086500 | -2.62249700 | 0.71457200  |
| C  | -0.91019000 | 0.51497700  | 2.56042700  |
| C  | -2.16975000 | -0.00538200 | 2.85485100  |
| H  | -3.59323500 | -1.55059400 | 2.38944700  |
| H  | -2.79276000 | 0.48458700  | 3.59155700  |
| N  | 1.60922300  | -1.09553400 | -0.06121700 |
| N  | -0.11787300 | -0.07700000 | 1.64752000  |
| C  | 3.85394900  | -0.74931600 | -0.92070100 |
| H  | 4.33444900  | -0.82133700 | 0.05895300  |
| H  | 4.53850800  | -1.12990000 | -1.67792200 |
| H  | 3.66911900  | 0.31161800  | -1.10391800 |
| C  | -0.38449300 | 1.75589500  | 3.22107300  |
| H  | -1.04620100 | 2.09629800  | 4.01667100  |
| H  | 0.60953200  | 1.57346200  | 3.63733600  |
| H  | -0.28366700 | 2.55866400  | 2.48406500  |
| Ni | 1.59207300  | 0.71522300  | 0.85574300  |
| C  | -0.42367600 | 1.49068300  | -0.98020900 |
| H  | -1.09008100 | 2.05919100  | -0.33252800 |
| C  | 0.96711100  | 1.79916800  | -0.85312500 |
| H  | 1.59347000  | 1.36086500  | -1.63440000 |
| C  | 1.41901300  | 3.19070400  | -0.44109100 |
| H  | 0.67261500  | 3.64036500  | 0.22655700  |
| H  | 1.53305900  | 3.87849200  | -1.28685500 |
| C  | 2.73884500  | 3.17476200  | 0.34712900  |
| O  | 3.49843600  | 4.13797600  | 0.33766200  |
| O  | 2.95718200  | 2.08417600  | 1.03690100  |
| C  | -0.94672400 | 0.46846800  | -1.71899000 |
| H  | -0.26274900 | -0.08873600 | -2.35612100 |
| C  | -2.30863300 | -0.03624000 | -1.67616600 |
| C  | -2.64129800 | -1.18708500 | -2.42363000 |
| C  | -3.32987800 | 0.52785200  | -0.88011000 |
| C  | -3.91532100 | -1.74462700 | -2.37664800 |
| H  | -1.87589800 | -1.65095100 | -3.03770700 |
| C  | -4.60245800 | -0.02639400 | -0.83953400 |
| H  | -3.11926000 | 1.39918500  | -0.27152100 |
| C  | -4.90969100 | -1.16864200 | -1.58483000 |
| H  | -4.13265600 | -2.63332600 | -2.95998500 |
| H  | -5.36214200 | 0.43020800  | -0.21366700 |
| H  | -5.90317700 | -1.60042900 | -1.54605400 |

### T-TS3

Thermal Correction to Free Energy: 0.331272 Hartree

SCF energy: -1321.003095 Hartree

Gibbs free energy: -1320.671823 Hartree

Coordinates:

|    |             |             |             |
|----|-------------|-------------|-------------|
| C  | -2.00995100 | -1.80520700 | -1.40108900 |
| C  | -2.34515100 | 0.47686400  | -1.00304800 |
| C  | -3.65638600 | 0.40007900  | -1.47245000 |
| C  | -4.14321100 | -0.82094000 | -1.91635400 |
| C  | -3.30975600 | -1.93441000 | -1.88422300 |
| H  | -4.28729200 | 1.27658100  | -1.49879100 |
| H  | -5.15768900 | -0.90273700 | -2.28687800 |
| H  | -3.65768200 | -2.89957900 | -2.22861500 |
| C  | -1.71971700 | 1.73472800  | -0.55009900 |
| C  | -2.39925300 | 2.95191900  | -0.48751600 |
| C  | -1.71380800 | 4.08515000  | -0.07571500 |
| H  | -3.44490000 | 3.01734700  | -0.75126200 |
| C  | 0.26302500  | 2.73990900  | 0.18570700  |
| C  | -0.36671900 | 3.97952800  | 0.26103600  |
| H  | -2.22160200 | 5.04025500  | -0.01939000 |
| H  | 0.19618900  | 4.84675800  | 0.58096400  |
| N  | -1.54124200 | -0.61611000 | -0.96783400 |
| N  | -0.41019900 | 1.63972800  | -0.21378400 |
| C  | -1.07805300 | -2.97697000 | -1.33206400 |
| H  | -1.47883800 | -3.83686100 | -1.86809000 |
| H  | -0.10428800 | -2.71506900 | -1.75175600 |
| H  | -0.92188400 | -3.26151100 | -0.28886300 |
| C  | 1.70563400  | 2.55959700  | 0.55294500  |
| H  | 1.78695800  | 1.96037400  | 1.46355600  |
| H  | 2.24177400  | 2.02060700  | -0.23132000 |
| H  | 2.19713700  | 3.51660600  | 0.72645800  |
| Ni | 0.28087400  | -0.24502000 | -0.18387200 |
| C  | 0.18517600  | -1.96529100 | 2.11164800  |
| H  | -0.03528300 | -2.90190400 | 1.60436200  |
| C  | 1.20027500  | -1.16381500 | 1.54060200  |
| H  | 1.53422300  | -0.31630900 | 2.13619900  |
| C  | 1.89773800  | -1.47696500 | 0.33594800  |
| H  | 1.64133400  | -2.41860100 | -0.14704700 |
| C  | -2.34753100 | -0.83807300 | 2.16640300  |
| O  | -2.97023200 | -1.79395000 | 1.81801700  |
| O  | -2.20691300 | 0.34613400  | 2.20247200  |
| C  | -0.60661100 | -1.63003100 | 3.20560700  |
| H  | -1.16698500 | -2.41027900 | 3.70704300  |
| H  | -0.33977200 | -0.76656300 | 3.80712300  |
| C  | 3.17694900  | -0.90571400 | -0.08230400 |
| C  | 3.69246200  | -1.22291700 | -1.35963000 |

|   |            |             |             |
|---|------------|-------------|-------------|
| C | 3.94560700 | -0.04086400 | 0.72594700  |
| C | 4.89047900 | -0.68686900 | -1.81201100 |
| H | 3.12525000 | -1.89107100 | -2.00028200 |
| C | 5.14279100 | 0.49993100  | 0.26656100  |
| H | 3.60751600 | 0.20468300  | 1.72538300  |
| C | 5.62538400 | 0.18854700  | -1.00534300 |
| H | 5.25518800 | -0.94860700 | -2.79972300 |
| H | 5.70808600 | 1.16408500  | 0.91201900  |
| H | 6.55912300 | 0.61045800  | -1.35864500 |

#### T-TS4

Thermal Correction to Free Energy: 0.333107 Hartree

SCF energy: -1321.003092 Hartree

Gibbs free energy: -1320.669985 Hartree

Coordinates:

|    |             |             |             |
|----|-------------|-------------|-------------|
| C  | -0.57228600 | 2.46950100  | 1.13973200  |
| C  | -2.06193700 | 1.56386400  | -0.41926500 |
| C  | -2.16390600 | 2.78453300  | -1.08309300 |
| C  | -1.45305600 | 3.87530800  | -0.59885400 |
| C  | -0.64918900 | 3.71698100  | 0.52207200  |
| H  | -2.78423700 | 2.89063200  | -1.96087600 |
| H  | -1.52226700 | 4.83523500  | -1.09583800 |
| H  | -0.07426000 | 4.54445600  | 0.91670700  |
| C  | -2.79690000 | 0.34904900  | -0.84194700 |
| C  | -3.66762000 | 0.33237200  | -1.93076100 |
| C  | -4.33932200 | -0.84352300 | -2.23605400 |
| H  | -3.82483900 | 1.21637800  | -2.53110000 |
| C  | -3.25485400 | -1.89284400 | -0.36280700 |
| C  | -4.13740100 | -1.96469200 | -1.44117400 |
| H  | -5.01915500 | -0.88089300 | -3.07851000 |
| H  | -4.65723500 | -2.89169000 | -1.64507800 |
| N  | -1.28525400 | 1.42212000  | 0.68008100  |
| N  | -2.59083600 | -0.75340600 | -0.08453900 |
| C  | 0.33023100  | 2.22470300  | 2.31056900  |
| H  | 0.74756500  | 3.15397400  | 2.69698100  |
| H  | -0.20427500 | 1.71129500  | 3.11376600  |
| H  | 1.15105200  | 1.57858100  | 1.98782600  |
| C  | -3.01939200 | -3.07716100 | 0.52920300  |
| H  | -2.00870000 | -3.46754400 | 0.39090500  |
| H  | -3.11568200 | -2.78658800 | 1.57682900  |
| H  | -3.72770200 | -3.87640500 | 0.31238900  |
| Ni | -1.19290600 | -0.46549000 | 1.38869200  |
| C  | 1.52761700  | -1.25374500 | 1.03122800  |
| H  | 1.91142900  | -0.61007700 | 1.81840600  |

|   |             |             |             |
|---|-------------|-------------|-------------|
| C | 0.36619800  | -1.98121500 | 1.32776900  |
| H | 0.03872600  | -2.68925100 | 0.56842700  |
| C | -0.36486300 | -1.92193900 | 2.55353900  |
| H | 0.11505400  | -1.44768600 | 3.40936300  |
| H | -1.03311000 | -2.73835900 | 2.80402100  |
| C | 1.15652300  | 0.30876500  | -1.12461300 |
| O | 1.62079200  | 1.35102600  | -0.74629400 |
| O | 0.30193100  | -0.19860000 | -1.80512900 |
| C | 2.18007200  | -1.24467400 | -0.23054400 |
| H | 1.85648400  | -2.02326500 | -0.91733900 |
| C | 3.58763800  | -0.84921400 | -0.39720900 |
| C | 4.32584200  | -1.35213700 | -1.48551100 |
| C | 4.23450300  | 0.06236800  | 0.45871700  |
| C | 5.64691900  | -0.97340300 | -1.70431800 |
| H | 3.85001500  | -2.05240800 | -2.16526500 |
| C | 5.55618400  | 0.43996900  | 0.24045500  |
| H | 3.69840100  | 0.48775500  | 1.29790500  |
| C | 6.27443600  | -0.07336900 | -0.84100400 |
| H | 6.18942700  | -1.38341600 | -2.54973600 |
| H | 6.02900100  | 1.14328000  | 0.91814300  |
| H | 7.30388300  | 0.22271700  | -1.00785200 |

### T-In3

Thermal Correction to Free Energy: 0.338384 Hartree

SCF energy: -1321.021959 Hartree

Gibbs free energy: -1320.683576 Hartree

Coordinates:

|   |             |             |             |
|---|-------------|-------------|-------------|
| C | -2.08495800 | -2.17213100 | -1.11824800 |
| C | -2.42049600 | 0.14266700  | -1.00157800 |
| C | -3.76911700 | -0.00234200 | -1.31718200 |
| C | -4.27309700 | -1.27549800 | -1.54321100 |
| C | -3.42176100 | -2.36973700 | -1.45841600 |
| H | -4.42001200 | 0.85648700  | -1.38021200 |
| H | -5.31903400 | -1.41121700 | -1.78967500 |
| H | -3.78340200 | -3.37239100 | -1.64468100 |
| C | -1.77200100 | 1.46228100  | -0.81150600 |
| C | -2.44280400 | 2.66438300  | -1.01663700 |
| C | -1.74605300 | 3.85659300  | -0.87267500 |
| H | -3.48821500 | 2.67833400  | -1.28591900 |
| C | 0.23062100  | 2.58561500  | -0.36544400 |
| C | -0.39618100 | 3.81820400  | -0.55335000 |
| H | -2.24920900 | 4.80389200  | -1.02350000 |
| H | 0.17989700  | 4.72906200  | -0.45516900 |
| N | -1.60896800 | -0.93187800 | -0.88891600 |

|    |             |             |             |
|----|-------------|-------------|-------------|
| N  | -0.45994700 | 1.43516200  | -0.48112400 |
| C  | -1.12979100 | -3.32278600 | -0.98941100 |
| H  | -1.56029900 | -4.24143700 | -1.38596700 |
| H  | -0.19712200 | -3.11052900 | -1.51834400 |
| H  | -0.88224000 | -3.48737700 | 0.06365700  |
| C  | 1.68908400  | 2.50474800  | -0.02672600 |
| H  | 1.82239500  | 2.42668500  | 1.05541800  |
| H  | 2.15059000  | 1.63021300  | -0.48424100 |
| H  | 2.21640200  | 3.39827400  | -0.36130000 |
| Ni | 0.18890300  | -0.46411000 | -0.10601000 |
| C  | 0.10387200  | -0.98698400 | 2.16020600  |
| H  | -0.20253800 | -2.01380900 | 1.97226800  |
| C  | 1.34352000  | -0.55338900 | 1.70236400  |
| H  | 1.67824300  | 0.42436800  | 2.03624400  |
| C  | 2.10206400  | -1.22660300 | 0.71042700  |
| H  | 1.81712000  | -2.25621100 | 0.48477000  |
| C  | -2.24612300 | -0.16483500 | 2.38261600  |
| O  | -2.80590200 | -1.28184800 | 2.28277400  |
| O  | -2.66637800 | 0.95485000  | 2.00951300  |
| C  | -0.81358400 | -0.19294400 | 3.02603800  |
| H  | -0.91149800 | -0.67405000 | 4.00774700  |
| H  | -0.43911600 | 0.82311000  | 3.16426800  |
| C  | 3.39740500  | -0.81800000 | 0.18294200  |
| C  | 3.92953100  | -1.50069900 | -0.93225600 |
| C  | 4.16034600  | 0.23634500  | 0.72626000  |
| C  | 5.14799700  | -1.13376500 | -1.48938400 |
| H  | 3.36424300  | -2.32045900 | -1.36404700 |
| C  | 5.37855300  | 0.60284800  | 0.16385200  |
| H  | 3.80416600  | 0.76650200  | 1.60098400  |
| C  | 5.88077800  | -0.07380800 | -0.94903000 |
| H  | 5.52895500  | -1.67415000 | -2.34909500 |
| H  | 5.94416600  | 1.41768900  | 0.60247800  |
| H  | 6.83105700  | 0.21410200  | -1.38334100 |

#### T-In4

Thermal Correction to Free Energy: 0.339005 Hartree

SCF energy: -1321.015161 Hartree

Gibbs free energy: -1320.676156 Hartree

Coordinates:

|   |             |            |             |
|---|-------------|------------|-------------|
| C | -1.17686500 | 2.64612700 | 0.86638100  |
| C | -2.26336500 | 1.17488700 | -0.59117400 |
| C | -2.68959800 | 2.22903400 | -1.39374400 |
| C | -2.35456100 | 3.52755800 | -1.03164800 |
| C | -1.58646800 | 3.73928000 | 0.10369400  |

|    |             |             |             |
|----|-------------|-------------|-------------|
| H  | -3.27484600 | 2.05053600  | -2.28321100 |
| H  | -2.68389600 | 4.36316700  | -1.63717000 |
| H  | -1.29314500 | 4.73719400  | 0.40159900  |
| C  | -2.58441800 | -0.24222100 | -0.88422500 |
| C  | -3.26048200 | -0.63503900 | -2.03591100 |
| C  | -3.55899100 | -1.97936400 | -2.21546300 |
| H  | -3.54646000 | 0.08712500  | -2.78571500 |
| C  | -2.52039800 | -2.44446700 | -0.09635700 |
| C  | -3.20072200 | -2.88914200 | -1.23193300 |
| H  | -4.07882300 | -2.30830100 | -3.10695600 |
| H  | -3.44339200 | -3.93926800 | -1.32943400 |
| N  | -1.54371700 | 1.39577500  | 0.53032100  |
| N  | -2.20021900 | -1.14363600 | 0.05025000  |
| C  | -0.27196900 | 2.80859000  | 2.04733500  |
| H  | -0.25548300 | 3.83907000  | 2.40140900  |
| H  | -0.57233100 | 2.15725700  | 2.87112600  |
| H  | 0.73622600  | 2.52707700  | 1.73120300  |
| C  | -2.13856100 | -3.40855800 | 0.98944000  |
| H  | -1.12281900 | -3.78216600 | 0.83506300  |
| H  | -2.17357300 | -2.92450500 | 1.96433900  |
| H  | -2.80923700 | -4.26812700 | 0.98988600  |
| Ni | -1.03200500 | -0.28432300 | 1.52528800  |
| C  | 1.35983400  | -0.47901700 | 1.01355600  |
| H  | 1.59449600  | 0.41250300  | 1.58952400  |
| C  | 0.71472200  | -1.53154800 | 1.63255100  |
| H  | 0.58724700  | -2.43726700 | 1.04373600  |
| C  | 0.02772100  | -1.44523900 | 2.88484600  |
| H  | 0.38177100  | -0.71511400 | 3.61340200  |
| H  | -0.39209800 | -2.34675100 | 3.31225000  |
| C  | 1.11361700  | 0.70494400  | -1.15783700 |
| O  | 1.36745900  | 1.85687100  | -0.73463800 |
| O  | 0.32396200  | 0.36363400  | -2.06561600 |
| C  | 1.83752400  | -0.48777600 | -0.40635100 |
| H  | 1.50579100  | -1.41103000 | -0.88511700 |
| C  | 3.35197600  | -0.41476900 | -0.49748400 |
| C  | 4.06916700  | 0.69705800  | -0.03203100 |
| C  | 4.06927500  | -1.48451400 | -1.04577900 |
| C  | 5.45891700  | 0.73414700  | -0.11688300 |
| H  | 3.51742500  | 1.53869000  | 0.36466300  |
| C  | 5.46153900  | -1.44852600 | -1.13372300 |
| H  | 3.53159000  | -2.35528400 | -1.40763700 |
| C  | 6.16335000  | -0.33835300 | -0.66749700 |
| H  | 5.99553400  | 1.60462300  | 0.24590000  |
| H  | 5.99553000  | -2.28834300 | -1.56542800 |

|   |            |             |             |
|---|------------|-------------|-------------|
| H | 7.24537600 | -0.30759900 | -0.73204400 |
|---|------------|-------------|-------------|

### T-TS-iso3

Thermal Correction to Free Energy: 0.339133 Hartree

SCF energy: -1321.020873 Hartree

Gibbs free energy: -1320.681740 Hartree

Coordinates:

|    |             |             |             |
|----|-------------|-------------|-------------|
| C  | -2.44375400 | -1.68376400 | -1.32821400 |
| C  | -2.19833000 | 0.64601500  | -1.32023400 |
| C  | -3.32349400 | 0.80368500  | -2.12582800 |
| C  | -4.01347700 | -0.32708500 | -2.54492800 |
| C  | -3.57468800 | -1.57936100 | -2.13903400 |
| H  | -3.66776000 | 1.78437000  | -2.41802200 |
| H  | -4.88996800 | -0.22791700 | -3.17333600 |
| H  | -4.10022800 | -2.47668600 | -2.43768600 |
| C  | -1.42222600 | 1.79291900  | -0.78695200 |
| C  | -1.71415500 | 3.11214300  | -1.12611600 |
| C  | -0.97541200 | 4.13621700  | -0.54844300 |
| H  | -2.50274400 | 3.34463100  | -1.82600300 |
| C  | 0.28344100  | 2.47840900  | 0.65600100  |
| C  | 0.02451300  | 3.81728800  | 0.35794000  |
| H  | -1.18494500 | 5.16889700  | -0.79866800 |
| H  | 0.60802500  | 4.59150100  | 0.83807400  |
| N  | -1.76810600 | -0.58035700 | -0.94608200 |
| N  | -0.42289700 | 1.48700800  | 0.07646400  |
| C  | -1.96044400 | -3.00712500 | -0.81861900 |
| H  | -2.54849600 | -3.82653000 | -1.23067700 |
| H  | -0.91232700 | -3.16562400 | -1.08637800 |
| H  | -2.04772200 | -3.01198700 | 0.27272100  |
| C  | 1.35060900  | 2.09733200  | 1.63452200  |
| H  | 0.92949800  | 1.45779200  | 2.41259100  |
| H  | 2.14231900  | 1.54300500  | 1.12733100  |
| H  | 1.79012200  | 2.97783100  | 2.10142600  |
| Ni | -0.12060400 | -0.54052100 | 0.20659800  |
| C  | 0.24286000  | -1.89098700 | 1.90570200  |
| H  | -0.13591900 | -2.76038600 | 1.37148400  |
| C  | 1.44323200  | -1.32017200 | 1.47458100  |
| H  | 1.89717400  | -0.57882300 | 2.12225100  |
| C  | 2.03322900  | -1.56646500 | 0.21528700  |
| H  | 1.63121700  | -2.38177900 | -0.38484600 |
| C  | -1.93882400 | -1.15582500 | 2.86648000  |
| O  | -2.24948100 | 0.03269600  | 3.10931400  |
| O  | -2.64876400 | -2.05975000 | 2.36114800  |
| C  | -0.45698300 | -1.56623800 | 3.18347900  |

|   |             |             |             |
|---|-------------|-------------|-------------|
| H | -0.49056100 | -2.45393800 | 3.82695900  |
| H | 0.05174100  | -0.76103400 | 3.71647200  |
| C | 3.22106800  | -0.92662500 | -0.31465000 |
| C | 3.53824900  | -1.09225400 | -1.68166400 |
| C | 4.09336400  | -0.13676000 | 0.46717600  |
| C | 4.65123900  | -0.48000800 | -2.24260200 |
| H | 2.88732900  | -1.70042000 | -2.30122600 |
| C | 5.20579100  | 0.47438800  | -0.09935500 |
| H | 3.91508400  | -0.02009600 | 1.52931400  |
| C | 5.49135500  | 0.31349300  | -1.45703800 |
| H | 4.86638100  | -0.61969100 | -3.29620300 |
| H | 5.86067200  | 1.07282700  | 0.52426900  |
| H | 6.36020300  | 0.79151000  | -1.89403900 |

#### T-TS-iso4

Thermal Correction to Free Energy: 0.337614 Hartree

SCF energy: -1321.011471 Hartree

Gibbs free energy: -1320.673857 Hartree

Coordinates:

|   |             |             |             |
|---|-------------|-------------|-------------|
| C | -1.20090000 | 2.67059800  | 0.60260700  |
| C | -2.85164300 | 1.23177500  | -0.23427700 |
| C | -3.57771400 | 2.30424700  | -0.74633100 |
| C | -3.09283200 | 3.59308100  | -0.55985800 |
| C | -1.89485500 | 3.77888500  | 0.11550400  |
| H | -4.49639400 | 2.14729300  | -1.29153800 |
| H | -3.64202200 | 4.44167500  | -0.94882900 |
| H | -1.48722700 | 4.77021600  | 0.26262500  |
| C | -3.26855000 | -0.18178600 | -0.41253300 |
| C | -4.49215600 | -0.52748100 | -0.98154300 |
| C | -4.79883600 | -1.87042600 | -1.15560400 |
| H | -5.19904000 | 0.23104200  | -1.28274500 |
| C | -2.66791600 | -2.42827100 | -0.18817600 |
| C | -3.87489800 | -2.82789200 | -0.76541400 |
| H | -5.74474200 | -2.16245700 | -1.59476900 |
| H | -4.07618700 | -3.88232700 | -0.90020800 |
| N | -1.69271100 | 1.42584000  | 0.43402600  |
| N | -2.38339000 | -1.12323300 | -0.00336000 |
| C | 0.12645900  | 2.80641600  | 1.28420600  |
| H | 0.39985700  | 3.85365600  | 1.40916200  |
| H | 0.11001500  | 2.33285700  | 2.26996900  |
| H | 0.88285900  | 2.30989200  | 0.66807100  |
| C | -1.64385200 | -3.44162000 | 0.22418400  |
| H | -0.72476700 | -3.29096400 | -0.34608200 |
| H | -1.40621000 | -3.33486500 | 1.28340200  |



|    |             |             |             |
|----|-------------|-------------|-------------|
| H  | -2.00185100 | -4.45462400 | 0.04571400  |
| Ni | -0.82089800 | -0.28326000 | 1.07869600  |
| C  | 1.68785800  | -0.62692300 | 0.93189300  |
| H  | 1.84941100  | 0.32710800  | 1.42786700  |
| C  | 0.87166000  | -1.56308700 | 1.54339500  |
| H  | 0.79772200  | -2.53283100 | 1.06207500  |
| C  | 0.02754300  | -1.30427600 | 2.66493500  |
| H  | 0.29387700  | -0.49495600 | 3.34459700  |
| H  | -0.51319800 | -2.12537500 | 3.11956300  |
| C  | 1.49347100  | 0.06107300  | -1.43311300 |
| O  | 1.61579300  | 1.30265700  | -1.34420700 |
| O  | 0.74708600  | -0.60435100 | -2.18186400 |
| C  | 2.34654700  | -0.80945100 | -0.39594300 |
| H  | 2.23817900  | -1.84840200 | -0.71078500 |
| C  | 3.81697700  | -0.44470800 | -0.37986800 |
| C  | 4.25874900  | 0.83043200  | 0.00142000  |
| C  | 4.77525800  | -1.39401700 | -0.75273700 |
| C  | 5.61609800  | 1.14198900  | 0.00758800  |
| H  | 3.52603600  | 1.58163100  | 0.26355600  |
| C  | 6.13570600  | -1.08343700 | -0.75054000 |
| H  | 4.45313600  | -2.38768600 | -1.04774900 |
| C  | 6.56255800  | 0.18698400  | -0.36842100 |
| H  | 5.93728600  | 2.13486900  | 0.30448700  |
| H  | 6.85976600  | -1.83545800 | -1.04518300 |
| H  | 7.61900700  | 0.43129200  | -0.36279900 |

### MECP-1

SCF energy: -1132.358236 Hartree

Coordinates:

|   |            |             |             |
|---|------------|-------------|-------------|
| C | 2.25124400 | -2.05005400 | -0.76494400 |
| C | 2.63031400 | 0.28645200  | -0.48039800 |
| C | 3.95477500 | 0.11288700  | -0.98458300 |
| C | 4.39587200 | -1.12210200 | -1.36913200 |
| C | 3.52144800 | -2.24064900 | -1.26850300 |
| H | 4.61595400 | 0.96588700  | -1.06071000 |
| H | 5.40366100 | -1.25045500 | -1.74935400 |
| H | 3.83850700 | -3.22740700 | -1.57941600 |
| C | 2.09685600 | 1.53963000  | -0.08366000 |
| C | 2.81285500 | 2.77093200  | -0.18087200 |
| C | 2.23533100 | 3.94481500  | 0.21412500  |
| H | 3.81989600 | 2.77540000  | -0.57623000 |
| C | 0.23533200 | 2.73206400  | 0.80986700  |
| C | 0.90709300 | 3.93384200  | 0.72552900  |
| H | 2.78220300 | 4.87834000  | 0.13690600  |

|    |             |             |             |
|----|-------------|-------------|-------------|
| H  | 0.42395800  | 4.84754200  | 1.04583900  |
| N  | 1.79612000  | -0.83375800 | -0.36297100 |
| N  | 0.79020500  | 1.55203900  | 0.42500400  |
| C  | 1.29632700  | -3.20438100 | -0.64120600 |
| H  | 1.00794500  | -3.34854200 | 0.40156200  |
| H  | 0.38176200  | -3.00630800 | -1.20725900 |
| H  | 1.74226300  | -4.12762800 | -1.01242400 |
| C  | -1.16967300 | 2.67766500  | 1.34029100  |
| H  | -1.84346200 | 2.26597400  | 0.58640900  |
| H  | -1.22602000 | 2.02501000  | 2.21572700  |
| H  | -1.52426700 | 3.66918400  | 1.62306400  |
| Ni | 0.00231900  | -0.32813100 | 0.48188500  |
| C  | -1.31712500 | -1.85580400 | 1.09726200  |
| H  | -1.43102500 | -2.59019300 | 0.30610600  |
| C  | -1.99522400 | -0.63092900 | 0.99566300  |
| H  | -2.17042000 | -0.07923900 | 1.91606000  |
| C  | -0.82263300 | -2.35971500 | 2.37820300  |
| H  | -0.70838700 | -1.61832100 | 3.16713200  |
| C  | -0.51782100 | -3.63818000 | 2.63304200  |
| H  | -0.62507800 | -4.40814700 | 1.87614900  |
| H  | -0.15863900 | -3.94861500 | 3.60684900  |
| C  | -2.88115400 | -0.26517500 | -0.12865700 |
| C  | -2.74118200 | -0.81460200 | -1.41577300 |
| C  | -3.91425900 | 0.66188400  | 0.08474100  |
| C  | -3.60132400 | -0.44789000 | -2.44581800 |
| H  | -1.94381600 | -1.52089900 | -1.61866200 |
| C  | -4.77906200 | 1.02317200  | -0.94464300 |
| H  | -4.04227000 | 1.09611000  | 1.07037700  |
| C  | -4.62639000 | 0.47143500  | -2.21588300 |
| H  | -3.47058400 | -0.87909700 | -3.43191600 |
| H  | -5.57320200 | 1.73598900  | -0.75244200 |
| H  | -5.29775600 | 0.75334800  | -3.01870500 |

## MECP-2

SCF energy: -1132.362123 Hartree

Coordinates:

|   |            |            |             |
|---|------------|------------|-------------|
| C | 0.71577800 | 2.61824200 | 0.35309200  |
| C | 2.52829800 | 1.34567400 | -0.46505300 |
| C | 3.13742000 | 2.51746100 | -0.96026500 |
| C | 2.51962700 | 3.73650000 | -0.79513100 |
| C | 1.27526600 | 3.78589400 | -0.13823400 |
| H | 4.08546100 | 2.46013700 | -1.47697700 |
| H | 2.97704200 | 4.64307000 | -1.17407300 |
| H | 0.75123100 | 4.72435900 | -0.01151100 |

|    |             |             |             |
|----|-------------|-------------|-------------|
| C  | 3.08328700  | 0.02471600  | -0.65307300 |
| C  | 4.28530200  | -0.22781500 | -1.34606000 |
| C  | 4.71280800  | -1.52340800 | -1.52856200 |
| H  | 4.86704700  | 0.59285400  | -1.74217200 |
| C  | 2.77629000  | -2.29394100 | -0.31665700 |
| C  | 3.93996800  | -2.58066200 | -1.01053900 |
| H  | 5.63033500  | -1.72815000 | -2.06726000 |
| H  | 4.24757700  | -3.60983500 | -1.14247600 |
| N  | 1.32674100  | 1.41048900  | 0.21764600  |
| N  | 2.34638100  | -1.01884600 | -0.13422700 |
| C  | -0.60694400 | 2.64271600  | 1.05987600  |
| H  | -1.27809100 | 1.89643900  | 0.63257400  |
| H  | -0.47983000 | 2.39733900  | 2.11718300  |
| H  | -1.07551500 | 3.62443900  | 0.98968500  |
| C  | 1.94333900  | -3.39105700 | 0.28305400  |
| H  | 2.00504900  | -3.35456800 | 1.37385000  |
| H  | 0.89079400  | -3.27028900 | 0.01404600  |
| H  | 2.28371000  | -4.37151900 | -0.05052600 |
| Ni | 0.74071200  | -0.40895700 | 0.86477800  |
| C  | -1.97476500 | -0.83983400 | 1.20541100  |
| H  | -1.86261400 | -1.75738500 | 0.63162300  |
| C  | -3.05427500 | -0.04719500 | 1.00554400  |
| H  | -3.15423000 | 0.83377600  | 1.63565300  |
| C  | -0.90388400 | -0.53507500 | 2.13164300  |
| H  | -1.01630000 | 0.36940600  | 2.72159200  |
| C  | 0.10876300  | -1.44483400 | 2.47815700  |
| H  | 0.02201400  | -2.48630200 | 2.17904500  |
| H  | 0.71862800  | -1.26575900 | 3.35758500  |
| C  | -4.11016000 | -0.22329300 | 0.01410000  |
| C  | -5.23965400 | 0.61701700  | 0.06196100  |
| C  | -4.04658600 | -1.17544900 | -1.02408400 |
| C  | -6.25984200 | 0.51187700  | -0.87853900 |
| H  | -5.31095900 | 1.35953000  | 0.85074000  |
| C  | -5.06591300 | -1.27723500 | -1.96334100 |
| H  | -3.18480900 | -1.82782000 | -1.10696500 |
| C  | -6.17961600 | -0.43528300 | -1.89923600 |
| H  | -7.11694800 | 1.17322000  | -0.81670700 |
| H  | -4.98904300 | -2.00986900 | -2.75926900 |
| H  | -6.96937600 | -0.51386600 | -2.63772700 |

### T-TS5

Thermal Correction to Free Energy: 0.346273 Hartree

SCF energy: -1509.679654 Hartree

Gibbs free energy: -1509.333381 Hartree

## Coordinates:

|    |             |             |             |
|----|-------------|-------------|-------------|
| C  | -1.34976100 | 2.77508600  | 0.62459200  |
| C  | -2.78090400 | 0.92564000  | 0.80012300  |
| C  | -3.40806300 | 1.46675000  | 1.91776900  |
| C  | -2.98380900 | 2.70425600  | 2.38968700  |
| C  | -1.95368500 | 3.36557400  | 1.73794300  |
| H  | -4.20947700 | 0.94153900  | 2.41606700  |
| H  | -3.45808100 | 3.14641800  | 3.25712100  |
| H  | -1.60868800 | 4.33247500  | 2.08019100  |
| C  | -3.16017200 | -0.37943200 | 0.20607000  |
| C  | -4.20144800 | -1.16965400 | 0.68604600  |
| C  | -4.47181200 | -2.37635400 | 0.05197300  |
| H  | -4.79294000 | -0.85740800 | 1.53392500  |
| C  | -2.67668400 | -1.93247600 | -1.48309700 |
| C  | -3.70691400 | -2.76237200 | -1.04152300 |
| H  | -5.27581200 | -3.00847200 | 0.40814900  |
| H  | -3.90028200 | -3.69507600 | -1.55445000 |
| N  | -1.76907100 | 1.57686400  | 0.17923800  |
| N  | -2.42226900 | -0.76902300 | -0.85613800 |
| C  | -0.20701100 | 3.44123300  | -0.08531300 |
| H  | -0.18556000 | 3.17501600  | -1.14141400 |
| H  | -0.26723000 | 4.52460800  | 0.02074000  |
| H  | 0.74235600  | 3.11628700  | 0.35203100  |
| C  | -1.80407200 | -2.29051400 | -2.65076700 |
| H  | -2.16219500 | -3.18749400 | -3.15384800 |
| H  | -1.77301000 | -1.46897100 | -3.37137000 |
| H  | -0.77858800 | -2.46860600 | -2.31410200 |
| Ni | -0.86704200 | 0.46282600  | -1.27723500 |
| C  | 0.32362100  | -1.26892200 | 0.50360600  |
| H  | 0.41699500  | -2.19797100 | -0.05839800 |
| C  | 0.83150800  | -0.11266600 | -0.09989500 |
| H  | 0.91553000  | 0.75484400  | 0.55427000  |
| C  | 1.90930500  | -0.18957200 | -1.17827100 |
| C  | 1.69797700  | 0.88643500  | -2.27314100 |
| O  | 2.63258900  | 1.34024800  | -2.91835200 |
| O  | 0.44888700  | 1.21406100  | -2.47630200 |
| H  | 1.77507700  | -1.13790000 | -1.71382200 |
| C  | 3.29167300  | -0.18611600 | -0.55778600 |
| C  | 3.98139400  | -1.38543700 | -0.35797300 |
| C  | 3.86287500  | 1.00033900  | -0.08164800 |
| C  | 5.21209100  | -1.40342200 | 0.29890500  |
| H  | 3.54885900  | -2.31499000 | -0.71401300 |
| C  | 5.09046400  | 0.98707300  | 0.57511600  |
| H  | 3.34643800  | 1.94065300  | -0.23678000 |

|   |             |             |            |
|---|-------------|-------------|------------|
| C | 5.77080600  | -0.21655300 | 0.76892500 |
| H | 5.73200700  | -2.34418000 | 0.44325300 |
| H | 5.51838800  | 1.91617600  | 0.93562400 |
| H | 6.72641700  | -0.22739100 | 1.28092600 |
| C | 1.42489500  | -1.78807800 | 2.82344800 |
| O | 1.96297900  | -0.74177800 | 3.06605700 |
| O | 1.46806700  | -2.98005600 | 2.96856600 |
| C | -0.25599900 | -1.35312000 | 1.77346400 |
| H | -0.88068700 | -2.21077700 | 1.99540000 |
| H | -0.53078800 | -0.42876900 | 2.27210500 |

### T-TS6

Thermal Correction to Free Energy: 0.348022 Hartree

SCF energy: -1509.692765 Hartree

Gibbs free energy: -1509.344743 Hartree

Coordinates:

|    |             |             |             |
|----|-------------|-------------|-------------|
| C  | 0.53330000  | 3.03045200  | 0.84315400  |
| C  | -0.82184900 | 1.90724600  | -0.70611400 |
| C  | -1.85880000 | 2.81619900  | -0.51240600 |
| C  | -1.68235600 | 3.85069200  | 0.39625900  |
| C  | -0.48019200 | 3.95787200  | 1.08293900  |
| H  | -2.78919000 | 2.72022000  | -1.05110700 |
| H  | -2.47703900 | 4.56639100  | 0.56654700  |
| H  | -0.31626800 | 4.75495500  | 1.79571200  |
| C  | -0.91974500 | 0.75741000  | -1.63684900 |
| C  | -2.08682500 | 0.43559500  | -2.31990300 |
| C  | -2.08386900 | -0.66313200 | -3.16962000 |
| H  | -2.99073500 | 1.00685000  | -2.17702900 |
| C  | 0.22249800  | -1.04658500 | -2.60392000 |
| C  | -0.92165300 | -1.40406700 | -3.32036600 |
| H  | -2.98468000 | -0.93911000 | -3.70319800 |
| H  | -0.89010900 | -2.26257800 | -3.97815600 |
| N  | 0.34730000  | 2.02718000  | -0.03800800 |
| N  | 0.20483200  | 0.01630500  | -1.77798900 |
| C  | 1.85652700  | 3.11049400  | 1.54564600  |
| H  | 2.67494900  | 3.15971500  | 0.82180600  |
| H  | 1.90781000  | 3.98736100  | 2.18931500  |
| H  | 2.01585000  | 2.22041600  | 2.15892400  |
| C  | 1.48913300  | -1.84423300 | -2.70546800 |
| H  | 1.49681100  | -2.44665500 | -3.61327000 |
| H  | 2.36385700  | -1.19454600 | -2.68732200 |
| H  | 1.57049400  | -2.52403900 | -1.85180200 |
| Ni | 1.72496800  | 0.61360100  | -0.54315400 |
| C  | 0.58483600  | -1.22284500 | 1.00276000  |

|   |             |             |             |
|---|-------------|-------------|-------------|
| H | 0.45620400  | -2.06104200 | 0.32147700  |
| C | 1.87995100  | -0.76546400 | 1.17593400  |
| H | 2.03899200  | -0.02931000 | 1.96318000  |
| C | 3.09083800  | -1.58774800 | 0.78823100  |
| C | 4.05596200  | -0.89031800 | -0.18231700 |
| O | 5.22671200  | -1.23524000 | -0.26377400 |
| O | 3.52055200  | 0.04449100  | -0.92628000 |
| H | 2.77586200  | -2.50999400 | 0.28714500  |
| C | -0.46700900 | -1.90505800 | 3.25573100  |
| O | -1.17950200 | -2.86659100 | 3.11554400  |
| O | 0.29440400  | -1.36949900 | 4.02471300  |
| C | -0.58104500 | -0.73504600 | 1.65159800  |
| H | -0.44791400 | 0.21479500  | 2.16288100  |
| H | 3.65961400  | -1.89727400 | 1.66911700  |
| C | -1.91387200 | -0.90106300 | 1.03686100  |
| C | -2.88547800 | 0.09797100  | 1.21014900  |
| C | -2.26957300 | -2.03618500 | 0.28959200  |
| C | -4.14568000 | -0.00940200 | 0.62848900  |
| H | -2.63628600 | 0.98047000  | 1.78960000  |
| C | -3.52785300 | -2.14499400 | -0.29257300 |
| H | -1.55800100 | -2.84268000 | 0.16259400  |
| C | -4.47321500 | -1.13014000 | -0.13424800 |
| H | -4.86922100 | 0.78698800  | 0.76544600  |
| H | -3.77228800 | -3.02587900 | -0.87627600 |
| H | -5.45070600 | -1.21431500 | -0.59521300 |

### T-In5

Thermal Correction to Free Energy: 0.349467 Hartree

SCF energy: -1509.690834 Hartree

Gibbs free energy: -1509.341367 Hartree

Coordinates:

|   |             |             |             |
|---|-------------|-------------|-------------|
| C | -1.15706700 | 2.77749800  | 0.88132200  |
| C | -2.77363200 | 1.08601000  | 0.68609800  |
| C | -3.52046000 | 1.62460200  | 1.72691500  |
| C | -3.05918700 | 2.77521200  | 2.35776700  |
| C | -1.87784600 | 3.35818000  | 1.92888900  |
| H | -4.44417900 | 1.16489100  | 2.04463200  |
| H | -3.62442200 | 3.21284300  | 3.17108600  |
| H | -1.50207400 | 4.26046700  | 2.39266400  |
| C | -3.18960600 | -0.12421100 | -0.06340700 |
| C | -4.36470200 | -0.82151300 | 0.19868900  |
| C | -4.65605100 | -1.95112100 | -0.55701800 |
| H | -5.04201500 | -0.50102900 | 0.97601400  |
| C | -2.61724100 | -1.61646700 | -1.78561500 |

|    |             |             |             |
|----|-------------|-------------|-------------|
| C  | -3.77985800 | -2.35209800 | -1.55625400 |
| H  | -5.56232400 | -2.51199400 | -0.36556900 |
| H  | -3.98529600 | -3.22592400 | -2.15973600 |
| N  | -1.60825000 | 1.65462700  | 0.28973900  |
| N  | -2.34347600 | -0.52956700 | -1.03777500 |
| C  | 0.13208300  | 3.38277500  | 0.40899800  |
| H  | 0.27761400  | 3.22826300  | -0.65866700 |
| H  | 0.15402700  | 4.44951300  | 0.63127000  |
| H  | 0.97741600  | 2.92087400  | 0.92801300  |
| C  | -1.63541800 | -1.98951300 | -2.85656000 |
| H  | -1.95542500 | -2.88135200 | -3.39237700 |
| H  | -1.52679700 | -1.16846100 | -3.57062200 |
| H  | -0.65016100 | -2.17901000 | -2.42266400 |
| Ni | -0.66879200 | 0.58932200  | -1.17200400 |
| C  | 0.33394000  | -1.21770200 | 0.33228100  |
| H  | 0.36485900  | -2.05782600 | -0.35518700 |
| C  | 1.16070600  | -0.16743400 | 0.10814700  |
| H  | 1.21111800  | 0.61986400  | 0.85676600  |
| C  | 2.22518600  | -0.11871300 | -0.96885000 |
| C  | 2.02403300  | 1.08562500  | -1.92260300 |
| O  | 2.95808200  | 1.60930500  | -2.50408200 |
| O  | 0.77600800  | 1.44317000  | -2.08471500 |
| H  | 2.09506800  | -0.99595300 | -1.61261200 |
| C  | 3.59640800  | -0.18802800 | -0.32350700 |
| C  | 4.24713500  | -1.41849200 | -0.19596200 |
| C  | 4.19487100  | 0.95168400  | 0.22549700  |
| C  | 5.47665700  | -1.50988000 | 0.45523000  |
| H  | 3.78505700  | -2.31175700 | -0.60317400 |
| C  | 5.42158200  | 0.86285900  | 0.87891200  |
| H  | 3.70723400  | 1.91400200  | 0.12612300  |
| C  | 6.06759000  | -0.36851700 | 0.99501200  |
| H  | 5.97051800  | -2.47127200 | 0.54113400  |
| H  | 5.87506300  | 1.75552700  | 1.29511700  |
| H  | 7.02351800  | -0.43684000 | 1.50174600  |
| C  | 0.08744400  | -2.65516300 | 2.38297700  |
| O  | -0.02654100 | -2.55412700 | 3.61978600  |
| O  | 0.55407500  | -3.59798000 | 1.70401700  |
| C  | -0.47713100 | -1.42599900 | 1.55632200  |
| H  | -1.50371900 | -1.70373000 | 1.30008400  |
| H  | -0.50641600 | -0.53804100 | 2.18859300  |

### T-In6

Thermal Correction to Free Energy: 0.350542 Hartree

SCF energy: -1509.697712 Hartree

Gibbs free energy: -1509.347171 Hartree

Coordinates:

|    |             |             |             |
|----|-------------|-------------|-------------|
| C  | 0.25925600  | 0.33090400  | 3.01534200  |
| C  | 1.27596200  | -0.97288800 | 1.35009900  |
| C  | 2.48479800  | -0.97311000 | 2.03928600  |
| C  | 2.57392400  | -0.28208300 | 3.23937000  |
| C  | 1.45698400  | 0.38163900  | 3.72749000  |
| H  | 3.34845800  | -1.48623500 | 1.64540700  |
| H  | 3.50870900  | -0.25849000 | 3.78534600  |
| H  | 1.49900400  | 0.93074500  | 4.65842200  |
| C  | 1.09948800  | -1.63856200 | 0.03806800  |
| C  | 2.13943000  | -2.27811900 | -0.62445000 |
| C  | 1.88785600  | -2.87052600 | -1.85596300 |
| H  | 3.13238400  | -2.30782000 | -0.20393600 |
| C  | -0.40388400 | -2.15647200 | -1.68746200 |
| C  | 0.61143400  | -2.81065500 | -2.38970700 |
| H  | 2.68579500  | -3.36897500 | -2.39185700 |
| H  | 0.38590000  | -3.26514900 | -3.34504000 |
| N  | 0.18748400  | -0.33894100 | 1.84566000  |
| N  | -0.14528500 | -1.58277700 | -0.49648600 |
| C  | -0.97538900 | 1.01791900  | 3.51874400  |
| H  | -1.82240100 | 0.32795100  | 3.53953900  |
| H  | -0.82207600 | 1.41120400  | 4.52230900  |
| H  | -1.23877400 | 1.85195700  | 2.86296500  |
| C  | -1.79287000 | -2.06546900 | -2.24583300 |
| H  | -1.94057700 | -2.79805000 | -3.03788100 |
| H  | -2.53534700 | -2.21874900 | -1.46264200 |
| H  | -1.96162200 | -1.07173800 | -2.67137000 |
| Ni | -1.47652400 | -0.63268900 | 0.72055100  |
| C  | -1.33206500 | 1.43882700  | -0.77356400 |
| H  | -1.37221700 | 1.00558800  | -1.76719800 |
| C  | -2.46433200 | 1.39301600  | -0.02912000 |
| H  | -2.48426300 | 1.90687600  | 0.93042600  |
| C  | -3.78542500 | 0.86802400  | -0.52955100 |
| C  | -4.25270100 | -0.43217800 | 0.14375900  |
| O  | -5.43627500 | -0.71766000 | 0.20957400  |
| O  | -3.29134700 | -1.20816700 | 0.58010400  |
| H  | -3.72503300 | 0.65316500  | -1.60148900 |
| C  | -0.24927000 | 3.63473600  | -1.23081900 |
| O  | 0.10386200  | 4.62435500  | -0.56919200 |
| O  | -0.66813600 | 3.54878600  | -2.40248000 |
| C  | -0.11180400 | 2.22374200  | -0.44792200 |
| H  | -0.07931000 | 2.45896800  | 0.61598600  |
| H  | -4.56673600 | 1.61871800  | -0.39657700 |



|   |            |            |             |
|---|------------|------------|-------------|
| C | 1.20074600 | 1.61716800 | -0.88201300 |
| C | 2.32216600 | 1.72549800 | -0.05330000 |
| C | 1.36069600 | 1.02194800 | -2.14184700 |
| C | 3.56393300 | 1.23725100 | -0.45718800 |
| H | 2.21688200 | 2.18567100 | 0.92349300  |
| C | 2.59760600 | 0.52980600 | -2.54514900 |
| H | 0.51739300 | 0.95817900 | -2.81743900 |
| C | 3.70683300 | 0.63290700 | -1.70429800 |
| H | 4.41557400 | 1.32141200 | 0.20859800  |
| H | 2.69515800 | 0.05899100 | -3.51696600 |
| H | 4.66849000 | 0.24297700 | -2.01764700 |

**[Mn(DMA)<sub>5</sub>]<sup>2+</sup> (sextet)**

Thermal Correction to Free Energy: 0.578304 Hartree

SCF energy: -1543.937903 Hartree

Gibbs free energy: -1543.359600 Hartree

Coordinates:

|    |             |             |             |
|----|-------------|-------------|-------------|
| Mn | -0.49394700 | 0.01831400  | -0.48617300 |
| N  | 2.96003300  | -1.18858100 | -2.29925900 |
| C  | 4.36216600  | -0.91164400 | -2.61154800 |
| H  | 4.64709800  | -1.46719000 | -3.50791300 |
| H  | 4.52721400  | 0.14495500  | -2.79408200 |
| H  | 4.99699300  | -1.23241100 | -1.78223400 |
| C  | 2.60517500  | -2.60589200 | -2.18419300 |
| H  | 1.73000900  | -2.71402800 | -1.54961500 |
| H  | 2.39015400  | -3.03134100 | -3.16802900 |
| H  | 3.44668900  | -3.13958600 | -1.74215800 |
| C  | 2.00903200  | -0.25784300 | -2.19465200 |
| C  | 2.37184900  | 1.20619200  | -2.24134300 |
| H  | 3.16758800  | 1.44646900  | -1.53457400 |
| H  | 2.70653700  | 1.48916900  | -3.24223100 |
| H  | 1.48291300  | 1.78239100  | -1.99321500 |
| O  | 0.80457400  | -0.60051000 | -2.05146200 |
| N  | -2.48767600 | -3.07552100 | -1.01215300 |
| C  | -3.28065300 | -4.19534900 | -0.49997100 |
| H  | -2.60560700 | -4.91211300 | -0.03066100 |
| H  | -3.99619600 | -3.86607700 | 0.24744000  |
| H  | -3.81041600 | -4.69452000 | -1.31594600 |
| C  | -1.23879900 | -3.45236200 | -1.67986200 |
| H  | -0.76737600 | -2.57703900 | -2.11590500 |
| H  | -0.55741400 | -3.91016300 | -0.95845700 |
| H  | -1.45689400 | -4.18178900 | -2.46343300 |
| C  | -2.89022500 | -1.80053600 | -0.97539000 |
| C  | -4.22302900 | -1.45480300 | -0.36260000 |

|   |             |             |             |
|---|-------------|-------------|-------------|
| H | -5.03237600 | -2.07850400 | -0.74375800 |
| H | -4.17014900 | -1.57662500 | 0.72223700  |
| H | -4.43233200 | -0.41111400 | -0.58298400 |
| O | -2.16811600 | -0.87561200 | -1.43298900 |
| N | -1.59809900 | 4.16473200  | -0.93536100 |
| C | -2.64270700 | 5.18609900  | -0.84095300 |
| H | -2.71687600 | 5.70316600  | -1.79967400 |
| H | -3.60900100 | 4.74710000  | -0.61532100 |
| H | -2.38709300 | 5.91379500  | -0.06691700 |
| C | -0.32503300 | 4.61623800  | -1.50674900 |
| H | 0.48430300  | 3.98164200  | -1.15690800 |
| H | -0.36350300 | 4.58298800  | -2.59886000 |
| H | -0.14746900 | 5.64340400  | -1.18826700 |
| C | -1.76373200 | 2.88448300  | -0.60373400 |
| C | -3.04999400 | 2.42093100  | 0.03269000  |
| H | -3.37752700 | 3.09178600  | 0.82722500  |
| H | -3.84215400 | 2.36538700  | -0.71850500 |
| H | -2.89074900 | 1.42837400  | 0.44856000  |
| O | -0.83121200 | 2.06136900  | -0.81939800 |
| N | -0.26229400 | -1.58387800 | 2.84713800  |
| C | 0.40149400  | -1.73211900 | 4.14257100  |
| H | 1.48001400  | -1.79827700 | 3.98197000  |
| H | 0.20239900  | -0.88436300 | 4.78968900  |
| H | 0.06143600  | -2.64575500 | 4.63535600  |
| C | 0.09107100  | -2.58548200 | 1.83714200  |
| H | -0.73853400 | -2.71508100 | 1.14612000  |
| H | 0.97315900  | -2.26253700 | 1.28041500  |
| H | 0.29758200  | -3.53041400 | 2.33779400  |
| C | -1.07140400 | -0.57378700 | 2.52335500  |
| C | -1.48797300 | 0.43193800  | 3.56775800  |
| H | -1.88329400 | -0.04848400 | 4.46392400  |
| H | -0.63824200 | 1.05256800  | 3.86299400  |
| H | -2.25112000 | 1.07190400  | 3.13151500  |
| O | -1.50617800 | -0.44491500 | 1.34721000  |
| N | 3.24711400  | 0.56405600  | 1.73740000  |
| C | 4.12683100  | 1.37244300  | 2.58084800  |
| C | 3.78483800  | -0.74607000 | 1.36354500  |
| C | 2.02731100  | 0.93763400  | 1.33532400  |
| H | 5.03180500  | 1.63356300  | 2.02662500  |
| H | 3.63972800  | 2.28441200  | 2.90873200  |
| H | 4.41044100  | 0.79269800  | 3.46234000  |
| H | 3.17323600  | -1.18433100 | 0.58163300  |
| H | 4.80715600  | -0.62115300 | 1.00202600  |
| H | 3.79567900  | -1.40872100 | 2.23288400  |

|   |            |            |            |
|---|------------|------------|------------|
| C | 1.49608900 | 2.30049700 | 1.70675100 |
| O | 1.32865100 | 0.15839600 | 0.64108100 |
| H | 2.15664000 | 3.09156400 | 1.34668400 |
| H | 0.51884500 | 2.42090200 | 1.24769300 |
| H | 1.40133900 | 2.40491500 | 2.78945200 |

### D-In5

Thermal Correction to Free Energy: 0.333948 Hartree

SCF energy: -1321.150147 Hartree

Gibbs free energy: -1320.816199 Hartree

Coordinates:

|    |             |             |             |
|----|-------------|-------------|-------------|
| C  | 1.52174000  | 2.74884100  | 0.19906700  |
| C  | 2.93535000  | 0.94951600  | -0.41131400 |
| C  | 3.79923800  | 1.84547100  | -1.08028500 |
| C  | 3.51299600  | 3.19077300  | -1.09004400 |
| C  | 2.35014600  | 3.65660400  | -0.43472200 |
| H  | 4.68209300  | 1.47336400  | -1.58355000 |
| H  | 4.17089800  | 3.88767600  | -1.59642400 |
| H  | 2.10290600  | 4.71071100  | -0.42379700 |
| C  | 3.13780200  | -0.47172900 | -0.32262600 |
| C  | 4.23073700  | -1.16882600 | -0.88413300 |
| C  | 4.32122200  | -2.53339700 | -0.73718300 |
| H  | 4.99359400  | -0.62936800 | -1.43052300 |
| C  | 2.25403900  | -2.50785200 | 0.50599400  |
| C  | 3.30680900  | -3.22217800 | -0.02791200 |
| H  | 5.15657100  | -3.07757300 | -1.16217500 |
| H  | 3.35125200  | -4.29623600 | 0.10202100  |
| N  | 1.80506200  | 1.42134900  | 0.22773500  |
| N  | 2.16451700  | -1.15686400 | 0.38063800  |
| C  | 0.25320700  | 3.17303900  | 0.88551600  |
| H  | 0.17183600  | 2.70078600  | 1.86671600  |
| H  | 0.20108600  | 4.25732600  | 0.99081900  |
| H  | -0.61450400 | 2.83334700  | 0.31242800  |
| C  | 1.13390200  | -3.16597500 | 1.26132200  |
| H  | 1.28806000  | -4.24077300 | 1.36098800  |
| H  | 1.03952800  | -2.72677000 | 2.25954100  |
| H  | 0.18287300  | -2.99228700 | 0.74741500  |
| Ni | 0.59307400  | -0.04508700 | 0.85737500  |
| C  | -0.69386300 | -1.04775200 | -1.53338000 |
| H  | -0.78486200 | -2.10944900 | -1.29114000 |
| C  | -1.00505800 | -0.13866900 | -0.44298600 |
| H  | -1.13367600 | 0.89184900  | -0.79337500 |
| C  | -2.15395100 | -0.54287200 | 0.49523100  |
| C  | -1.99853300 | 0.11814500  | 1.89289300  |

|   |             |             |             |
|---|-------------|-------------|-------------|
| O | -2.98380500 | 0.38634900  | 2.58249200  |
| O | -0.77283400 | 0.30382100  | 2.27242600  |
| C | -0.24939900 | -0.73643400 | -2.77037900 |
| H | 0.03743000  | -1.50213800 | -3.48283300 |
| H | -0.14056500 | 0.29818900  | -3.08548700 |
| H | -2.03983800 | -1.61590200 | 0.70474700  |
| C | -3.51741300 | -0.33489200 | -0.12819000 |
| C | -4.24099100 | -1.40930700 | -0.65581100 |
| C | -4.05023300 | 0.95381400  | -0.27629400 |
| C | -5.45745600 | -1.20959100 | -1.31176000 |
| H | -3.84530700 | -2.41531400 | -0.55496500 |
| C | -5.26243900 | 1.15985900  | -0.92788800 |
| H | -3.50813600 | 1.79924800  | 0.13266900  |
| C | -5.97387200 | 0.07681200  | -1.45147400 |
| H | -5.99989000 | -2.05970100 | -1.71216500 |
| H | -5.65686100 | 2.16578700  | -1.02745600 |
| H | -6.91838900 | 0.23650500  | -1.95974100 |

### S-In5

Thermal Correction to Free Energy: 0.332424 Hartree

SCF energy: -1321.198106 Hartree

Gibbs free energy: -1320.865682 Hartree

Coordinates:

|   |            |             |             |
|---|------------|-------------|-------------|
| C | 2.74739800 | 2.52410500  | -0.12769600 |
| C | 3.29550800 | 0.22657300  | -0.43412100 |
| C | 4.57067200 | 0.61521600  | -0.95372300 |
| C | 4.90792000 | 1.93451000  | -1.05886100 |
| C | 3.97318100 | 2.92666600  | -0.62134100 |
| H | 5.28560000 | -0.15394100 | -1.22594300 |
| H | 5.88185000 | 2.22828900  | -1.43825900 |
| H | 4.20582700 | 3.98242200  | -0.69747100 |
| C | 2.88359100 | -1.09286600 | -0.23213900 |
| C | 3.53878100 | -2.25968900 | -0.73468800 |
| C | 3.11540300 | -3.50899900 | -0.38194400 |
| H | 4.36980900 | -2.14096300 | -1.42298000 |
| C | 1.34805400 | -2.50099600 | 0.94670700  |
| C | 2.01104000 | -3.63036600 | 0.53456900  |
| H | 3.60094400 | -4.39511200 | -0.77795000 |
| H | 1.73793000 | -4.59552900 | 0.94667000  |
| N | 2.35502000 | 1.22066700  | -0.05987100 |
| N | 1.68750600 | -1.23723200 | 0.53183900  |
| C | 1.74612900 | 3.55327600  | 0.32562800  |
| H | 1.48316600 | 3.40326100  | 1.37532600  |
| H | 2.13383100 | 4.56539800  | 0.19085500  |

|    |             |             |             |
|----|-------------|-------------|-------------|
| H  | 0.80803600  | 3.44329500  | -0.22307800 |
| C  | 0.28123100  | -2.58693800 | 2.00943800  |
| H  | -0.12654200 | -3.59741600 | 2.09243500  |
| H  | 0.70919800  | -2.30606800 | 2.97994300  |
| H  | -0.52705400 | -1.88544700 | 1.81081900  |
| Ni | 0.58059700  | 0.29762100  | 0.46934600  |
| C  | -1.29058100 | -1.70933100 | -0.77944100 |
| H  | -1.56872000 | -2.42910400 | -0.00921300 |
| C  | -1.13952700 | -0.32119200 | -0.33655300 |
| H  | -1.12004800 | 0.33849500  | -1.21972200 |
| C  | -2.22835900 | 0.18811200  | 0.62537900  |
| C  | -1.79731000 | 1.57264400  | 1.16106900  |
| O  | -2.62593000 | 2.37668900  | 1.60694700  |
| O  | -0.52639800 | 1.78179800  | 1.12250000  |
| C  | -1.10157100 | -2.19079400 | -2.02000800 |
| H  | -1.17873600 | -3.25057000 | -2.24044300 |
| H  | -0.83238500 | -1.53532200 | -2.84512100 |
| H  | -2.23591100 | -0.46333100 | 1.51025300  |
| C  | -3.62241600 | 0.17623000  | 0.03579300  |
| C  | -4.57453500 | -0.76504800 | 0.44026400  |
| C  | -3.97172100 | 1.06267600  | -0.99321700 |
| C  | -5.83536700 | -0.82334500 | -0.15727400 |
| H  | -4.32422800 | -1.46339900 | 1.23312900  |
| C  | -5.22624400 | 1.01118400  | -1.59359500 |
| H  | -3.24806400 | 1.80207900  | -1.31945000 |
| C  | -6.16704400 | 0.06470900  | -1.17829800 |
| H  | -6.55632000 | -1.56304100 | 0.17519700  |
| H  | -5.47464200 | 1.70972000  | -2.38597100 |
| H  | -7.14470900 | 0.02292500  | -1.64575600 |

### D-In6

Thermal Correction to Free Energy: 0.335249 Hartree

SCF energy: -1321.167498 Hartree

Gibbs free energy: -1320.832249 Hartree

Coordinates:

|   |             |             |            |
|---|-------------|-------------|------------|
| C | -0.72216400 | 3.00902800  | 0.50147100 |
| C | 0.66507100  | 1.22811000  | 1.19689300 |
| C | 1.76889400  | 2.10276400  | 1.27202500 |
| C | 1.60762500  | 3.43206100  | 0.95546500 |
| C | 0.33365900  | 3.89822000  | 0.56038400 |
| H | 2.74186100  | 1.72389100  | 1.55252200 |
| H | 2.44927300  | 4.11341700  | 1.00102200 |
| H | 0.17615300  | 4.93972500  | 0.30912100 |
| C | 0.71605100  | -0.18236100 | 1.49909400 |

|    |             |             |             |
|----|-------------|-------------|-------------|
| C  | 1.87446500  | -0.86576000 | 1.91530700  |
| C  | 1.81181900  | -2.21617900 | 2.17791400  |
| H  | 2.81192500  | -0.33571600 | 2.01376300  |
| C  | -0.52271000 | -2.19072600 | 1.58012100  |
| C  | 0.58617600  | -2.89341900 | 2.01593800  |
| H  | 2.69692200  | -2.75411200 | 2.49685100  |
| H  | 0.50635000  | -3.95460800 | 2.21674400  |
| N  | -0.57458400 | 1.69908100  | 0.82682800  |
| N  | -0.47311800 | -0.85684500 | 1.33713200  |
| C  | -2.10187000 | 3.42384900  | 0.07379300  |
| H  | -2.83826700 | 3.10750200  | 0.81912300  |
| H  | -2.17613600 | 4.50287100  | -0.06509300 |
| H  | -2.36996900 | 2.93008500  | -0.86575200 |
| C  | -1.84217300 | -2.86193600 | 1.32512200  |
| H  | -1.85214500 | -3.88382600 | 1.70617200  |
| H  | -2.65546900 | -2.29050100 | 1.77780600  |
| H  | -2.04766700 | -2.88480300 | 0.25073100  |
| Ni | -1.82002800 | 0.24428500  | 0.33878900  |
| C  | -0.15906700 | -0.49224400 | -1.71563100 |
| H  | -0.05866300 | -1.57007200 | -1.58784400 |
| C  | -1.50054100 | -0.01524300 | -1.73187600 |
| H  | -1.62504300 | 1.00842000  | -2.09633000 |
| C  | -2.64203800 | -0.94474100 | -2.10740100 |
| H  | -2.30708100 | -1.98720900 | -2.02518600 |
| H  | -2.98459900 | -0.81920300 | -3.14177100 |
| C  | -3.88154200 | -0.84376400 | -1.19379400 |
| O  | -4.98687600 | -1.19882400 | -1.61102900 |
| O  | -3.65984200 | -0.41643800 | 0.01132000  |
| C  | 0.98879600  | 0.26158800  | -1.71481500 |
| H  | 0.87634100  | 1.33996700  | -1.80836600 |
| C  | 2.34285300  | -0.20760200 | -1.52746600 |
| C  | 3.40946500  | 0.72525100  | -1.50791200 |
| C  | 2.69391500  | -1.56653300 | -1.33272500 |
| C  | 4.72822900  | 0.33021400  | -1.31368800 |
| H  | 3.18013400  | 1.77838300  | -1.63613200 |
| C  | 4.01357900  | -1.95778500 | -1.14837500 |
| H  | 1.91775900  | -2.32263600 | -1.31190700 |
| C  | 5.04969500  | -1.01819300 | -1.13643200 |
| H  | 5.51331100  | 1.08023300  | -1.30129000 |
| H  | 4.23827700  | -3.00980500 | -1.00083100 |
| H  | 6.07770800  | -1.32889300 | -0.98803400 |

### S-In6

Thermal Correction to Free Energy: 0.337702 Hartree

SCF energy: -1321.218339 Hartree

Gibbs free energy: -1320.880637 Hartree

Coordinates:

|    |             |             |             |
|----|-------------|-------------|-------------|
| C  | 1.46397300  | 2.68937200  | -0.42411900 |
| C  | -0.38821800 | 1.40448200  | -1.21879600 |
| C  | -1.20511000 | 2.56331400  | -1.14243300 |
| C  | -0.69406300 | 3.76222400  | -0.72412300 |
| C  | 0.69847900  | 3.82718700  | -0.38481200 |
| H  | -2.25899300 | 2.47873500  | -1.38242200 |
| H  | -1.32278900 | 4.64267000  | -0.64706300 |
| H  | 1.15984400  | 4.77524000  | -0.13114800 |
| C  | -0.82718200 | 0.14686700  | -1.69402300 |
| C  | -2.06418900 | -0.07702400 | -2.36899800 |
| C  | -2.39557200 | -1.33358200 | -2.80439800 |
| H  | -2.73379300 | 0.75503100  | -2.55140800 |
| C  | -0.27226500 | -2.13814100 | -1.98447700 |
| C  | -1.47495800 | -2.40097900 | -2.62097300 |
| H  | -3.33934000 | -1.50684400 | -3.31212500 |
| H  | -1.70634400 | -3.40475900 | -2.95696600 |
| N  | 0.96751600  | 1.46065600  | -0.80555000 |
| N  | 0.04808700  | -0.92145900 | -1.48618200 |
| C  | 2.93980600  | 2.74115700  | -0.12470000 |
| H  | 3.50875900  | 2.42165600  | -1.00629200 |
| H  | 3.25685900  | 3.74856100  | 0.15559000  |
| H  | 3.20007300  | 2.04721400  | 0.67633800  |
| C  | 0.76032300  | -3.22116000 | -1.80938100 |
| H  | 0.33345400  | -4.21199000 | -1.98070300 |
| H  | 1.58016400  | -3.07588900 | -2.52348800 |
| H  | 1.20776300  | -3.16489200 | -0.81627100 |
| Ni | 1.57165000  | -0.20226800 | -0.14376300 |
| C  | 0.23410800  | -0.26728100 | 1.90815000  |
| H  | 0.13169300  | -1.34684500 | 2.02409400  |
| C  | 1.59269700  | 0.21994800  | 1.81362500  |
| H  | 1.69023100  | 1.29025600  | 2.00231000  |
| C  | 2.70060800  | -0.63056100 | 2.42100900  |
| H  | 2.52349500  | -0.93263300 | 3.46262800  |
| H  | 3.63744000  | -0.05930800 | 2.42384300  |
| C  | 2.99011700  | -1.89436700 | 1.59318800  |
| O  | 3.55949600  | -2.86634100 | 2.10922500  |
| O  | 2.62715900  | -1.83174000 | 0.35572600  |
| C  | -0.91354200 | 0.48314500  | 1.79430900  |
| H  | -0.79479600 | 1.55690200  | 1.67358300  |
| C  | -2.26293800 | -0.00943800 | 1.68217600  |
| C  | -3.34465300 | 0.90428800  | 1.57261300  |

|   |             |             |            |
|---|-------------|-------------|------------|
| C | -2.60641900 | -1.38811100 | 1.64938600 |
| C | -4.66084800 | 0.47755500  | 1.44964400 |
| H | -3.12433000 | 1.96763700  | 1.57182000 |
| C | -3.92508600 | -1.80830100 | 1.53195400 |
| H | -1.82172300 | -2.13459400 | 1.70087800 |
| C | -4.97369100 | -0.88633900 | 1.43512900 |
| H | -5.45394900 | 1.21479400  | 1.36421700 |
| H | -4.14092800 | -2.87260700 | 1.50728100 |
| H | -6.00065700 | -1.22086600 | 1.34154200 |

### D-TS5

Thermal Correction to Free Energy: 0.340995 Hartree

SCF energy: -1509.793154 Hartree

Gibbs free energy: -1509.452159 Hartree

Coordinates:

|    |             |             |             |
|----|-------------|-------------|-------------|
| C  | -1.52632300 | 2.76871500  | 0.66836600  |
| C  | -2.86851200 | 0.83239500  | 0.83884700  |
| C  | -3.48759600 | 1.34614800  | 1.99502500  |
| C  | -3.11516100 | 2.58410200  | 2.47239200  |
| C  | -2.11566600 | 3.31178000  | 1.79597300  |
| H  | -4.24600700 | 0.76990100  | 2.50783900  |
| H  | -3.58398700 | 2.99352900  | 3.35947100  |
| H  | -1.80818700 | 4.28914400  | 2.14604100  |
| C  | -3.18091200 | -0.44814000 | 0.24066600  |
| C  | -4.17014900 | -1.33095100 | 0.71509000  |
| C  | -4.38512900 | -2.52696700 | 0.06602100  |
| H  | -4.75656800 | -1.07231500 | 1.58685000  |
| C  | -2.64240300 | -1.95285300 | -1.49848000 |
| C  | -3.60056600 | -2.84698600 | -1.06298800 |
| H  | -5.14362700 | -3.21559500 | 0.41885200  |
| H  | -3.74465100 | -3.78068400 | -1.59205100 |
| N  | -1.90081900 | 1.55630100  | 0.18551000  |
| N  | -2.43784300 | -0.76319200 | -0.87231600 |
| C  | -0.44157900 | 3.47987500  | -0.08941700 |
| H  | -0.65757300 | 3.46931200  | -1.16020500 |
| H  | -0.32509500 | 4.50884800  | 0.25187000  |
| H  | 0.51130400  | 2.95788500  | 0.03414400  |
| C  | -1.76071900 | -2.22891500 | -2.68255700 |
| H  | -2.02056400 | -3.16770100 | -3.17183300 |
| H  | -1.83693900 | -1.41337200 | -3.40850800 |
| H  | -0.71280700 | -2.27470400 | -2.36735000 |
| Ni | -0.91010100 | 0.46528400  | -1.16268700 |
| C  | 0.35796500  | -1.26238100 | 0.52119100  |
| H  | 0.44704300  | -2.17074300 | -0.07640600 |



|   |             |             |             |
|---|-------------|-------------|-------------|
| C | 0.81585200  | -0.07595500 | -0.08418800 |
| H | 0.92725200  | 0.77237900  | 0.59366200  |
| C | 1.87443700  | -0.12417000 | -1.18206500 |
| C | 1.61570000  | 0.94044200  | -2.28498800 |
| O | 2.54503700  | 1.40312000  | -2.94642600 |
| O | 0.36742400  | 1.23765900  | -2.47273800 |
| H | 1.75282600  | -1.07886500 | -1.71115200 |
| C | 3.26727400  | -0.08841100 | -0.58807700 |
| C | 3.97117300  | -1.27432900 | -0.35393100 |
| C | 3.83573800  | 1.11571500  | -0.15155800 |
| C | 5.20614200  | -1.26305200 | 0.29545700  |
| H | 3.54268100  | -2.21849400 | -0.67523700 |
| C | 5.06747800  | 1.13282200  | 0.49736900  |
| H | 3.30996300  | 2.04599200  | -0.33316400 |
| C | 5.76002600  | -0.05840200 | 0.72467500  |
| H | 5.73337000  | -2.19553800 | 0.46660100  |
| H | 5.49026500  | 2.07655400  | 0.82550900  |
| H | 6.71926200  | -0.04573900 | 1.23011100  |
| C | 1.82910500  | -1.86385500 | 2.70637300  |
| O | 2.21833400  | -0.79417400 | 3.04378800  |
| O | 1.94204100  | -3.04303000 | 2.61222000  |
| C | -0.17411100 | -1.40480800 | 1.79348200  |
| H | -0.71406000 | -2.30899900 | 2.04979600  |
| H | -0.40553500 | -0.52002100 | 2.37723000  |

### D-TS6

Thermal Correction to Free Energy: 0.340834 Hartree

SCF energy: -1509.809119 Hartree

Gibbs free energy: -1509.468286 Hartree

Coordinates:

|   |             |             |             |
|---|-------------|-------------|-------------|
| C | 0.90436400  | 3.07820400  | 0.14425600  |
| C | -0.54585100 | 1.73285400  | -1.13251600 |
| C | -1.56566700 | 2.69101000  | -1.02056600 |
| C | -1.33163400 | 3.85124300  | -0.31030000 |
| C | -0.07377500 | 4.04945900  | 0.28237700  |
| H | -2.53080200 | 2.51430800  | -1.47338000 |
| H | -2.10925700 | 4.59889400  | -0.20913200 |
| H | 0.14089700  | 4.95190300  | 0.84071300  |
| C | -0.68260800 | 0.47479800  | -1.84939700 |
| C | -1.85952800 | 0.05801100  | -2.48800100 |
| C | -1.87834600 | -1.15303100 | -3.14962600 |
| H | -2.74973300 | 0.66927600  | -2.44626800 |
| C | 0.40992100  | -1.51021300 | -2.48743900 |
| C | -0.72011700 | -1.94558800 | -3.16023000 |

|    |             |             |             |
|----|-------------|-------------|-------------|
| H  | -2.77988800 | -1.49263700 | -3.64510100 |
| H  | -0.70450500 | -2.89916000 | -3.67317800 |
| N  | 0.67715000  | 1.93904500  | -0.55470800 |
| N  | 0.43492500  | -0.31442700 | -1.84806400 |
| C  | 2.27066200  | 3.22376400  | 0.75099600  |
| H  | 3.03862000  | 3.07724100  | -0.01466200 |
| H  | 2.40633500  | 4.20343000  | 1.20931300  |
| H  | 2.43125800  | 2.45433900  | 1.51165000  |
| C  | 1.65854200  | -2.33926600 | -2.39836400 |
| H  | 1.63148100  | -3.17931300 | -3.09298600 |
| H  | 2.54047400  | -1.72516000 | -2.59120100 |
| H  | 1.77342100  | -2.72966000 | -1.38225200 |
| Ni | 1.82474000  | 0.32271000  | -0.55122400 |
| C  | 0.32301800  | -0.95735000 | 1.19478600  |
| H  | 0.18662600  | -1.92771000 | 0.72076400  |
| C  | 1.64220400  | -0.58058000 | 1.42401500  |
| H  | 1.79810600  | 0.29520200  | 2.05446600  |
| C  | 2.78322600  | -1.57403000 | 1.39349700  |
| C  | 3.95665300  | -1.19461600 | 0.46489900  |
| O  | 5.07913800  | -1.65949800 | 0.67158700  |
| O  | 3.65778200  | -0.41912500 | -0.53113400 |
| H  | 2.41974800  | -2.54183300 | 1.02537000  |
| C  | -0.90957100 | -0.98609700 | 3.61719800  |
| O  | -1.65413500 | -1.91358300 | 3.61449300  |
| O  | -0.17681300 | -0.24057100 | 4.18810100  |
| C  | -0.84386000 | -0.22815900 | 1.51277200  |
| H  | -0.68952400 | 0.80473200  | 1.81212800  |
| H  | 3.19703600  | -1.76263200 | 2.39017500  |
| C  | -2.16610800 | -0.51896600 | 0.96997900  |
| C  | -3.16346500 | 0.48047700  | 0.98066900  |
| C  | -2.53995600 | -1.78187700 | 0.46528300  |
| C  | -4.44525000 | 0.24088600  | 0.49999000  |
| H  | -2.90900000 | 1.46644400  | 1.35563500  |
| C  | -3.82389700 | -2.02211000 | -0.01239100 |
| H  | -1.81560100 | -2.58738300 | 0.44405700  |
| C  | -4.79213300 | -1.01631700 | -0.00253700 |
| H  | -5.17942400 | 1.04056900  | 0.51492300  |
| H  | -4.07095800 | -3.00584600 | -0.39943200 |
| H  | -5.79128000 | -1.20603100 | -0.37839900 |

### S-TS5

Thermal Correction to Free Energy: 0.340944 Hartree

SCF energy: -1509.840401 Hartree

Gibbs free energy: -1509.499458 Hartree

## Coordinates:

|    |             |             |             |
|----|-------------|-------------|-------------|
| C  | -2.92395200 | -2.47383600 | -0.75040300 |
| C  | -3.46941500 | -0.17253700 | -0.62845100 |
| C  | -4.68535600 | -0.42743000 | -1.32228400 |
| C  | -4.99372300 | -1.69834600 | -1.73319000 |
| C  | -4.08899300 | -2.75592600 | -1.43826600 |
| H  | -5.38460000 | 0.38405400  | -1.48834400 |
| H  | -5.92491800 | -1.90111000 | -2.25198000 |
| H  | -4.29076800 | -3.76837300 | -1.76825500 |
| C  | -3.09409700 | 1.09149000  | -0.11359900 |
| C  | -3.69019200 | 2.32497300  | -0.48731700 |
| C  | -3.32424200 | 3.49527400  | 0.12259500  |
| H  | -4.42560100 | 2.33342500  | -1.28465400 |
| C  | -1.75264600 | 2.24145200  | 1.48500900  |
| C  | -2.34270500 | 3.43778500  | 1.16339400  |
| H  | -3.76262200 | 4.44237300  | -0.17160400 |
| H  | -2.09759600 | 4.32514900  | 1.73649400  |
| N  | -2.57813200 | -1.21591800 | -0.35934200 |
| N  | -2.05988900 | 1.05719500  | 0.84883200  |
| C  | -1.92533300 | -3.55892900 | -0.45033200 |
| H  | -1.64516300 | -3.54404500 | 0.60353500  |
| H  | -2.31179200 | -4.54303700 | -0.72332900 |
| H  | -0.99660200 | -3.37733300 | -1.00153700 |
| C  | -0.80946100 | 2.13681600  | 2.65403800  |
| H  | -0.51338700 | 3.12223900  | 3.02115600  |
| H  | -1.29570000 | 1.58817500  | 3.47013300  |
| H  | 0.08230400  | 1.56858800  | 2.39117000  |
| Ni | -0.94463800 | -0.47636900 | 0.73338900  |
| C  | 1.00493800  | 1.43652200  | -0.13309000 |
| H  | 1.32821200  | 2.00859900  | 0.73645500  |
| C  | 0.92252000  | 0.03398100  | 0.03825400  |
| H  | 0.86126900  | -0.51464300 | -0.91046000 |
| C  | 1.87553100  | -0.64415500 | 1.02620900  |
| C  | 1.28154700  | -1.99229800 | 1.49992800  |
| O  | 2.00997100  | -2.89070000 | 1.94082100  |
| O  | -0.00199100 | -2.06007900 | 1.42977700  |
| H  | 1.90700400  | -0.02641500 | 1.93390900  |
| C  | 3.28444300  | -0.73694100 | 0.47570800  |
| C  | 4.22912600  | 0.25328200  | 0.76734500  |
| C  | 3.64690200  | -1.74667000 | -0.42663800 |
| C  | 5.49419000  | 0.24228800  | 0.17877000  |
| H  | 3.96514800  | 1.05058500  | 1.45510300  |
| C  | 4.90702900  | -1.76226900 | -1.01899100 |
| H  | 2.93336200  | -2.52898000 | -0.65861000 |

|   |            |             |             |
|---|------------|-------------|-------------|
| C | 5.83902700 | -0.76613600 | -0.71944700 |
| H | 6.20683200 | 1.02435200  | 0.41857800  |
| H | 5.16521000 | -2.55374600 | -1.71493000 |
| H | 6.82038300 | -0.77763600 | -1.18076000 |
| C | 2.91821400 | 2.26385300  | -1.91784500 |
| O | 3.37411900 | 3.16974900  | -1.29941700 |
| O | 2.99518500 | 1.39080000  | -2.71843500 |
| C | 0.75442900 | 2.16887800  | -1.27783400 |
| H | 0.59111400 | 3.23886000  | -1.20649300 |
| H | 0.33897900 | 1.67340000  | -2.15025000 |

### S-TS6

Thermal Correction to Free Energy: 0.343142 Hartree

SCF energy: -1509.864394 Hartree

Gibbs free energy: -1509.521252 Hartree

Coordinates:

|    |             |             |             |
|----|-------------|-------------|-------------|
| C  | -1.47565800 | 0.42468700  | 2.86118800  |
| C  | 0.46502000  | -0.66913900 | 2.01670400  |
| C  | 1.26413800  | 0.06181800  | 2.92525700  |
| C  | 0.70043600  | 0.95935100  | 3.79642800  |
| C  | -0.71886900 | 1.11514400  | 3.77488700  |
| H  | 2.33938900  | -0.06794900 | 2.89992100  |
| H  | 1.31086700  | 1.53526100  | 4.48263300  |
| H  | -1.21165600 | 1.75228600  | 4.50111200  |
| C  | 0.98046900  | -1.64761900 | 1.11845300  |
| C  | 2.28128400  | -2.21215000 | 1.21184700  |
| C  | 2.68925000  | -3.15066000 | 0.29614300  |
| H  | 2.94387000  | -1.91132800 | 2.01369200  |
| C  | 0.51533700  | -3.02810700 | -0.73925300 |
| C  | 1.78747400  | -3.57939300 | -0.70672700 |
| H  | 3.68544100  | -3.57703400 | 0.35479100  |
| H  | 2.08055100  | -4.31623400 | -1.44500200 |
| N  | -0.92761900 | -0.45217400 | 1.94380000  |
| N  | 0.11866600  | -2.05989200 | 0.11721200  |
| C  | -2.97814800 | 0.53017000  | 2.86299900  |
| H  | -3.41861000 | -0.46905800 | 2.96183100  |
| H  | -3.33284400 | 1.15923100  | 3.68280900  |
| H  | -3.34887800 | 0.93726600  | 1.92065000  |
| C  | -0.50348000 | -3.48387200 | -1.74952500 |
| H  | -0.03397200 | -4.02457800 | -2.57419700 |
| H  | -1.22899400 | -4.15396900 | -1.27317300 |
| H  | -1.07401700 | -2.63407700 | -2.12589400 |
| Ni | -1.61445900 | -0.73687600 | 0.20958800  |
| C  | -0.66800500 | 1.09960900  | -0.92926600 |

|   |             |             |             |
|---|-------------|-------------|-------------|
| H | -0.58215400 | 0.67564700  | -1.92865200 |
| C | -1.97925800 | 1.17331000  | -0.38497100 |
| H | -2.08276800 | 1.83667500  | 0.47238000  |
| C | -3.18602000 | 1.09900200  | -1.30471800 |
| H | -3.19836500 | 1.87291700  | -2.08364200 |
| H | -4.09993400 | 1.24426300  | -0.71545600 |
| C | -3.34525800 | -0.27524900 | -1.98330100 |
| O | -4.00972100 | -0.37688600 | -3.02421100 |
| O | -2.77948600 | -1.26128300 | -1.37484800 |
| C | 0.50741800  | 1.57252500  | -0.31616100 |
| H | 0.39479200  | 1.95652300  | 0.69286100  |
| C | 1.85462500  | 1.19697200  | -0.68443900 |
| C | 2.94182000  | 1.56303700  | 0.14718800  |
| C | 2.17960100  | 0.49356300  | -1.86931500 |
| C | 4.25416700  | 1.24709200  | -0.17721600 |
| H | 2.72927600  | 2.08580400  | 1.07469200  |
| C | 3.49669300  | 0.18387600  | -2.19392300 |
| H | 1.38666800  | 0.16909900  | -2.53261400 |
| C | 4.55254300  | 0.55676200  | -1.35849600 |
| H | 5.05537100  | 1.53947600  | 0.49535100  |
| H | 3.70185800  | -0.36297600 | -3.10976400 |
| H | 5.57688500  | 0.30999100  | -1.61432800 |
| C | 0.24464600  | 3.67011900  | -1.37225900 |
| O | -0.34217300 | 4.26713300  | -0.53487300 |
| O | 0.76983200  | 3.52967200  | -2.42250300 |

### D-In7

Thermal Correction to Free Energy: 0.347163 Hartree

SCF energy: -1509.825146 Hartree

Gibbs free energy: -1509.477982 Hartree

Coordinates:

|   |             |             |             |
|---|-------------|-------------|-------------|
| C | -1.26506700 | 2.82524100  | 0.54333600  |
| C | -2.90313800 | 1.15932800  | 0.38780000  |
| C | -3.74820600 | 1.86006000  | 1.24969700  |
| C | -3.32679200 | 3.07930900  | 1.76101100  |
| C | -2.07723800 | 3.57017600  | 1.39782300  |
| H | -4.71767800 | 1.46509200  | 1.51756400  |
| H | -3.96705300 | 3.64255200  | 2.42900200  |
| H | -1.72573300 | 4.52455000  | 1.76919200  |
| C | -3.26572100 | -0.12978900 | -0.23309000 |
| C | -4.50060400 | -0.75742600 | -0.05093400 |
| C | -4.74835500 | -1.95898200 | -0.69714300 |
| H | -5.25718500 | -0.31643800 | 0.58231500  |
| C | -2.54736100 | -1.84421400 | -1.66203500 |

|    |             |             |             |
|----|-------------|-------------|-------------|
| C  | -3.76109300 | -2.50603100 | -1.51607400 |
| H  | -5.69862000 | -2.46281000 | -0.56984400 |
| H  | -3.92813100 | -3.43874000 | -2.03947400 |
| N  | -1.67661700 | 1.63732300  | 0.05280900  |
| N  | -2.30736800 | -0.67536500 | -1.02445900 |
| C  | 0.10028700  | 3.31491400  | 0.14987000  |
| H  | 0.39091600  | 2.91457900  | -0.82100100 |
| H  | 0.12724200  | 4.40539700  | 0.12461900  |
| H  | 0.84461500  | 2.98371900  | 0.88096900  |
| C  | -1.43953300 | -2.37221200 | -2.52505300 |
| H  | -1.73069600 | -3.28554300 | -3.04291300 |
| H  | -1.14700800 | -1.61962900 | -3.26319300 |
| H  | -0.55560000 | -2.57925300 | -1.91473400 |
| Ni | -0.56517000 | 0.28117400  | -0.98298400 |
| C  | 0.40030900  | -1.11047700 | 0.63569800  |
| H  | 0.42291900  | -2.07735900 | 0.14058600  |
| C  | 1.26784800  | -0.14264800 | 0.23605700  |
| H  | 1.35742900  | 0.75688000  | 0.84109300  |
| C  | 2.30242400  | -0.29161400 | -0.85902500 |
| C  | 2.05601300  | 0.70843900  | -2.03676600 |
| O  | 3.00019900  | 1.09521000  | -2.72241000 |
| O  | 0.81857300  | 1.02067400  | -2.23554800 |
| H  | 2.16710800  | -1.27955800 | -1.31484700 |
| C  | 3.70212400  | -0.20891300 | -0.28647500 |
| C  | 4.49223800  | -1.35353200 | -0.15318500 |
| C  | 4.21147200  | 1.01179900  | 0.17515200  |
| C  | 5.76219700  | -1.28492600 | 0.42167500  |
| H  | 4.10964500  | -2.30774800 | -0.50088700 |
| C  | 5.47552600  | 1.08477700  | 0.75341700  |
| H  | 3.61500000  | 1.91141400  | 0.07044000  |
| C  | 6.25764200  | -0.06532700 | 0.87855200  |
| H  | 6.36160600  | -2.18416300 | 0.51310000  |
| H  | 5.85388200  | 2.03900500  | 1.10373400  |
| H  | 7.24334800  | -0.00904200 | 1.32668400  |
| C  | -0.10672300 | -2.18679100 | 2.89778200  |
| O  | -0.31153600 | -1.90559100 | 4.10130500  |
| O  | 0.29479000  | -3.27539500 | 2.41683700  |
| C  | -0.44026700 | -1.05152800 | 1.87185500  |
| H  | -1.49785400 | -1.18978500 | 1.61357900  |
| H  | -0.35959400 | -0.07668300 | 2.35796900  |

### D-In8

Thermal Correction to Free Energy: 0.349688 Hartree

SCF energy: -1509.836819 Hartree

Gibbs free energy: -1509.487131 Hartree

Coordinates:

|    |             |             |             |
|----|-------------|-------------|-------------|
| C  | -0.56148500 | -0.37939000 | 2.85750300  |
| C  | -1.59842300 | 1.03780800  | 1.31989400  |
| C  | -2.78865400 | 1.01316300  | 2.04668800  |
| C  | -2.85592400 | 0.25098600  | 3.20368000  |
| C  | -1.73077500 | -0.45209400 | 3.61493000  |
| H  | -3.65004400 | 1.57670600  | 1.71990500  |
| H  | -3.77217500 | 0.21101400  | 3.78013800  |
| H  | -1.74752500 | -1.04953300 | 4.51739500  |
| C  | -1.44523200 | 1.81114600  | 0.06506700  |
| C  | -2.50735100 | 2.47364500  | -0.54998900 |
| C  | -2.27868700 | 3.14932100  | -1.74030500 |
| H  | -3.49980700 | 2.44981600  | -0.12504400 |
| C  | 0.02177100  | 2.45521200  | -1.63330800 |
| C  | -1.00301200 | 3.13671700  | -2.29065500 |
| H  | -3.08873300 | 3.66831200  | -2.23829100 |
| H  | -0.79438100 | 3.64474800  | -3.22358100 |
| N  | -0.50846500 | 0.34516800  | 1.72310700  |
| N  | -0.20400000 | 1.81784900  | -0.46769600 |
| C  | 0.67817400  | -1.11911500 | 3.27175500  |
| H  | 1.56091600  | -0.48845200 | 3.15275500  |
| H  | 0.61107000  | -1.44935500 | 4.30850300  |
| H  | 0.81634700  | -2.00012100 | 2.64027800  |
| C  | 1.40653800  | 2.37021000  | -2.20661100 |
| H  | 1.54582800  | 3.08500700  | -3.01789200 |
| H  | 2.15195500  | 2.53263600  | -1.42735900 |
| H  | 1.57600500  | 1.36312200  | -2.60009400 |
| Ni | 1.15767600  | 0.61503800  | 0.50817500  |
| C  | 1.48049700  | -1.22372800 | -0.67345300 |
| H  | 1.59345900  | -0.83838800 | -1.68347300 |
| C  | 2.54445800  | -1.10130100 | 0.18327800  |
| H  | 2.54256300  | -1.66789000 | 1.11039000  |
| C  | 3.83711300  | -0.40784100 | -0.16800800 |
| C  | 4.00584000  | 0.99612600  | 0.46362800  |
| O  | 5.13525200  | 1.41569800  | 0.72543800  |
| O  | 2.90818600  | 1.65608100  | 0.62259800  |
| H  | 3.89184500  | -0.25177200 | -1.25182200 |
| C  | 0.64877400  | -3.47672600 | -1.44367700 |
| O  | 0.46302900  | -4.59552100 | -0.91709900 |
| O  | 1.00297500  | -3.21304200 | -2.61628200 |
| C  | 0.36941700  | -2.22736800 | -0.50372300 |
| H  | 0.37255800  | -2.60263800 | 0.52041400  |
| H  | 4.70040900  | -1.01461900 | 0.11440400  |

|   |             |             |             |
|---|-------------|-------------|-------------|
| C | -1.01674800 | -1.71415200 | -0.82430200 |
| C | -2.09144100 | -2.02270800 | 0.01618200  |
| C | -1.27567700 | -0.96797800 | -1.98194300 |
| C | -3.38284100 | -1.58572800 | -0.27532700 |
| H | -1.90824300 | -2.59286100 | 0.92087900  |
| C | -2.56298100 | -0.52923700 | -2.27645600 |
| H | -0.46091100 | -0.73375800 | -2.65452800 |
| C | -3.62452800 | -0.83276700 | -1.42268500 |
| H | -4.19585000 | -1.82106100 | 0.40293000  |
| H | -2.73658400 | 0.06478700  | -3.16704200 |
| H | -4.62485300 | -0.47883400 | -1.64585200 |

### S-In7

Thermal Correction to Free Energy: 0.348972 Hartree

SCF energy: -1509.893748 Hartree

Gibbs free energy: -1509.544776 Hartree

Coordinates:

|    |             |             |             |
|----|-------------|-------------|-------------|
| C  | -0.09998600 | -2.92960500 | -0.39305300 |
| C  | -2.31118000 | -2.16045200 | -0.44287200 |
| C  | -2.76591700 | -3.40736000 | -0.88930300 |
| C  | -1.85191500 | -4.42895500 | -1.09124500 |
| C  | -0.50097100 | -4.18629800 | -0.83461800 |
| H  | -3.81884500 | -3.58159100 | -1.06238500 |
| H  | -2.18316100 | -5.40252700 | -1.43269500 |
| H  | 0.23873000  | -4.96525500 | -0.97376700 |
| C  | -3.20355600 | -1.02385000 | -0.17078300 |
| C  | -4.56897300 | -1.04003800 | -0.47198300 |
| C  | -5.34969200 | 0.05884500  | -0.15231200 |
| H  | -5.01450600 | -1.89896600 | -0.95457200 |
| C  | -3.38440800 | 1.11368300  | 0.77453100  |
| C  | -4.74802000 | 1.13656800  | 0.49822200  |
| H  | -6.40788800 | 0.07128900  | -0.38410500 |
| H  | -5.33510400 | 1.99486300  | 0.80210600  |
| N  | -0.99108400 | -1.92504000 | -0.21085600 |
| N  | -2.60164400 | 0.06443900  | 0.39943000  |
| C  | 1.33328600  | -2.60558400 | -0.10510300 |
| H  | 1.41159400  | -2.11204600 | 0.86369300  |
| H  | 1.96429100  | -3.49528000 | -0.13047600 |
| H  | 1.70657000  | -1.87954400 | -0.83172800 |
| C  | -2.74403500 | 2.25134000  | 1.52147800  |
| H  | -3.49047600 | 2.77846700  | 2.11964100  |
| H  | -1.95659200 | 1.87530600  | 2.17481100  |
| H  | -2.28008300 | 2.97117400  | 0.84145700  |
| Ni | -0.59234600 | 0.03905100  | 0.30724300  |



|   |             |             |             |
|---|-------------|-------------|-------------|
| C | 0.03808800  | 1.82982000  | -0.09481400 |
| H | 0.06955900  | 2.47172000  | 0.79030200  |
| C | 1.10445200  | 0.89894600  | -0.25876300 |
| H | 1.40301400  | 0.65719500  | -1.27929800 |
| C | 2.24863000  | 0.85317200  | 0.76187300  |
| C | 1.85994500  | 0.31353700  | 2.17627300  |
| O | 2.71150900  | 0.46117200  | 3.08042500  |
| O | 0.71628600  | -0.21651400 | 2.31750700  |
| H | 2.54856600  | 1.89165700  | 0.96793600  |
| C | 3.49687200  | 0.19198700  | 0.18766700  |
| C | 4.06417100  | 0.73086700  | -0.97826600 |
| C | 4.11156300  | -0.93342900 | 0.74623800  |
| C | 5.18577300  | 0.15907800  | -1.57394200 |
| H | 3.61039200  | 1.61098200  | -1.42312000 |
| C | 5.23241100  | -1.51496000 | 0.15134800  |
| H | 3.71636000  | -1.35200300 | 1.66231700  |
| C | 5.77484300  | -0.97544300 | -1.01332700 |
| H | 5.60126200  | 0.59992400  | -2.47413700 |
| H | 5.68258700  | -2.39302100 | 0.60299300  |
| H | 6.64618900  | -1.42697500 | -1.47495300 |
| C | -0.19147900 | 3.97706900  | -1.37953600 |
| O | -0.85180800 | 4.79088100  | -0.67375400 |
| O | 0.80928000  | 4.24684800  | -2.09504800 |
| C | -0.62909800 | 2.49730600  | -1.29276900 |
| H | -1.71973400 | 2.45747000  | -1.20541400 |
| H | -0.34491100 | 1.96136600  | -2.20414600 |

### S-In8

Thermal Correction to Free Energy: 0.348410 Hartree

SCF energy: -1509.903683 Hartree

Gibbs free energy: -1509.555273 Hartree

Coordinates:

|   |             |            |             |
|---|-------------|------------|-------------|
| C | -3.29609100 | 0.10371300 | -1.13025600 |
| C | -1.90565500 | 1.90107800 | -0.53321600 |
| C | -2.52995300 | 2.72949800 | -1.47476700 |
| C | -3.55194500 | 2.22849900 | -2.25983200 |
| C | -3.95063100 | 0.89755900 | -2.05679200 |
| H | -2.20416700 | 3.75516800 | -1.59149600 |
| H | -4.04382000 | 2.84985700 | -2.99834600 |
| H | -4.78342800 | 0.48302300 | -2.61314700 |
| C | -0.84413200 | 2.35099600 | 0.35280700  |
| C | -0.52498000 | 3.69987400 | 0.57518100  |
| C | 0.47455800  | 4.01871100 | 1.47441400  |
| H | -1.07430000 | 4.48160700 | 0.06744800  |

|    |             |             |             |
|----|-------------|-------------|-------------|
| C  | 0.79247800  | 1.66248300  | 1.88698200  |
| C  | 1.13706900  | 2.98196400  | 2.14501000  |
| H  | 0.73323200  | 5.05355400  | 1.66653300  |
| H  | 1.92769100  | 3.19766500  | 2.85337900  |
| N  | -2.23869200 | 0.56917900  | -0.39224500 |
| N  | -0.18025700 | 1.34469700  | 0.99459400  |
| C  | -3.73972300 | -1.30952600 | -0.87985000 |
| H  | -3.64495000 | -1.55020400 | 0.18068800  |
| H  | -4.77326600 | -1.45760000 | -1.19935800 |
| H  | -3.10860800 | -2.02037400 | -1.41785600 |
| C  | 1.49995000  | 0.51701100  | 2.54772200  |
| H  | 2.13104300  | 0.86205300  | 3.36901400  |
| H  | 0.77454600  | -0.21594800 | 2.90448500  |
| H  | 2.12271100  | 0.00870200  | 1.80731500  |
| Ni | -0.83912600 | -0.46585900 | 0.52677000  |
| C  | 0.59650100  | -1.69036300 | -0.07260800 |
| H  | 1.24641300  | -1.98089100 | 0.75407100  |
| C  | -0.68552100 | -2.29015300 | -0.17431700 |
| H  | -1.08269700 | -2.43279400 | -1.17982800 |
| C  | -1.18058100 | -3.27278700 | 0.86571800  |
| H  | -0.63496000 | -4.22600900 | 0.84738500  |
| H  | -2.23095800 | -3.52520900 | 0.67140700  |
| C  | -1.14345600 | -2.73582300 | 2.31547300  |
| O  | -1.19064600 | -3.55272600 | 3.25326600  |
| O  | -1.10316300 | -1.46258000 | 2.44313500  |
| C  | 1.34697400  | -1.27378700 | -1.33353500 |
| H  | 0.61259500  | -0.87097200 | -2.03537100 |
| C  | 2.35994800  | -0.18052900 | -1.06241700 |
| C  | 2.04199200  | 1.15139800  | -1.35807400 |
| C  | 3.60746700  | -0.44298700 | -0.47893000 |
| C  | 2.93076200  | 2.18771000  | -1.08087900 |
| H  | 1.07200800  | 1.37761200  | -1.78819500 |
| C  | 4.50064800  | 0.59125200  | -0.19927900 |
| H  | 3.86208700  | -1.47330700 | -0.26596900 |
| C  | 4.16781000  | 1.91317000  | -0.49715000 |
| H  | 2.65109300  | 3.21115900  | -1.30759400 |
| H  | 5.46056900  | 0.36387100  | 0.25386700  |
| H  | 4.86060000  | 2.71796200  | -0.27555500 |
| C  | 1.95733300  | -2.53878200 | -2.03027900 |
| O  | 1.52904600  | -2.78456400 | -3.18678000 |
| O  | 2.78848800  | -3.22051500 | -1.37407500 |

### D-TS7

Thermal Correction to Free Energy: 0.337695 Hartree

SCF energy: -1509.780358 Hartree

Gibbs free energy: -1509.442663 Hartree

Coordinates:

|    |             |             |             |
|----|-------------|-------------|-------------|
| C  | -1.51479900 | 2.67337300  | 0.33195400  |
| C  | -3.45633000 | 1.32560800  | 0.21012000  |
| C  | -4.25905700 | 2.43792300  | 0.54392500  |
| C  | -3.67260700 | 3.66592100  | 0.74999300  |
| C  | -2.27075400 | 3.79089600  | 0.63655300  |
| H  | -5.33173900 | 2.32708900  | 0.63096200  |
| H  | -4.28013200 | 4.52853700  | 0.99779500  |
| H  | -1.78314200 | 4.74533400  | 0.78939200  |
| C  | -3.96474100 | 0.00065300  | -0.04662200 |
| C  | -5.32613000 | -0.36284000 | 0.03592000  |
| C  | -5.70640000 | -1.65737600 | -0.23652500 |
| H  | -6.06875900 | 0.37324100  | 0.31405300  |
| C  | -3.39702300 | -2.21847300 | -0.64161800 |
| C  | -4.72175000 | -2.60790800 | -0.58790300 |
| H  | -6.74941200 | -1.94603300 | -0.17984200 |
| H  | -4.99246700 | -3.63158000 | -0.81352000 |
| N  | -2.08758200 | 1.46332300  | 0.10874300  |
| N  | -3.01465600 | -0.94094400 | -0.38473100 |
| C  | -0.01479300 | 2.72189700  | 0.25004400  |
| H  | 0.33468300  | 2.18605300  | -0.63471400 |
| H  | 0.35293100  | 3.74832300  | 0.23288800  |
| H  | 0.42044100  | 2.21005200  | 1.11335700  |
| C  | -2.29343100 | -3.18003600 | -0.98432500 |
| H  | -2.68084400 | -4.16595600 | -1.24131200 |
| H  | -1.70375900 | -2.79833300 | -1.82333100 |
| H  | -1.60824600 | -3.28005400 | -0.13604900 |
| Ni | -1.13780100 | -0.27792800 | -0.15721900 |
| C  | 0.73106000  | -1.34531500 | 1.04997900  |
| H  | 0.69536800  | -2.31598300 | 0.54822500  |
| C  | 1.84114800  | -0.57097700 | 0.78364300  |
| H  | 1.89040200  | 0.41379300  | 1.24244900  |
| C  | 2.52751000  | -0.71239200 | -0.54817600 |
| C  | 1.61344800  | -0.34296900 | -1.77982600 |
| O  | 2.16259500  | -0.30451500 | -2.88785900 |
| O  | 0.36149400  | -0.13666500 | -1.58282700 |
| C  | -0.44363000 | -0.96017900 | 1.74045800  |
| H  | -0.39957100 | -0.06620000 | 2.36218000  |
| H  | 2.75900100  | -1.77235700 | -0.71417200 |
| C  | 3.32447500  | -1.81482400 | 2.28234700  |
| O  | 3.60667800  | -2.72579600 | 1.59265900  |
| O  | 3.30236800  | -1.10369400 | 3.21920400  |

|   |             |             |             |
|---|-------------|-------------|-------------|
| H | -1.10893400 | -1.73608800 | 2.11300300  |
| C | 3.82817400  | 0.06539300  | -0.59607300 |
| C | 5.06700200  | -0.57922400 | -0.54039700 |
| C | 3.81143700  | 1.46603500  | -0.63669000 |
| C | 6.25727200  | 0.15014900  | -0.53183400 |
| H | 5.09693600  | -1.66203600 | -0.49152900 |
| C | 4.99520000  | 2.19931200  | -0.62673100 |
| H | 2.85942000  | 1.98407300  | -0.68657000 |
| C | 6.22646500  | 1.54288200  | -0.57443300 |
| H | 7.20786800  | -0.37106600 | -0.49092200 |
| H | 4.95887100  | 3.28298200  | -0.66210900 |
| H | 7.14963000  | 2.11173500  | -0.56829100 |

### D-TS8

Thermal Correction to Free Energy: 0.340105 Hartree

SCF energy: -1509.797767 Hartree

Gibbs free energy: -1509.457662 Hartree

Coordinates:

|   |             |             |             |
|---|-------------|-------------|-------------|
| C | -0.41117800 | 3.13320600  | -0.30581200 |
| C | -1.98401400 | 1.43561000  | -0.67015300 |
| C | -3.03570000 | 2.31007400  | -0.37082500 |
| C | -2.75242300 | 3.62223000  | -0.03460400 |
| C | -1.41852500 | 4.03964500  | -0.00309400 |
| H | -4.06065700 | 1.96946700  | -0.40691400 |
| H | -3.55242500 | 4.31547300  | 0.19567300  |
| H | -1.16272400 | 5.06124900  | 0.24889400  |
| C | -2.18773200 | 0.02643400  | -1.04364200 |
| C | -3.43321100 | -0.60322600 | -0.98262600 |
| C | -3.53501100 | -1.93775800 | -1.33736000 |
| H | -4.30601800 | -0.06664300 | -0.64010500 |
| C | -1.16468400 | -1.95240900 | -1.75713800 |
| C | -2.38629400 | -2.61950800 | -1.73127000 |
| H | -4.49106500 | -2.44536400 | -1.29349600 |
| H | -2.42758700 | -3.66629500 | -2.00537800 |
| N | -0.69004900 | 1.84985200  | -0.63758600 |
| N | -1.07068900 | -0.64339400 | -1.43719400 |
| C | 1.03900400  | 3.51979600  | -0.26533300 |
| H | 1.56750100  | 3.11021800  | -1.13008900 |
| H | 1.16341400  | 4.60304800  | -0.24458600 |
| H | 1.51297800  | 3.10053600  | 0.62655700  |
| C | 0.10558000  | -2.67343600 | -2.10761300 |
| H | -0.10118300 | -3.58551500 | -2.66952600 |
| H | 0.77827000  | -2.02374400 | -2.66665800 |
| H | 0.63282300  | -2.95246100 | -1.18908100 |

|    |             |             |             |
|----|-------------|-------------|-------------|
| Ni | 0.64738600  | 0.34494600  | -0.98069200 |
| C  | 1.55992000  | -0.49064100 | 0.85385100  |
| H  | 1.56503000  | -1.55919200 | 0.63163700  |
| C  | 2.73355200  | 0.20070600  | 0.51265800  |
| H  | 2.78858900  | 1.26529600  | 0.71402600  |
| C  | 3.72088800  | -0.38186900 | -0.45302400 |
| C  | 3.32601700  | -0.43909400 | -1.95481400 |
| O  | 4.21467000  | -0.73697600 | -2.76684500 |
| O  | 2.10263300  | -0.20646200 | -2.27191000 |
| C  | 0.44762900  | 0.02046200  | 1.54842000  |
| H  | 0.47180700  | 1.07655400  | 1.80020000  |
| H  | 3.94888700  | -1.42119900 | -0.18058800 |
| C  | 3.84769700  | -0.25288600 | 2.71376400  |
| O  | 3.28603800  | 0.54060500  | 3.37351800  |
| O  | 4.58245500  | -1.11181500 | 2.39056800  |
| H  | 4.68015100  | 0.14171500  | -0.40950500 |
| C  | -0.75846200 | -0.67240600 | 1.87782700  |
| C  | -1.87619900 | 0.05719900  | 2.36973100  |
| C  | -0.96067300 | -2.06867500 | 1.68678000  |
| C  | -3.09106400 | -0.55489900 | 2.64499500  |
| H  | -1.77210500 | 1.12833100  | 2.51363600  |
| C  | -2.17857400 | -2.66971000 | 1.95917600  |
| H  | -0.14781100 | -2.67926400 | 1.31008000  |
| C  | -3.26488600 | -1.92636200 | 2.43895000  |
| H  | -3.91852600 | 0.04672400  | 3.00965000  |
| H  | -2.29184300 | -3.73585500 | 1.78659600  |
| H  | -4.21544700 | -2.40448900 | 2.64610500  |

### D-In9

Thermal Correction to Free Energy: 0.349247 Hartree

SCF energy: -1509.825742 Hartree

Gibbs free energy: -1509.476495 Hartree

Coordinates:

|   |             |             |             |
|---|-------------|-------------|-------------|
| C | -1.73204700 | 2.78106700  | 0.22359300  |
| C | -3.40596200 | 1.16870500  | -0.03426500 |
| C | -4.40300500 | 2.14429500  | 0.00160800  |
| C | -4.03232200 | 3.47551000  | 0.14629400  |
| C | -2.68486300 | 3.79991500  | 0.25276700  |
| H | -5.44692900 | 1.87997300  | -0.08599700 |
| H | -4.78796800 | 4.25124500  | 0.17180500  |
| H | -2.36669100 | 4.82900500  | 0.36005600  |
| C | -3.68270700 | -0.27703600 | -0.22336900 |
| C | -4.96942900 | -0.78523700 | -0.39933500 |
| C | -5.12884900 | -2.14757200 | -0.61852800 |

|    |             |             |             |
|----|-------------|-------------|-------------|
| H  | -5.83255000 | -0.13593200 | -0.37605400 |
| C  | -2.73994300 | -2.40018400 | -0.48144600 |
| C  | -4.00496700 | -2.96091300 | -0.67144800 |
| H  | -6.11820400 | -2.56562800 | -0.75922800 |
| H  | -4.09564600 | -4.02272900 | -0.86097400 |
| N  | -2.10112700 | 1.49448500  | 0.08235800  |
| N  | -2.59521400 | -1.08320400 | -0.24283100 |
| C  | -0.26171000 | 3.05019100  | 0.36316500  |
| H  | 0.29348600  | 2.48885900  | -0.39105000 |
| H  | -0.03817200 | 4.11325300  | 0.27582900  |
| H  | 0.08829400  | 2.70050500  | 1.33948900  |
| C  | -1.49945200 | -3.24669500 | -0.52981300 |
| H  | -1.69350700 | -4.18826900 | -1.04433800 |
| H  | -0.68725100 | -2.72136800 | -1.03508700 |
| H  | -1.16438800 | -3.48033600 | 0.48460500  |
| Ni | -0.81925200 | -0.09885100 | 0.16768100  |
| C  | 0.53058000  | -1.10380500 | 1.38940200  |
| H  | 0.48445800  | -2.17409800 | 1.20664800  |
| C  | 1.87285400  | -0.47127300 | 1.10177500  |
| H  | 1.77642900  | 0.61599500  | 1.15456200  |
| C  | 2.39517000  | -0.87957400 | -0.29324800 |
| C  | 1.34656900  | -0.78322000 | -1.42827700 |
| O  | 1.41631300  | -1.59251500 | -2.36023800 |
| O  | 0.47521300  | 0.17164700  | -1.34916500 |
| C  | -0.45070700 | -0.50819800 | 2.16782200  |
| H  | -1.26205900 | -1.09702500 | 2.58402600  |
| H  | -0.26808100 | 0.45032600  | 2.64776300  |
| H  | 2.68525000  | -1.92899700 | -0.22795600 |
| C  | 3.62482700  | -0.07174100 | -0.66742300 |
| C  | 4.90031000  | -0.64306000 | -0.61339200 |
| C  | 3.51373000  | 1.27605000  | -1.03615200 |
| C  | 6.03517800  | 0.10626300  | -0.92507500 |
| H  | 4.99930400  | -1.67741600 | -0.30473200 |
| C  | 4.64437600  | 2.02704400  | -1.34922600 |
| H  | 2.52895800  | 1.72641000  | -1.08483600 |
| C  | 5.91179500  | 1.44457800  | -1.29580100 |
| H  | 7.01555700  | -0.35568300 | -0.87636000 |
| H  | 4.53729200  | 3.06784100  | -1.63601200 |
| H  | 6.79263900  | 2.02832500  | -1.53931700 |
| C  | 2.87230100  | -0.90734300 | 2.23168400  |
| O  | 3.09983900  | -0.05400200 | 3.12182200  |
| O  | 3.31649100  | -2.08038000 | 2.15727100  |

**D-In10**

Thermal Correction to Free Energy: 0.348661 Hartree

SCF energy: -1509.838894 Hartree

Gibbs free energy: -1509.490233 Hartree

Coordinates:

|    |             |             |             |
|----|-------------|-------------|-------------|
| C  | -0.87485600 | 3.02073500  | 0.51791800  |
| C  | -2.24077600 | 1.31842000  | -0.31801200 |
| C  | -3.38562200 | 1.94159000  | 0.18223700  |
| C  | -3.25139100 | 3.14388700  | 0.86283800  |
| C  | -1.98409100 | 3.69164600  | 1.03296300  |
| H  | -4.36254600 | 1.49789800  | 0.05625800  |
| H  | -4.12521500 | 3.64623100  | 1.25988500  |
| H  | -1.84818400 | 4.62683000  | 1.56125800  |
| C  | -2.27541800 | 0.03311700  | -1.05850400 |
| C  | -3.46157400 | -0.62610600 | -1.37918100 |
| C  | -3.40047900 | -1.80810500 | -2.10490400 |
| H  | -4.41820400 | -0.22726800 | -1.07536200 |
| C  | -1.00703000 | -1.59756500 | -2.15243900 |
| C  | -2.16307700 | -2.29303500 | -2.50770400 |
| H  | -4.30969000 | -2.33810200 | -2.36147500 |
| H  | -2.08357300 | -3.20237000 | -3.08939800 |
| N  | -1.01504200 | 1.86087100  | -0.15132500 |
| N  | -1.07298200 | -0.46759700 | -1.42489700 |
| C  | 0.52536600  | 3.52884900  | 0.70922100  |
| H  | 1.11685000  | 3.36841500  | -0.19318800 |
| H  | 0.53302100  | 4.58408200  | 0.98349600  |
| H  | 1.01485100  | 2.96249000  | 1.50874000  |
| C  | 0.35519700  | -2.08800300 | -2.55390900 |
| H  | 0.28946100  | -2.79132100 | -3.38450400 |
| H  | 0.99793200  | -1.25359100 | -2.84135800 |
| H  | 0.83757500  | -2.59819300 | -1.71656400 |
| Ni | 0.55600000  | 0.54199700  | -0.64422600 |
| C  | 1.73888500  | -0.79452000 | 0.61122500  |
| H  | 1.70998800  | -1.76649700 | 0.12665500  |
| C  | 3.12060300  | -0.20866400 | 0.71495400  |
| H  | 3.06362000  | 0.76780100  | 1.20349700  |
| C  | 3.81286000  | -0.06314000 | -0.64813300 |
| C  | 3.33303400  | 1.07703900  | -1.55895100 |
| O  | 4.13375700  | 1.54161600  | -2.37863500 |
| O  | 2.11630500  | 1.50291600  | -1.43647000 |
| C  | 0.67967900  | -0.39104900 | 1.39834400  |
| H  | 0.82747500  | 0.48574700  | 2.02611000  |
| H  | 3.70297300  | -1.00304700 | -1.19987400 |
| C  | 3.95666800  | -1.16299500 | 1.64299500  |
| O  | 4.28977200  | -0.70106200 | 2.75930100  |

|   |             |             |             |
|---|-------------|-------------|-------------|
| O | 4.19167500  | -2.30541400 | 1.17580400  |
| H | 4.88735600  | 0.08227600  | -0.51183300 |
| C | -0.57952400 | -1.11104700 | 1.63454200  |
| C | -1.61700400 | -0.46261400 | 2.32622400  |
| C | -0.82308000 | -2.41183400 | 1.15847500  |
| C | -2.85266400 | -1.07459200 | 2.51525900  |
| H | -1.45400800 | 0.54537100  | 2.69312700  |
| C | -2.05910200 | -3.01993600 | 1.33986800  |
| H | -0.04114200 | -2.94832700 | 0.63513800  |
| C | -3.08480100 | -2.35502600 | 2.01580700  |
| H | -3.63880900 | -0.54441300 | 3.04157700  |
| H | -2.22541200 | -4.01845300 | 0.95084000  |
| H | -4.04903200 | -2.83114800 | 2.15204800  |

### P-1

Thermal Correction to Free Energy: 0.148839 Hartree

SCF energy: -764.697955 Hartree

Gibbs free energy: -764.549115 Hartree

Coordinates:

|   |             |             |             |
|---|-------------|-------------|-------------|
| C | -0.67008400 | 0.07303600  | 0.31864000  |
| H | -0.59272500 | 0.20358400  | 1.39608200  |
| C | -1.72757300 | -0.54710000 | -0.20704400 |
| H | -1.80531800 | -0.65004800 | -1.28786900 |
| C | -2.88966200 | -1.09942300 | 0.56236000  |
| H | -2.80482400 | -0.86831000 | 1.62752900  |
| H | -2.90031900 | -2.19626300 | 0.46934700  |
| C | -4.28286500 | -0.62272700 | 0.03443400  |
| O | -5.15069200 | -0.37627700 | 0.90694000  |
| O | -4.41392800 | -0.56152100 | -1.21422600 |
| C | 0.68736000  | 2.17808100  | -0.14507600 |
| O | 0.66493600  | 2.50096700  | 1.06948200  |
| O | 0.87209800  | 2.92413900  | -1.13431800 |
| C | 0.47602400  | 0.65241000  | -0.47079900 |
| H | 0.25006300  | 0.58165200  | -1.53748800 |
| C | 1.75728600  | -0.12368600 | -0.20936100 |
| C | 2.32831300  | -0.91565800 | -1.21250400 |
| C | 2.38792700  | -0.08584900 | 1.04347700  |
| C | 3.49339500  | -1.64752900 | -0.97788400 |
| H | 1.85267600  | -0.96161500 | -2.18732000 |
| C | 3.54901600  | -0.81734200 | 1.28164200  |
| H | 1.96185100  | 0.54696600  | 1.81228600  |
| C | 4.10859300  | -1.60363000 | 0.27223300  |
| H | 3.91841100  | -2.25251200 | -1.77202100 |
| H | 4.02180700  | -0.77249500 | 2.25740200  |



H 5.01269600 -2.17292700 0.45832600

**D-In6-Mn**

Thermal Correction to Free Energy: 0.818336 Hartree

SCF energy: -2577.193202 Hartree

Gibbs free energy: -2576.374866 Hartree

Coordinates:

|    |             |             |             |
|----|-------------|-------------|-------------|
| C  | -2.83765200 | -3.03920200 | 0.70948500  |
| C  | -4.22166700 | -1.18324700 | 1.16986600  |
| C  | -5.30768900 | -2.04062400 | 1.43392700  |
| C  | -5.13912100 | -3.40318800 | 1.32884200  |
| C  | -3.88028100 | -3.91417000 | 0.95393400  |
| H  | -6.27469200 | -1.63034400 | 1.68908700  |
| H  | -5.96764400 | -4.07516300 | 1.51939800  |
| H  | -3.72070400 | -4.98088900 | 0.85838600  |
| C  | -4.29453300 | 0.26335100  | 1.22191300  |
| C  | -5.45290900 | 0.98352300  | 1.56203600  |
| C  | -5.42353500 | 2.36149600  | 1.56380400  |
| H  | -6.36775900 | 0.46031200  | 1.80303100  |
| C  | -3.12170600 | 2.27813800  | 0.86006300  |
| C  | -4.23257000 | 3.02305600  | 1.21097300  |
| H  | -6.31066600 | 2.92827000  | 1.81991300  |
| H  | -4.18049000 | 4.10463000  | 1.19737700  |
| N  | -2.99312600 | -1.69522200 | 0.83052700  |
| N  | -3.13597300 | 0.92041600  | 0.88154900  |
| C  | -1.47196100 | -3.52037900 | 0.30427300  |
| H  | -0.74239100 | -3.31634900 | 1.09145400  |
| H  | -1.46948900 | -4.59148900 | 0.10077500  |
| H  | -1.13200600 | -2.98867100 | -0.58920500 |
| C  | -1.84271400 | 2.91634900  | 0.40212400  |
| H  | -1.85054400 | 3.99566500  | 0.55654300  |
| H  | -0.99134100 | 2.47686300  | 0.92419700  |
| H  | -1.68745700 | 2.71293500  | -0.66177000 |
| Ni | -1.82930600 | -0.31277100 | 0.02856700  |
| C  | -3.52604300 | -0.03204300 | -2.07240600 |
| H  | -3.58603500 | 1.05160600  | -2.17210400 |
| C  | -2.20250500 | -0.56273400 | -2.03577700 |
| H  | -2.13626600 | -1.64506600 | -2.16895200 |
| C  | -1.04895800 | 0.19233300  | -2.68109100 |
| H  | -1.33292700 | 1.24135900  | -2.83852400 |
| H  | -0.75290700 | -0.20412000 | -3.65778200 |
| C  | 0.17937000  | 0.24566600  | -1.78318500 |
| O  | 1.33607900  | 0.17396800  | -2.29226800 |
| O  | -0.00286200 | 0.39340900  | -0.53503200 |

|    |             |             |             |
|----|-------------|-------------|-------------|
| C  | -4.69133600 | -0.72679600 | -1.87051200 |
| H  | -4.61527700 | -1.80685600 | -1.76246700 |
| C  | -6.02225000 | -0.17992600 | -1.71904000 |
| C  | -7.11776000 | -1.05609800 | -1.52538000 |
| C  | -6.31653400 | 1.20493800  | -1.72522800 |
| C  | -8.41523900 | -0.58395200 | -1.36087000 |
| H  | -6.93003200 | -2.12495600 | -1.49786300 |
| C  | -7.61528600 | 1.67220400  | -1.57146900 |
| H  | -5.51207900 | 1.92328300  | -1.83160400 |
| C  | -8.68250400 | 0.78710800  | -1.38876100 |
| H  | -9.22563100 | -1.29090900 | -1.21186100 |
| H  | -7.79774100 | 2.74240900  | -1.57954100 |
| H  | -9.69369700 | 1.15749700  | -1.26390900 |
| Mn | 2.93241300  | 0.04741500  | -0.92500000 |
| N  | 2.73699300  | 3.80040200  | -0.75627600 |
| C  | 2.68583400  | 5.06628000  | -0.02215900 |
| H  | 1.69342700  | 5.17206800  | 0.41771900  |
| H  | 3.41580200  | 5.09033700  | 0.78239500  |
| H  | 2.85980600  | 5.91088200  | -0.69467400 |
| C  | 1.50899200  | 3.43090400  | -1.46470400 |
| H  | 1.73298400  | 2.69095100  | -2.22689100 |
| H  | 0.78381300  | 3.00409500  | -0.76932700 |
| H  | 1.08368300  | 4.32336900  | -1.92590900 |
| C  | 3.83124700  | 3.03466100  | -0.84796300 |
| C  | 5.10161900  | 3.48223200  | -0.16704700 |
| H  | 5.36374000  | 4.51120600  | -0.41858800 |
| H  | 4.99112000  | 3.41557100  | 0.91857600  |
| H  | 5.90276900  | 2.81616600  | -0.47653500 |
| O  | 3.82294600  | 1.95156300  | -1.48410400 |
| N  | 6.50004300  | -2.06987100 | -2.23671400 |
| C  | 7.94216100  | -2.27336700 | -2.10481800 |
| H  | 8.40270900  | -2.22179400 | -3.09419200 |
| H  | 8.39823300  | -1.51779300 | -1.47417000 |
| H  | 8.14090700  | -3.26021700 | -1.67838300 |
| C  | 5.84339400  | -2.94948300 | -3.20619900 |
| H  | 4.76697400  | -2.82747500 | -3.14230100 |
| H  | 6.17984400  | -2.70442300 | -4.21708600 |
| H  | 6.11039300  | -3.98576200 | -2.98748900 |
| C  | 5.79791000  | -1.15565600 | -1.55664300 |
| C  | 6.49333700  | -0.28499400 | -0.53804500 |
| H  | 7.02647000  | -0.88690600 | 0.20000900  |
| H  | 7.21403200  | 0.37697400  | -1.02335600 |
| H  | 5.74340700  | 0.31675700  | -0.03294000 |
| O  | 4.56450600  | -1.02832200 | -1.76033500 |

|   |             |             |             |
|---|-------------|-------------|-------------|
| N | 2.65495900  | 1.52712500  | 2.87530600  |
| C | 2.67908000  | 1.91465500  | 4.28666100  |
| H | 1.83217500  | 1.46392600  | 4.81003000  |
| H | 3.59822000  | 1.60386800  | 4.77142700  |
| H | 2.59863500  | 3.00151000  | 4.36032900  |
| C | 1.53023100  | 2.06464700  | 2.10584700  |
| H | 1.73252800  | 3.09657700  | 1.81095000  |
| H | 1.34270800  | 1.46289200  | 1.22212600  |
| H | 0.64034800  | 2.04821500  | 2.73595400  |
| C | 3.61236000  | 0.81244200  | 2.27160500  |
| C | 4.76131500  | 0.25905200  | 3.08121900  |
| H | 5.39510900  | 1.06552900  | 3.45737100  |
| H | 4.41179200  | -0.32465900 | 3.93417700  |
| H | 5.35530900  | -0.37711500 | 2.43011300  |
| O | 3.58450900  | 0.59336800  | 1.03930000  |
| N | 2.03248500  | -2.18152100 | 2.22956600  |
| C | 2.44464900  | -2.86914800 | 3.45268600  |
| C | 0.83605800  | -1.34744500 | 2.36484100  |
| C | 2.62628700  | -2.33661900 | 1.03732000  |
| H | 1.73305400  | -3.66240000 | 3.69812500  |
| H | 3.43695600  | -3.29792800 | 3.35665300  |
| H | 2.45887900  | -2.15002900 | 4.27421800  |
| H | 0.58962800  | -0.89807900 | 1.40822400  |
| H | -0.00186700 | -1.95485700 | 2.71385600  |
| H | 1.02338400  | -0.56474000 | 3.10187500  |
| C | 3.85605000  | -3.20721300 | 0.92325100  |
| O | 2.18526000  | -1.75862700 | 0.01513300  |
| H | 3.65453600  | -4.23251300 | 1.23960200  |
| H | 4.16746500  | -3.20430100 | -0.11798500 |
| H | 4.67063500  | -2.81718700 | 1.53792400  |

### Int-H

Thermal Correction to Free Energy: 0.259460 Hartree

SCF energy: -1090.030939 Hartree

Gibbs free energy: -1089.771478 Hartree

Coordinates:

|   |            |             |             |
|---|------------|-------------|-------------|
| C | 1.74674200 | -2.25425500 | -0.52831400 |
| C | 2.12310500 | 0.06448400  | -0.22723200 |
| C | 3.49127100 | -0.18601800 | 0.02331100  |
| C | 3.96923100 | -1.47493800 | -0.00788100 |
| C | 3.07585600 | -2.53774500 | -0.28873900 |
| H | 4.15967000 | 0.63536900  | 0.24684800  |
| H | 5.01660300 | -1.67740500 | 0.18384300  |
| H | 3.42416200 | -3.56244400 | -0.32371300 |

|    |             |             |             |
|----|-------------|-------------|-------------|
| C  | 1.51401200  | 1.36729600  | -0.22762100 |
| C  | 2.21051100  | 2.57544500  | 0.00135400  |
| C  | 1.53421300  | 3.77215200  | -0.03466300 |
| H  | 3.27366500  | 2.55789200  | 0.20283000  |
| C  | -0.50483400 | 2.56902500  | -0.50133100 |
| C  | 0.14377900  | 3.77175000  | -0.29205900 |
| H  | 2.05930200  | 4.70538300  | 0.13383500  |
| H  | -0.41549600 | 4.69838100  | -0.32643000 |
| N  | 1.26796700  | -0.98190500 | -0.51317300 |
| N  | 0.15742700  | 1.38375600  | -0.48787000 |
| C  | 0.73669600  | -3.32588500 | -0.82929200 |
| H  | 0.22567500  | -3.10742200 | -1.77244200 |
| H  | 1.19854300  | -4.31147000 | -0.89550700 |
| H  | -0.03239800 | -3.34685200 | -0.05106200 |
| C  | -1.98812800 | 2.50113000  | -0.73352600 |
| H  | -2.40159000 | 3.48470800  | -0.96022800 |
| H  | -2.21962100 | 1.80485100  | -1.54156900 |
| H  | -2.48676300 | 2.11199300  | 0.15942800  |
| Ni | -0.64358900 | -0.46078000 | -0.46956500 |
| C  | -0.72821100 | -0.01717300 | 2.32121800  |
| C  | -1.41008800 | -0.90575900 | 1.40024500  |
| H  | -1.14489000 | -1.95872600 | 1.55409700  |
| C  | -2.91121600 | -0.71786300 | 1.20087600  |
| C  | -3.38993800 | -0.91569000 | -0.25032400 |
| O  | -4.57302100 | -1.17996100 | -0.48409700 |
| O  | -2.48839300 | -0.74360300 | -1.16857800 |
| H  | -3.19025300 | 0.31376900  | 1.45467400  |
| C  | 0.38871000  | -0.25341300 | 3.04555800  |
| H  | 0.87639600  | -1.22479400 | 3.02987500  |
| H  | -3.53114400 | -1.35710000 | 1.84303500  |
| H  | 0.85794900  | 0.52455500  | 3.63747200  |
| H  | -1.14601300 | 0.99146200  | 2.37203900  |

### TS1-H

Thermal Correction to Free Energy: 0.264531 Hartree

SCF energy: -1278.673795 Hartree

Gibbs free energy: -1278.409264 Hartree

Coordinates:

|   |             |            |             |
|---|-------------|------------|-------------|
| C | -1.44524800 | 1.40760200 | -2.17181100 |
| C | -2.25091700 | 0.09732900 | -0.37867500 |
| C | -3.42392300 | 0.87564700 | -0.32172100 |
| C | -3.58973100 | 1.92443100 | -1.19885500 |
| C | -2.57660900 | 2.19991500 | -2.14176000 |
| H | -4.18675000 | 0.65589100 | 0.41317600  |

|    |             |             |             |
|----|-------------|-------------|-------------|
| H  | -4.48548900 | 2.53322400  | -1.16450900 |
| H  | -2.68068900 | 3.01682900  | -2.84468800 |
| C  | -1.96816500 | -1.02472800 | 0.48938000  |
| C  | -2.83751700 | -1.49319800 | 1.49394700  |
| C  | -2.47116900 | -2.57763400 | 2.26066300  |
| H  | -3.78752700 | -1.00398700 | 1.66323000  |
| C  | -0.39425600 | -2.69647900 | 1.04085300  |
| C  | -1.22247400 | -3.19144300 | 2.03108000  |
| H  | -3.13217200 | -2.95281700 | 3.03308900  |
| H  | -0.90613200 | -4.04313600 | 2.62023600  |
| N  | -1.28136600 | 0.36398400  | -1.31616200 |
| N  | -0.76092000 | -1.64312500 | 0.26487900  |
| C  | -0.33047000 | 1.63704800  | -3.15305900 |
| H  | -0.13833600 | 0.72300500  | -3.72379200 |
| H  | -0.56211200 | 2.44634800  | -3.84566900 |
| H  | 0.59587500  | 1.87965200  | -2.62361900 |
| C  | 0.96647900  | -3.27385200 | 0.77536900  |
| H  | 1.11240700  | -4.21487900 | 1.30655900  |
| H  | 1.11731200  | -3.42481700 | -0.29552500 |
| H  | 1.73862600  | -2.56745400 | 1.09563500  |
| Ni | 0.40705100  | -0.61896600 | -0.99554500 |
| C  | 0.99142500  | 0.75729900  | 1.25836800  |
| C  | 1.69813400  | 0.71472100  | 0.03628600  |
| H  | 1.61293600  | 1.61387400  | -0.57821700 |
| C  | 3.03754700  | 0.00814300  | -0.06695900 |
| C  | 3.17035900  | -0.95640200 | -1.26370800 |
| O  | 4.28665700  | -1.27948200 | -1.67486500 |
| O  | 2.05491500  | -1.41228800 | -1.74819100 |
| H  | 3.19981100  | -0.61166500 | 0.82436400  |
| C  | 1.44713100  | 3.18150800  | 2.62061700  |
| O  | 1.27451100  | 3.00634300  | 3.77957000  |
| O  | 1.92966800  | 3.71936600  | 1.68266400  |
| C  | 0.01594500  | 1.65810600  | 1.64672300  |
| H  | -0.39059600 | 2.35640900  | 0.92176900  |
| H  | 3.88535200  | 0.70199400  | -0.10661300 |
| H  | -0.60256100 | 1.44256300  | 2.50917100  |
| H  | 1.24335000  | -0.02558200 | 1.97578300  |

### TS2-H

Thermal Correction to Free Energy: 0.264749 Hartree

SCF energy: -1278.662064 Hartree

Gibbs free energy: -1278.397315 Hartree

Coordinates:

|   |             |            |             |
|---|-------------|------------|-------------|
| C | -1.39033400 | 2.67038800 | -0.38030600 |
|---|-------------|------------|-------------|

|    |             |             |             |
|----|-------------|-------------|-------------|
| C  | -2.76603800 | 0.81161400  | 0.12845300  |
| C  | -3.87018200 | 1.67168200  | 0.31239000  |
| C  | -3.71959700 | 3.02770600  | 0.13107400  |
| C  | -2.45230700 | 3.54065800  | -0.23042500 |
| H  | -4.83244700 | 1.26611300  | 0.59611700  |
| H  | -4.56204400 | 3.69603100  | 0.26521500  |
| H  | -2.30744600 | 4.60145600  | -0.39145200 |
| C  | -2.81295400 | -0.62170100 | 0.27829500  |
| C  | -3.97876800 | -1.35650600 | 0.58578100  |
| C  | -3.91319500 | -2.72752000 | 0.69085300  |
| H  | -4.92123800 | -0.84526700 | 0.73047800  |
| C  | -1.55082100 | -2.62273500 | 0.22034700  |
| C  | -2.67563800 | -3.37885100 | 0.50120700  |
| H  | -4.80385600 | -3.30216400 | 0.91732200  |
| H  | -2.59574100 | -4.45579400 | 0.57764200  |
| N  | -1.53237900 | 1.32970600  | -0.21355400 |
| N  | -1.61183800 | -1.27413000 | 0.09760500  |
| C  | -0.00920400 | 3.14143900  | -0.74072800 |
| H  | 0.35968000  | 2.59797900  | -1.61580500 |
| H  | 0.01138400  | 4.21091000  | -0.95122500 |
| H  | 0.68649600  | 2.93065500  | 0.07661500  |
| C  | -0.19132000 | -3.24522200 | 0.05991200  |
| H  | -0.25982700 | -4.32774700 | -0.05378100 |
| H  | 0.32688900  | -2.81346600 | -0.79886900 |
| H  | 0.42116200  | -3.02925900 | 0.94161800  |
| Ni | -0.06358000 | -0.02280500 | -0.15347000 |
| C  | 2.06556500  | -0.25149600 | 0.94592600  |
| C  | 2.92230800  | 0.40492800  | 0.07951600  |
| H  | 2.81971800  | 1.48562600  | -0.00759100 |
| C  | 3.38427800  | -0.32841100 | -1.14230300 |
| C  | 2.26727900  | -0.61682100 | -2.19223200 |
| O  | 2.62450500  | -0.81379800 | -3.36185400 |
| O  | 1.04644400  | -0.67613600 | -1.78766600 |
| C  | 0.98257900  | 0.28182800  | 1.68303900  |
| H  | 0.94639300  | 1.35824800  | 1.84679300  |
| H  | 3.78232200  | -1.31360800 | -0.86320100 |
| C  | 4.82187500  | 0.41238200  | 1.62233300  |
| O  | 4.57631600  | 1.38335900  | 2.23992100  |
| O  | 5.39472400  | -0.54680600 | 1.25279100  |
| H  | 4.18962200  | 0.18803100  | -1.67046300 |
| H  | 0.55690900  | -0.31148200 | 2.48800900  |
| H  | 2.15470200  | -1.33990500 | 0.95704300  |

**Int-Me**

Thermal Correction to Free Energy: 0.288011 Hartree

SCF energy: -1129.359625 Hartree

Gibbs free energy: -1129.071614 Hartree

Coordinates:

|    |             |             |             |
|----|-------------|-------------|-------------|
| C  | 1.64875700  | -2.31027600 | -0.69719900 |
| C  | 2.18276100  | -0.05948300 | -0.18488200 |
| C  | 3.50681900  | -0.44013500 | 0.12876800  |
| C  | 3.88364900  | -1.75856500 | 0.02751100  |
| C  | 2.93545300  | -2.71665900 | -0.40794500 |
| H  | 4.22294600  | 0.30605400  | 0.44776100  |
| H  | 4.89660000  | -2.06103300 | 0.26650600  |
| H  | 3.21298500  | -3.75622900 | -0.52966000 |
| C  | 1.69353900  | 1.29259600  | -0.16763100 |
| C  | 2.47294600  | 2.42183500  | 0.16966100  |
| C  | 1.91563900  | 3.67784100  | 0.11591600  |
| H  | 3.50633200  | 2.29801000  | 0.46620500  |
| C  | -0.17244900 | 2.68673500  | -0.57708600 |
| C  | 0.56426000  | 3.81724400  | -0.27476400 |
| H  | 2.50598500  | 4.55187400  | 0.36608300  |
| H  | 0.10186600  | 4.79433400  | -0.33926100 |
| N  | 1.25899100  | -1.01232000 | -0.57403700 |
| N  | 0.36975900  | 1.44327700  | -0.53283100 |
| C  | 0.60573500  | -3.26505000 | -1.20799900 |
| H  | 1.00513800  | -4.27348000 | -1.32127300 |
| H  | -0.25081100 | -3.30235100 | -0.53177900 |
| H  | 0.23090500  | -2.92113500 | -2.17752100 |
| C  | -1.62498900 | 2.77229900  | -0.95580400 |
| H  | -1.89147700 | 3.77893700  | -1.28104400 |
| H  | -1.86006700 | 2.05323400  | -1.74221500 |
| H  | -2.25299400 | 2.51277700  | -0.09858200 |
| Ni | -0.60347400 | -0.32215800 | -0.55097500 |
| C  | -0.77876100 | 0.28641300  | 2.19801400  |
| C  | -1.49896900 | -0.61176000 | 1.31077100  |
| C  | -2.94099100 | -0.20495500 | 1.00317500  |
| C  | -3.38349600 | -0.51430200 | -0.43766600 |
| O  | -4.56987000 | -0.73348200 | -0.69808300 |
| O  | -2.43652500 | -0.47862500 | -1.32522200 |
| H  | -3.05662500 | 0.87977600  | 1.11730600  |
| C  | 0.18029000  | -0.00386800 | 3.10651700  |
| H  | 0.49947800  | -1.02195900 | 3.30382900  |
| H  | -3.67093700 | -0.66079000 | 1.68824900  |
| H  | 0.69404600  | 0.78220100  | 3.64941100  |
| H  | -1.02347300 | 1.34114100  | 2.06297400  |
| C  | -1.39219000 | -2.09368700 | 1.64974600  |

|   |             |             |            |
|---|-------------|-------------|------------|
| H | -0.35444400 | -2.43866700 | 1.66459800 |
| H | -1.82493300 | -2.31839000 | 2.63981200 |
| H | -1.93133100 | -2.70105400 | 0.91579100 |

**TS1-Me**

Thermal Correction to Free Energy: 0.294052 Hartree

SCF energy: -1318.001864 Hartree

Gibbs free energy: -1317.707812 Hartree

Coordinates:

|    |             |             |             |
|----|-------------|-------------|-------------|
| C  | 1.91004400  | -2.15046600 | -1.17352500 |
| C  | 2.32937500  | -0.14759800 | 0.00786100  |
| C  | 3.46244000  | -0.72736200 | 0.61201800  |
| C  | 3.80041200  | -2.02992100 | 0.32028700  |
| C  | 3.01359200  | -2.75328800 | -0.60164200 |
| H  | 4.06269100  | -0.15226800 | 1.30432500  |
| H  | 4.66636100  | -2.49024300 | 0.78114500  |
| H  | 3.27516400  | -3.76709500 | -0.87768000 |
| C  | 1.91338700  | 1.22484200  | 0.19957600  |
| C  | 2.58599600  | 2.15237600  | 1.01871700  |
| C  | 2.12297600  | 3.44701400  | 1.10406000  |
| H  | 3.46164100  | 1.85039600  | 1.57752500  |
| C  | 0.33606300  | 2.87157200  | -0.40975700 |
| C  | 0.97807300  | 3.81683700  | 0.36955300  |
| H  | 2.63315000  | 4.17307100  | 1.72610400  |
| H  | 0.59630900  | 4.82942000  | 0.40924900  |
| N  | 1.55141800  | -0.87469000 | -0.86366700 |
| N  | 0.79353500  | 1.59635400  | -0.50601400 |
| C  | 1.06948700  | -2.84682600 | -2.20722400 |
| H  | 1.46630600  | -3.83392600 | -2.44595200 |
| H  | 0.03922800  | -2.95899300 | -1.86460800 |
| H  | 1.03733900  | -2.24640400 | -3.12210200 |
| C  | -0.91599100 | 3.19384800  | -1.17545600 |
| H  | -1.04106200 | 4.27046500  | -1.29742900 |
| H  | -0.90466500 | 2.70743700  | -2.15238700 |
| H  | -1.79096700 | 2.80559200  | -0.64518600 |
| Ni | -0.19117500 | -0.00089800 | -1.23470900 |
| C  | -1.04206600 | -0.01540700 | 1.30128100  |
| C  | -1.65283700 | -0.65958200 | 0.19990900  |
| C  | -2.90688500 | -0.03517200 | -0.39513600 |
| C  | -2.89888500 | 0.06455200  | -1.93261500 |
| O  | -3.95739600 | 0.05288800  | -2.56422700 |
| O  | -1.72661300 | 0.20426800  | -2.47308900 |
| H  | -3.02432400 | 0.99272600  | -0.03208100 |
| C  | -1.87430400 | -0.89207100 | 3.80206800  |



|   |             |             |             |
|---|-------------|-------------|-------------|
| O | -1.94172000 | 0.14266100  | 4.37490400  |
| O | -2.18640000 | -2.01485000 | 3.58828300  |
| C | -0.19361900 | -0.53702800 | 2.26505500  |
| H | 0.17973500  | -1.55085700 | 2.18243700  |
| H | -3.81765400 | -0.57117800 | -0.09723500 |
| H | 0.38931500  | 0.14088200  | 2.87645100  |
| H | -1.26773900 | 1.04629800  | 1.39525500  |
| C | -1.64997300 | -2.17816300 | 0.14483400  |
| H | -0.66310800 | -2.59417400 | 0.36039600  |
| H | -2.35168600 | -2.59916800 | 0.87800700  |
| H | -1.95518900 | -2.53173200 | -0.84460800 |

### TS2-Me

Thermal Correction to Free Energy: 0.291628 Hartree

SCF energy: -1317.994770 Hartree

Gibbs free energy: -1317.703142 Hartree

Coordinates:

|    |             |             |             |
|----|-------------|-------------|-------------|
| C  | 2.02039000  | 2.57060300  | 0.21798000  |
| C  | 2.98490100  | 0.46304100  | -0.26738800 |
| C  | 4.18929100  | 1.09678800  | -0.64522200 |
| C  | 4.29594600  | 2.46658400  | -0.57273500 |
| C  | 3.18891400  | 3.22301600  | -0.12294700 |
| H  | 5.02703400  | 0.50669200  | -0.99261400 |
| H  | 5.21748500  | 2.96110400  | -0.85679200 |
| H  | 3.24757800  | 4.30112600  | -0.04259800 |
| C  | 2.77570300  | -0.96222100 | -0.28256200 |
| C  | 3.77128400  | -1.90456000 | -0.62348800 |
| C  | 3.48752000  | -3.24947200 | -0.56731500 |
| H  | 4.75776000  | -1.57033600 | -0.91596800 |
| C  | 1.23841400  | -2.71336900 | 0.12285700  |
| C  | 2.19778300  | -3.66635000 | -0.17632100 |
| H  | 4.24770900  | -3.98109200 | -0.81572500 |
| H  | 1.94830000  | -4.71797100 | -0.11182500 |
| N  | 1.90687900  | 1.21796500  | 0.15290200  |
| N  | 1.51109300  | -1.38532200 | 0.07994300  |
| C  | 0.79796000  | 3.31073700  | 0.68140300  |
| H  | 0.42634600  | 2.88275500  | 1.61703600  |
| H  | 1.00048800  | 4.37158000  | 0.83066500  |
| H  | -0.00512600 | 3.20703900  | -0.05491500 |
| C  | -0.16594100 | -3.11204300 | 0.48722000  |
| H  | -0.19384800 | -4.12621100 | 0.88875900  |
| H  | -0.58979200 | -2.41456300 | 1.21043400  |
| H  | -0.80364100 | -3.08626200 | -0.40186700 |
| Ni | 0.22002000  | 0.15906400  | 0.28804600  |

|   |             |             |             |
|---|-------------|-------------|-------------|
| C | -1.92378400 | -0.16304300 | -0.93409400 |
| C | -2.89325000 | 0.44828700  | -0.16099700 |
| C | -3.32901800 | -0.30493800 | 1.06348500  |
| C | -2.28758500 | -0.19223600 | 2.21948800  |
| O | -2.70943100 | -0.15894100 | 3.38290100  |
| O | -1.03834800 | -0.16126400 | 1.90287500  |
| C | -0.80206200 | 0.43853500  | -1.56443200 |
| H | -0.82109000 | 1.51110400  | -1.74960300 |
| H | -3.43238700 | -1.37384000 | 0.84118800  |
| C | -4.64007500 | -0.11257300 | -1.83766500 |
| O | -4.65176500 | 0.89617400  | -2.44135500 |
| O | -4.92333500 | -1.19845700 | -1.48618800 |
| H | -4.28648200 | 0.03879100  | 1.46512900  |
| H | -0.27430300 | -0.12834000 | -2.32889400 |
| H | -1.93013200 | -1.25196500 | -0.91873400 |
| C | -2.93882600 | 1.95043400  | -0.06021200 |
| H | -2.87502100 | 2.42163800  | -1.04426600 |
| H | -3.86643600 | 2.28675700  | 0.41353200  |
| H | -2.10315300 | 2.33628700  | 0.54364900  |

### S-d2'

Thermal Correction to Free Energy: 0.461794 Hartree

SCF energy: -1631.536654 Hartree

Gibbs free energy: -1631.074860 Hartree

Coordinates:

|    |             |             |             |
|----|-------------|-------------|-------------|
| C  | -1.54802900 | -3.10362700 | -0.45519700 |
| C  | -1.45091000 | -0.80098700 | -0.36203000 |
| C  | -2.79924600 | -0.69067200 | 0.04451200  |
| C  | -3.55064900 | -1.89605700 | 0.17695900  |
| C  | -2.88986500 | -3.09340900 | -0.06084000 |
| H  | -3.41854300 | -4.03394300 | 0.02728100  |
| C  | -0.63532000 | 0.37012300  | -0.53550600 |
| C  | -1.16891000 | 1.64502400  | -0.25496800 |
| C  | -0.31274100 | 2.76786300  | -0.44990800 |
| C  | 1.40717800  | 1.21994600  | -1.22616300 |
| C  | 0.95125000  | 2.52515500  | -0.95699100 |
| H  | 1.62603600  | 3.35413600  | -1.12922200 |
| N  | -0.83924600 | -1.98994600 | -0.61825300 |
| N  | 0.63427900  | 0.15537000  | -0.98766100 |
| C  | 2.78379500  | 0.98558300  | -1.76475500 |
| H  | 3.43740600  | 0.59835700  | -0.97850900 |
| H  | 2.75377100  | 0.22061700  | -2.54183200 |
| H  | 3.21659200  | 1.90404300  | -2.16207100 |
| Ni | 1.04277200  | -1.82124100 | -1.12323900 |

|   |             |             |             |
|---|-------------|-------------|-------------|
| C | 3.75818200  | -2.18530000 | -0.44039800 |
| H | 3.44314100  | -2.53792800 | 0.54092800  |
| C | 2.85710000  | -2.51992200 | -1.52193200 |
| H | 3.21353000  | -2.28040400 | -2.52529200 |
| C | 1.83386800  | -3.53374400 | -1.36446900 |
| H | 1.85687100  | -4.16420300 | -0.47106000 |
| H | 1.51256900  | -4.08074500 | -2.25291100 |
| C | 4.90766700  | -1.47219800 | -0.53895600 |
| H | 5.22139200  | -1.15264700 | -1.53130200 |
| C | 5.78659600  | -1.06427900 | 0.55333900  |
| C | 6.99756400  | -0.40514100 | 0.25597000  |
| C | 5.49369000  | -1.28340300 | 1.91717400  |
| C | 7.87218600  | 0.00336000  | 1.25887100  |
| H | 7.24998300  | -0.21589500 | -0.78289500 |
| C | 6.36932500  | -0.87767500 | 2.91736300  |
| H | 4.56685900  | -1.77031600 | 2.19796700  |
| C | 7.56715300  | -0.23126700 | 2.59964200  |
| H | 8.79536600  | 0.50707600  | 0.99209300  |
| H | 6.11391100  | -1.06137700 | 3.95582500  |
| H | 8.24555300  | 0.08606400  | 3.38328100  |
| H | -1.02947800 | -4.03128600 | -0.66018600 |
| C | -0.72594200 | 4.15866300  | -0.13683200 |
| C | -1.19465600 | 4.50200900  | 1.13951600  |
| C | -0.60684200 | 5.16243200  | -1.10764600 |
| C | -1.53806500 | 5.81857700  | 1.43489400  |
| H | -1.27071500 | 3.73936300  | 1.90576900  |
| C | -0.95951500 | 6.47702600  | -0.81257300 |
| H | -0.25027100 | 4.90629300  | -2.09875700 |
| C | -1.42550700 | 6.80875900  | 0.45907300  |
| H | -1.88967600 | 6.07113500  | 2.42857400  |
| H | -0.87150400 | 7.24104000  | -1.57637500 |
| H | -1.69746700 | 7.83241300  | 0.68912700  |
| C | -4.98782400 | -1.90952800 | 0.54630600  |
| C | -5.43024500 | -2.70049200 | 1.61551800  |
| C | -5.93008100 | -1.17556500 | -0.18872700 |
| C | -6.78134100 | -2.74603100 | 1.94993700  |
| H | -4.70970400 | -3.26803200 | 2.19322900  |
| C | -7.28142200 | -1.22942200 | 0.14199900  |
| H | -5.60437300 | -0.57811700 | -1.03216100 |
| C | -7.71048200 | -2.01109100 | 1.21447600  |
| H | -7.10738700 | -3.35441900 | 2.78564300  |
| H | -7.99921600 | -0.66411700 | -0.44108700 |
| H | -8.76222600 | -2.04885900 | 1.47358300  |
| C | -2.53418400 | 1.72988600  | 0.17503600  |

|   |             |            |            |
|---|-------------|------------|------------|
| C | -3.31003900 | 0.62035000 | 0.32111000 |
| H | -2.95572800 | 2.70407600 | 0.38140400 |
| H | -4.33196300 | 0.72475600 | 0.65820900 |

### T-TS3'

Thermal Correction to Free Energy: 0.466050 Hartree

SCF energy: -1820.160566 Hartree

Gibbs free energy: -1819.694517 Hartree

Coordinates:

|    |             |             |             |
|----|-------------|-------------|-------------|
| C  | 0.14916000  | -2.79891400 | -0.33071300 |
| C  | -0.70050500 | -0.65419200 | -0.32413300 |
| C  | -2.03243000 | -1.11250100 | -0.46062100 |
| C  | -2.24192600 | -2.51514400 | -0.56493500 |
| C  | -1.12590800 | -3.34273900 | -0.48413200 |
| H  | -1.23671400 | -4.41673500 | -0.55833800 |
| C  | -0.41659700 | 0.75171700  | -0.25303600 |
| C  | -1.47009600 | 1.69177300  | -0.24161800 |
| C  | -1.11941600 | 3.06752200  | -0.15222500 |
| C  | 1.22351200  | 2.40042500  | -0.16915900 |
| C  | 0.23363800  | 3.39005300  | -0.13939300 |
| H  | 0.53604700  | 4.42748000  | -0.07466800 |
| N  | 0.37159500  | -1.49065600 | -0.26007300 |
| N  | 0.89849400  | 1.10190700  | -0.21241000 |
| C  | 2.68478800  | 2.73384300  | -0.12035700 |
| H  | 3.10640900  | 2.41365600  | 0.83783700  |
| H  | 3.22342500  | 2.18829000  | -0.89972200 |
| H  | 2.86131300  | 3.80232700  | -0.23990400 |
| Ni | 2.10311700  | -0.46136200 | 0.00901400  |
| C  | 2.48690900  | -2.11423400 | 2.27282400  |
| H  | 2.15977100  | -3.04251200 | 1.80940100  |
| C  | 3.34709900  | -1.29617800 | 1.50517700  |
| H  | 3.77001700  | -0.43205800 | 2.01499300  |
| C  | 3.80695100  | -1.62233500 | 0.19243400  |
| H  | 3.56951800  | -2.61608400 | -0.18383400 |
| C  | 0.03241100  | -1.00698500 | 2.93930000  |
| O  | -0.69376000 | -1.95193800 | 2.86379700  |
| O  | 0.19338200  | 0.17151600  | 2.83121800  |
| C  | 1.95378300  | -1.79780600 | 3.51930700  |
| H  | 1.52842400  | -2.59031200 | 4.12302700  |
| H  | 2.35460600  | -0.94606700 | 4.06088300  |
| C  | 4.87244000  | -0.92724100 | -0.52426400 |
| C  | 5.31726700  | -1.43316400 | -1.76762600 |
| C  | 5.48579500  | 0.25913600  | -0.05696400 |
| C  | 6.30327200  | -0.78904700 | -2.50351100 |

|   |             |             |             |
|---|-------------|-------------|-------------|
| H | 4.86830800  | -2.34359500 | -2.15239000 |
| C | 6.47013600  | 0.90156300  | -0.79904200 |
| H | 5.18150100  | 0.68697100  | 0.89057900  |
| C | 6.88857600  | 0.38903800  | -2.02925500 |
| H | 6.61951800  | -1.20666500 | -3.45369000 |
| H | 6.91709800  | 1.81157200  | -0.41245900 |
| H | 7.65689900  | 0.89316400  | -2.60377300 |
| H | 1.02044900  | -3.43944300 | -0.27061100 |
| C | -2.12848700 | 4.15087800  | -0.06318300 |
| C | -2.07062600 | 5.24216400  | -0.94145200 |
| C | -3.12202600 | 4.13141400  | 0.92697200  |
| C | -2.99260900 | 6.28103500  | -0.84141000 |
| H | -1.30907200 | 5.26558600  | -1.71257600 |
| C | -4.03785900 | 5.17492500  | 1.03018700  |
| H | -3.16141400 | 3.30697300  | 1.62924000  |
| C | -3.97885000 | 6.25051300  | 0.14415500  |
| H | -2.94128400 | 7.11315100  | -1.53417400 |
| H | -4.79401500 | 5.15001700  | 1.80639500  |
| H | -4.69458000 | 7.06059900  | 0.22330500  |
| C | -3.58633400 | -3.11403900 | -0.75033900 |
| C | -4.03157800 | -4.11689700 | 0.12198900  |
| C | -4.41302700 | -2.72561700 | -1.81459700 |
| C | -5.27987000 | -4.70757300 | -0.05779300 |
| H | -3.40215300 | -4.41950400 | 0.95106900  |
| C | -5.65706500 | -3.32352500 | -1.99727500 |
| H | -4.07126600 | -1.96788700 | -2.51000500 |
| C | -6.09584900 | -4.31294800 | -1.11759500 |
| H | -5.61526200 | -5.47441500 | 0.63093100  |
| H | -6.28145900 | -3.01923700 | -2.82940100 |
| H | -7.06627600 | -4.77464900 | -1.25857000 |
| C | -2.81315700 | 1.19713000  | -0.34716800 |
| C | -3.08094600 | -0.13325400 | -0.45232200 |
| H | -3.63087700 | 1.90466800  | -0.35301200 |
| H | -4.10724500 | -0.46530600 | -0.52501000 |

### T-TS4'

Thermal Correction to Free Energy: 0.469769 Hartree

SCF energy: -1820.161610 Hartree

Gibbs free energy: -1819.691841 Hartree

Coordinates:

|   |             |             |             |
|---|-------------|-------------|-------------|
| C | -2.20963100 | -0.40758900 | -2.20625800 |
| C | -0.19097100 | 0.31507800  | -1.35280600 |
| C | -0.71299400 | 1.58574400  | -1.01649600 |
| C | -2.08371600 | 1.83626700  | -1.31364000 |

|    |             |             |             |
|----|-------------|-------------|-------------|
| C  | -2.81475200 | 0.81469500  | -1.90868200 |
| H  | -3.85735700 | 0.96290400  | -2.15763300 |
| C  | 1.17676700  | -0.01650800 | -1.05483900 |
| C  | 2.00315300  | 0.91826500  | -0.39829300 |
| C  | 3.32915800  | 0.50982400  | -0.08390500 |
| C  | 2.84015300  | -1.63718200 | -1.12069800 |
| C  | 3.72339000  | -0.76219900 | -0.47032500 |
| H  | 4.72082100  | -1.10957900 | -0.23335000 |
| N  | -0.93586600 | -0.66224500 | -1.93055800 |
| N  | 1.59076700  | -1.26200800 | -1.40896100 |
| C  | 3.23081800  | -3.04302000 | -1.46224300 |
| H  | 2.71035500  | -3.72182500 | -0.78070000 |
| H  | 2.91835900  | -3.28834000 | -2.48065900 |
| H  | 4.30509100  | -3.19921900 | -1.36752000 |
| Ni | 0.09493300  | -2.42861200 | -2.09092100 |
| C  | -1.63103800 | -3.17514800 | -0.10711400 |
| H  | -2.36232500 | -2.48582900 | -0.51707700 |
| C  | -0.94679300 | -3.97413500 | -1.03550200 |
| H  | -0.20051200 | -4.65880600 | -0.63461100 |
| C  | -1.16385900 | -3.97468800 | -2.45307900 |
| H  | -2.11093700 | -3.60202500 | -2.83994800 |
| H  | -0.74791100 | -4.80199300 | -3.02113100 |
| C  | 0.48952300  | -2.24913100 | 1.43855200  |
| O  | 0.34790000  | -1.07784600 | 1.64292300  |
| O  | 1.26471000  | -3.14864500 | 1.25763900  |
| C  | -1.43143700 | -3.14287000 | 1.29881400  |
| H  | -1.07210200 | -4.05876200 | 1.76099400  |
| C  | -2.28873900 | -2.30482100 | 2.14534300  |
| C  | -2.64504500 | -2.71327100 | 3.44379700  |
| C  | -2.73227000 | -1.03631800 | 1.71881900  |
| C  | -3.42559600 | -1.90710100 | 4.26816400  |
| H  | -2.30693000 | -3.68038300 | 3.80340900  |
| C  | -3.51360500 | -0.23219500 | 2.54195300  |
| H  | -2.43316400 | -0.66496200 | 0.74600500  |
| C  | -3.87013700 | -0.66071500 | 3.82244200  |
| H  | -3.68967000 | -2.25324500 | 5.26206800  |
| H  | -3.83136900 | 0.74367900  | 2.18935600  |
| H  | -4.47584200 | -0.03110400 | 4.46439900  |
| C  | 1.45210100  | 2.20280200  | -0.07938000 |
| C  | 0.15880400  | 2.51837000  | -0.36282900 |
| H  | 2.08277100  | 2.93462400  | 0.40630300  |
| H  | -0.22625100 | 3.48897200  | -0.08365600 |
| H  | -2.77199300 | -1.20924400 | -2.66933300 |
| C  | 4.27642900  | 1.37273400  | 0.66443700  |

|   |             |            |             |
|---|-------------|------------|-------------|
| C | 3.93957200  | 1.87553800 | 1.92928900  |
| C | 5.54357400  | 1.65281000 | 0.13639500  |
| C | 4.84944200  | 2.64860900 | 2.64547100  |
| H | 2.97200400  | 1.63988700 | 2.35696700  |
| C | 6.44863100  | 2.43381300 | 0.85105800  |
| H | 5.81090300  | 1.26784600 | -0.84108800 |
| C | 6.10393000  | 2.93377700 | 2.10641100  |
| H | 4.57999200  | 3.02384400 | 3.62592300  |
| H | 7.42195700  | 2.65210800 | 0.42696200  |
| H | 6.80988400  | 3.53934600 | 2.66291600  |
| C | -2.75305300 | 3.12245100 | -0.99881400 |
| C | -3.92965200 | 3.12270600 | -0.23677300 |
| C | -2.25689400 | 4.34123800 | -1.48203700 |
| C | -4.58662000 | 4.31677600 | 0.04889400  |
| H | -4.32036000 | 2.18496900 | 0.14165900  |
| C | -2.92074300 | 5.53294800 | -1.20279200 |
| H | -1.36183000 | 4.35192800 | -2.09286300 |
| C | -4.08398300 | 5.52478700 | -0.43334200 |
| H | -5.48912500 | 4.30287300 | 0.64890900  |
| H | -2.53126200 | 6.46722300 | -1.59029300 |
| H | -4.59656900 | 6.45398100 | -0.21308000 |

### D-In6'

Thermal Correction to Free Energy: 0.470999 Hartree

SCF energy: -1820.326638 Hartree

Gibbs free energy: -1819.855639 Hartree

Coordinates:

|   |             |             |            |
|---|-------------|-------------|------------|
| C | -0.65296700 | 3.01176700  | 0.57106700 |
| C | 0.62181400  | 1.20272000  | 1.28833100 |
| C | 1.79124000  | 2.00900200  | 1.39605000 |
| C | 1.70371800  | 3.37177000  | 1.04111500 |
| C | 0.43641500  | 3.85742400  | 0.64092900 |
| H | 0.32065300  | 4.89430200  | 0.35127900 |
| C | 0.66260900  | -0.18503600 | 1.56759200 |
| C | 1.86377100  | -0.80669500 | 2.00387200 |
| C | 1.85047300  | -2.20211800 | 2.20548500 |
| C | -0.48792500 | -2.22080100 | 1.50498300 |
| C | 0.65279800  | -2.88939800 | 1.93504300 |
| H | 0.60782900  | -3.96139000 | 2.08243900 |
| N | -0.59908200 | 1.70442800  | 0.88708700 |
| N | -0.50336000 | -0.88402200 | 1.34150100 |
| C | -1.75191300 | -2.96063400 | 1.17126200 |
| H | -1.76541300 | -3.95378800 | 1.62194300 |
| H | -2.62579500 | -2.39164200 | 1.49188500 |

|    |             |             |             |
|----|-------------|-------------|-------------|
| H  | -1.83793000 | -3.07476800 | 0.08575300  |
| Ni | -1.84987100 | 0.26410500  | 0.36207400  |
| C  | -0.18273600 | -0.44059100 | -1.69971200 |
| H  | -0.04554400 | -1.50699100 | -1.51931100 |
| C  | -1.54340100 | -0.00563400 | -1.69905300 |
| H  | -1.70454500 | 1.00833300  | -2.07923900 |
| C  | -2.65257200 | -0.98012600 | -2.06256700 |
| H  | -2.27388600 | -2.00851900 | -1.99897300 |
| H  | -3.01926800 | -0.86050400 | -3.08941100 |
| C  | -3.87742400 | -0.94149400 | -1.12615500 |
| O  | -4.96521000 | -1.37461900 | -1.51336000 |
| O  | -3.66143300 | -0.47714000 | 0.06713400  |
| C  | 0.93901400  | 0.34087200  | -1.78035300 |
| H  | 0.79615800  | 1.40363900  | -1.96924900 |
| C  | 2.31078600  | -0.07275500 | -1.56955800 |
| C  | 3.35836400  | 0.85468300  | -1.78434000 |
| C  | 2.69170400  | -1.36240700 | -1.12663300 |
| C  | 4.69080500  | 0.52137000  | -1.57165000 |
| H  | 3.10525400  | 1.85803200  | -2.11374300 |
| C  | 4.02397100  | -1.69330500 | -0.91857300 |
| H  | 1.92984600  | -2.09948300 | -0.90219200 |
| C  | 5.04105900  | -0.75848300 | -1.13523300 |
| H  | 5.46160500  | 1.26712500  | -1.74149400 |
| H  | 4.27214800  | -2.68583600 | -0.55690500 |
| H  | 6.07860400  | -1.01990700 | -0.96006200 |
| H  | -1.61772600 | 3.37592700  | 0.23443300  |
| C  | 2.98550400  | 1.36063700  | 1.86586100  |
| C  | 3.02125800  | 0.03180300  | 2.14629500  |
| H  | 3.88489300  | 1.94876200  | 1.98584700  |
| H  | 3.95408900  | -0.41619000 | 2.45957800  |
| C  | 3.03723200  | -2.97018800 | 2.64953300  |
| C  | 3.75501900  | -2.62438100 | 3.80515900  |
| C  | 3.44864600  | -4.10097600 | 1.92583900  |
| C  | 4.85449500  | -3.37555400 | 4.21442300  |
| H  | 3.43610000  | -1.77247600 | 4.39431100  |
| C  | 4.54927600  | -4.85020900 | 2.33303400  |
| H  | 2.90850000  | -4.38035500 | 1.02842000  |
| C  | 5.25894200  | -4.48947300 | 3.47873500  |
| H  | 5.39112400  | -3.09412300 | 5.11366000  |
| H  | 4.85586100  | -5.71338900 | 1.75273400  |
| H  | 6.11581800  | -5.07222600 | 3.79693400  |
| C  | 2.86173600  | 4.29515000  | 1.04243800  |
| C  | 2.75968400  | 5.55691100  | 1.65192900  |
| C  | 4.06525400  | 3.96796100  | 0.39385100  |



|   |            |            |             |
|---|------------|------------|-------------|
| C | 3.82636400 | 6.45175900 | 1.62970900  |
| H | 1.84022600 | 5.82805400 | 2.15888400  |
| C | 5.13094000 | 4.86388200 | 0.37171300  |
| H | 4.15188500 | 3.01379200 | -0.11155900 |
| C | 5.01863900 | 6.10894200 | 0.99136000  |
| H | 3.72773300 | 7.41660100 | 2.11489700  |
| H | 6.04769600 | 4.59206100 | -0.14000100 |
| H | 5.84868000 | 6.80600000 | 0.97297100  |

### D-TS6'

Thermal Correction to Free Energy: 0.478942 Hartree

SCF energy: -2008.967542 Hartree

Gibbs free energy: -2008.488600 Hartree

Coordinates:

|    |             |             |             |
|----|-------------|-------------|-------------|
| C  | -0.42553700 | -2.95065100 | -1.52244700 |
| C  | 0.25762500  | -0.74886200 | -1.26848200 |
| C  | 1.61010400  | -1.13277100 | -1.07194400 |
| C  | 1.92056400  | -2.51381100 | -1.08737100 |
| C  | 0.86940100  | -3.41073100 | -1.33628400 |
| H  | 1.05766200  | -4.47677700 | -1.34952000 |
| C  | -0.13274400 | 0.61668000  | -1.19885800 |
| C  | 0.82775800  | 1.63243800  | -0.97064000 |
| C  | 0.36375000  | 2.96422900  | -0.86217800 |
| C  | -1.90873500 | 2.13071700  | -1.16857800 |
| C  | -1.01716700 | 3.17951000  | -0.95630400 |
| H  | -1.40613500 | 4.18728400  | -0.87882700 |
| N  | -0.75091100 | -1.65135600 | -1.49367700 |
| N  | -1.47727200 | 0.86349700  | -1.31075400 |
| C  | -3.39250600 | 2.35281900  | -1.22024900 |
| H  | -3.63564600 | 3.39858500  | -1.41074700 |
| H  | -3.84827100 | 1.71702600  | -1.98123200 |
| H  | -3.84160300 | 2.06587200  | -0.26317900 |
| Ni | -2.54920500 | -0.84371700 | -1.33057200 |
| C  | -2.37321600 | -0.65649400 | 1.27398700  |
| H  | -2.62406500 | 0.39109700  | 1.43122800  |
| C  | -3.33559800 | -1.41304600 | 0.61262800  |
| H  | -3.17556600 | -2.49195800 | 0.57169600  |
| C  | -4.77383700 | -0.95890200 | 0.48357500  |
| C  | -5.32452300 | -0.93804700 | -0.95763700 |
| O  | -6.53805800 | -1.01094900 | -1.15442100 |
| O  | -4.43839500 | -0.79428100 | -1.89620900 |
| H  | -4.86943300 | 0.07151600  | 0.84837200  |
| C  | -2.02634500 | -1.62055100 | 3.74900700  |
| O  | -1.90601100 | -0.65712200 | 4.43879800  |

|   |             |             |             |
|---|-------------|-------------|-------------|
| O | -2.38965900 | -2.74645900 | 3.59901000  |
| C | -1.13631400 | -1.10571900 | 1.78565300  |
| H | -0.86558000 | -2.12845900 | 1.53720000  |
| H | -5.45631000 | -1.56219200 | 1.09188200  |
| C | -0.00968500 | -0.24182600 | 2.12488100  |
| C | 1.24647300  | -0.82319200 | 2.40708000  |
| C | -0.10104500 | 1.15998200  | 2.24877100  |
| C | 2.33660100  | -0.05687400 | 2.79914000  |
| H | 1.35644200  | -1.89905700 | 2.30961300  |
| C | 0.99318900  | 1.92640700  | 2.63517300  |
| H | -1.03245800 | 1.66252400  | 2.01750000  |
| C | 2.22267300  | 1.33029000  | 2.91861500  |
| H | 3.28521200  | -0.54223500 | 3.00720100  |
| H | 0.88906500  | 3.00425800  | 2.70045300  |
| H | 3.07423100  | 1.93272700  | 3.21411700  |
| H | -1.24482500 | -3.64234200 | -1.68227800 |
| C | 2.56601600  | -0.08237100 | -0.86502900 |
| C | 2.19438100  | 1.22398800  | -0.80937700 |
| H | 3.60736200  | -0.34193700 | -0.73421600 |
| H | 2.94429200  | 1.97725800  | -0.61218800 |
| C | 1.26247100  | 4.11875800  | -0.62435300 |
| C | 2.37375000  | 4.36984100  | -1.44361800 |
| C | 0.98928200  | 5.01305100  | 0.42227800  |
| C | 3.19250500  | 5.47300000  | -1.21459000 |
| H | 2.58436000  | 3.70635600  | -2.27420900 |
| C | 1.81031100  | 6.11361000  | 0.65345800  |
| H | 0.13612400  | 4.83087300  | 1.06535700  |
| C | 2.91692000  | 6.34692400  | -0.16296200 |
| H | 4.04283600  | 5.65327500  | -1.86261600 |
| H | 1.58793100  | 6.78658900  | 1.47393200  |
| H | 3.55650600  | 7.20355100  | 0.01622000  |
| C | 3.28089300  | -3.04663200 | -0.83448900 |
| C | 3.84606200  | -3.98053000 | -1.71649700 |
| C | 4.00997200  | -2.67895000 | 0.30750200  |
| C | 5.10719200  | -4.51856500 | -1.47300900 |
| H | 3.29672500  | -4.27296500 | -2.60440200 |
| C | 5.26932900  | -3.22050300 | 0.55184600  |
| H | 3.57532800  | -1.98119800 | 1.01237100  |
| C | 5.82465000  | -4.13978000 | -0.33836600 |
| H | 5.53070600  | -5.23164200 | -2.17137300 |
| H | 5.81371300  | -2.92940100 | 1.44319700  |
| H | 6.80568900  | -4.55967900 | -0.14794500 |

**D-TS8'**

Thermal Correction to Free Energy: 0.475727 Hartree

SCF energy: -2008.956768 Hartree

Gibbs free energy: -2008.481041 Hartree

Coordinates:

|    |             |             |             |
|----|-------------|-------------|-------------|
| C  | 1.03547400  | 2.65712900  | -1.20270000 |
| C  | -0.43307100 | 0.88478300  | -0.95824900 |
| C  | -1.52583400 | 1.75285400  | -0.70512000 |
| C  | -1.28022100 | 3.15219400  | -0.70006800 |
| C  | 0.01928500  | 3.57953600  | -0.98313900 |
| H  | 0.25361700  | 4.63673700  | -0.99231800 |
| C  | -0.61155500 | -0.53818200 | -0.94380700 |
| C  | -1.88575100 | -1.08919300 | -0.67528300 |
| C  | -1.99021600 | -2.50340300 | -0.61208000 |
| C  | 0.39993800  | -2.62481700 | -1.06413300 |
| C  | -0.83123200 | -3.24168000 | -0.79840200 |
| H  | -0.87158000 | -4.32288900 | -0.75144800 |
| N  | 0.83795000  | 1.33383400  | -1.17691700 |
| N  | 0.50659000  | -1.29519900 | -1.16085600 |
| C  | 1.64499900  | -3.44979600 | -1.21490800 |
| H  | 1.41446600  | -4.44425800 | -1.60098300 |
| H  | 2.36905600  | -2.94750800 | -1.85472100 |
| H  | 2.11603400  | -3.57346100 | -0.23314000 |
| Ni | 2.20539500  | -0.15197200 | -1.09036300 |
| C  | 3.16453300  | -0.16982600 | 0.87942500  |
| H  | 3.37312400  | -1.22965000 | 1.03560400  |
| C  | 4.18387900  | 0.56638700  | 0.23198300  |
| H  | 4.01235700  | 1.61914600  | 0.02574300  |
| C  | 5.29196300  | -0.13616000 | -0.50049900 |
| C  | 4.92121000  | -1.04712300 | -1.70233300 |
| O  | 5.84871600  | -1.63453400 | -2.27759500 |
| O  | 3.68216100  | -1.15206400 | -2.03026100 |
| C  | 1.98804200  | 0.35764000  | 1.43011200  |
| H  | 1.85034000  | 1.42927800  | 1.32973000  |
| H  | 5.86072600  | -0.77806700 | 0.18373300  |
| C  | 5.27342800  | 1.25309900  | 2.27494800  |
| O  | 4.56118300  | 2.12765900  | 2.62089500  |
| O  | 6.19128900  | 0.51223400  | 2.31673500  |
| H  | 6.02088100  | 0.58608700  | -0.88099500 |
| C  | 0.88081800  | -0.35575100 | 1.99321900  |
| C  | -0.31283400 | 0.35031500  | 2.30265800  |
| C  | 0.84477500  | -1.76380800 | 2.18265800  |
| C  | -1.45680500 | -0.29985900 | 2.74423800  |
| H  | -0.33216200 | 1.42567900  | 2.15653200  |
| C  | -0.30316800 | -2.40520300 | 2.62087100  |

|   |             |             |             |
|---|-------------|-------------|-------------|
| H | 1.72362100  | -2.35544000 | 1.95286000  |
| C | -1.47261400 | -1.68757100 | 2.90166200  |
| H | -2.35301000 | 0.27847900  | 2.94448200  |
| H | -0.29667900 | -3.48548100 | 2.72979900  |
| H | -2.37110600 | -2.20073900 | 3.22345400  |
| C | -2.80934900 | 1.15930200  | -0.46609500 |
| C | -2.97578600 | -0.19053300 | -0.43960700 |
| H | -3.65994300 | 1.80389600  | -0.29210400 |
| H | -3.95250200 | -0.60085000 | -0.22239900 |
| C | -3.26754600 | -3.20779300 | -0.33675200 |
| C | -4.40154400 | -3.00806200 | -1.13652900 |
| C | -3.34140400 | -4.12445900 | 0.72146200  |
| C | -5.58136100 | -3.70265700 | -0.87899600 |
| H | -4.35205700 | -2.31807400 | -1.97091500 |
| C | -4.52253900 | -4.81538900 | 0.98047500  |
| H | -2.47219200 | -4.27467000 | 1.35062600  |
| C | -5.64667400 | -4.60584500 | 0.18166400  |
| H | -6.44767100 | -3.54170400 | -1.51053200 |
| H | -4.56612900 | -5.51367800 | 1.80864400  |
| H | -6.56613500 | -5.14346700 | 0.38311800  |
| C | -2.32490100 | 4.15668000  | -0.38386600 |
| C | -2.55843200 | 5.22976500  | -1.25615600 |
| C | -3.05884700 | 4.08975000  | 0.81044000  |
| C | -3.50844100 | 6.20122700  | -0.95019800 |
| H | -1.99977300 | 5.29186700  | -2.18328400 |
| C | -4.00491500 | 5.06429200  | 1.11755600  |
| H | -2.87041200 | 3.28140600  | 1.50744600  |
| C | -4.23564000 | 6.12148000  | 0.23714800  |
| H | -3.68213500 | 7.01901900  | -1.64041900 |
| H | -4.55724900 | 5.00121100  | 2.04829700  |
| H | -4.97388900 | 6.87831700  | 0.47617400  |
| H | 2.05480000  | 2.98128700  | -1.37618300 |

**S-TS3' (S-TS3 with the full ligand)**

Thermal Correction to Free Energy: 0.470208 Hartree

SCF energy: -1820.156545 Hartree

Gibbs free energy: -1819.686337 Hartree

Coordinates:

|   |             |             |             |
|---|-------------|-------------|-------------|
| C | -0.68466500 | -3.01829700 | -0.60222500 |
| C | 0.23081100  | -0.89624300 | -0.69660200 |
| C | 1.55013100  | -1.40981400 | -0.62485600 |
| C | 1.71849100  | -2.81998900 | -0.52442200 |
| C | 0.57908900  | -3.61019100 | -0.56306600 |
| H | 0.65616200  | -4.68795600 | -0.49799700 |

|    |             |             |             |
|----|-------------|-------------|-------------|
| C  | 0.01483200  | 0.53201100  | -0.78732600 |
| C  | 1.11991100  | 1.41352500  | -0.74415400 |
| C  | 0.83943000  | 2.81176900  | -0.74437600 |
| C  | -1.52056700 | 2.25604700  | -0.87222300 |
| C  | -0.48420300 | 3.20732100  | -0.78598900 |
| H  | -0.73234600 | 4.26210000  | -0.78069400 |
| N  | -0.86951100 | -1.69958800 | -0.63158900 |
| N  | -1.26738500 | 0.95505700  | -0.88400600 |
| C  | -2.96004700 | 2.68415000  | -0.94167300 |
| H  | -3.59112300 | 1.82299000  | -1.15715500 |
| H  | -3.27196800 | 3.11456500  | 0.01575400  |
| H  | -3.10837500 | 3.45151600  | -1.70576800 |
| Ni | -2.56175800 | -0.86127900 | -0.07967000 |
| C  | -3.67542400 | -0.22916500 | 1.44398100  |
| H  | -3.79063300 | 0.85166100  | 1.41597800  |
| C  | -4.83221700 | -1.01631800 | 1.18563600  |
| H  | -4.76383100 | -2.07373100 | 1.43922400  |
| C  | -5.96693900 | -0.59249500 | 0.52730400  |
| H  | -6.13607200 | 0.46814000  | 0.36162300  |
| H  | -6.83083800 | -1.24001100 | 0.45761400  |
| C  | -5.27605500 | -0.95217100 | -1.64199300 |
| O  | -6.27176500 | -1.26869100 | -2.18795900 |
| O  | -4.10518700 | -0.70864600 | -1.61982400 |
| C  | -2.43525300 | -0.83245900 | 1.85741400  |
| H  | -2.48209000 | -1.85627500 | 2.23453000  |
| C  | -1.24820400 | -0.08096500 | 2.30858500  |
| C  | -1.20376600 | 1.32178400  | 2.39397900  |
| C  | -0.05899700 | -0.78441100 | 2.57942200  |
| C  | -0.02197900 | 1.98702800  | 2.70709100  |
| H  | -2.09623600 | 1.90129100  | 2.19290300  |
| C  | 1.12290900  | -0.12000500 | 2.88712600  |
| H  | -0.06315400 | -1.86738200 | 2.50636600  |
| C  | 1.15193900  | 1.27408100  | 2.94865100  |
| H  | -0.01565800 | 3.07056500  | 2.75199400  |
| H  | 2.02731000  | -0.69081000 | 3.06893100  |
| H  | 2.07499100  | 1.79603400  | 3.17326200  |
| H  | -1.58099300 | -3.62420700 | -0.56084600 |
| C  | 1.90957400  | 3.84024200  | -0.67209600 |
| C  | 2.92167800  | 3.91153500  | -1.63912800 |
| C  | 1.89551400  | 4.78358300  | 0.36379700  |
| C  | 3.89829100  | 4.90197000  | -1.56798700 |
| H  | 2.93303900  | 3.19804600  | -2.45498400 |
| C  | 2.87678600  | 5.76957600  | 0.43754200  |
| H  | 1.11889400  | 4.73250600  | 1.11809800  |

|   |            |             |             |
|---|------------|-------------|-------------|
| C | 3.88085300 | 5.83134400  | -0.52789600 |
| H | 4.67054600 | 4.94958700  | -2.32718300 |
| H | 2.85767900 | 6.48716800  | 1.24980300  |
| H | 4.64390000 | 6.59911700  | -0.47177300 |
| C | 3.04637000 | -3.45991800 | -0.34773400 |
| C | 3.46733000 | -4.46981000 | -1.22273000 |
| C | 3.87324200 | -3.10650800 | 0.72843900  |
| C | 4.69436100 | -5.10196200 | -1.03445100 |
| H | 2.83549500 | -4.74898300 | -2.05825900 |
| C | 5.09521400 | -3.74544100 | 0.91980600  |
| H | 3.54740800 | -2.34188100 | 1.42412500  |
| C | 5.51122100 | -4.74184500 | 0.03670500  |
| H | 5.01176700 | -5.87494000 | -1.72488800 |
| H | 5.72001700 | -3.46794400 | 1.76094900  |
| H | 6.46453000 | -5.23606300 | 0.18418000  |
| C | 2.43781400 | 0.86036000  | -0.66645900 |
| C | 2.64333600 | -0.48338900 | -0.63295900 |
| H | 3.28672800 | 1.52914300  | -0.62965300 |
| H | 3.65309800 | -0.86760500 | -0.59474600 |
